# Supplementary material for: Network Modeling Identifies Molecular Functions Targeted by miR-204 to Suppress Head and Neck Tumor Metastasis
Source: PLoS Comput Biol. 2010 Apr 1;6(4):e1000730. doi: 10.1371/journal.pcbi.1000730 (PMC2848541; doi:10.1371/journal.pcbi.1000730)
Supplement: Dataset S1 — OncoMIM Table: Cancer-related terms in OMIM (2.46 MB XLS) [file pcbi.1000730.s004.xls]

## Sheet: OncoMIM-Mapping
Supporting Dataset 1. OncoMIM Table: Cancer-related terms in OMIM are mapped to the SNOMED terms. This table shows the MIM terms that have been mapped to the SNOMED ontology to form OncoMIM (Protocol S1). For general reuse, the UMLS codes associated to the SNOMED ones are provided. *=T; Title, A; Alternative titles, P; Phenotype, C; Class, S; Sub class, AV; Allelic variants, VA; Suballelic varian…
OMIM ID	OMIM Category*	OMIM Term	SNOMED ID	SNOMED Category	UMLS code associated to the SNOMED code
101000	A	ACOUSTIC NEURINOMA, BILATERAL	92071005	disease	C0004992
101000	A	ACOUSTIC NEURINOMA, BILATERAL	126966009	disease	C0010267
101000	A	ACOUSTIC NEURINOMA, BILATERAL	363228008	disease	C0013449
101000	P	Glioma	115240006	morphology	C0017638
101000	P	Glioma	74532006	morphology	C0017638
101000	A	ACOUSTIC NEURINOMA, BILATERAL	255055008	disease	C0018671
101000	A	ACOUSTIC NEURINOMA, BILATERAL	126631009	disease	C0018675
101000	P	Meningioma	19453003	morphology	C0025286
101000	T	NEUROFIBROMATOSIS, TYPE II	86251006	morphology	C0027651
101000	A	ACOUSTIC NEURINOMA, BILATERAL	126950007	disease	C0027766
101000	A	ACOUSTIC NEURINOMA, BILATERAL	404022001	disease	C0027809
101000	A	ACOUSTIC NEURINOMA, BILATERAL	985004	morphology	C0027809
101000	T	NEUROFIBROMATOSIS, TYPE II	115242003	morphology	C0027830
101000	P	Occasional neurofibroma	404029005	disease	C0027830
101000	P	Occasional neurofibroma	89084002	morphology	C0027830
101000	T	NEUROFIBROMATOSIS, TYPE II	81669005	morphology	C0027831
101000	A	BILATERAL ACOUSTIC NEUROFIBROMATOSIS	92503002	disease	C0027832
101000	A	ACOUSTIC NEURINOMA, BILATERAL	126949007	disease	C0027859
101000	A	ACOUSTIC NEURINOMA, BILATERAL	985004	morphology	C0027859
101000	A	ACOUSTIC NEURINOMA, BILATERAL	20376005	disease	C0086692
101000	A	ACOUSTIC NEURINOMA, BILATERAL	3898006	morphology	C0086692
101000	A	BILATERAL ACOUSTIC NEUROFIBROMATOSIS	19133005	disease	C0162678
101000	T	NEUROFIBROMATOSIS, TYPE II	81669005	morphology	C0162678
101000	T	NEUROFIBROMATOSIS, TYPE II	115242003	morphology	C0206727
101000	A	BILATERAL ACOUSTIC NEUROFIBROMATOSIS	55352002	disease	C0277576
101000	A	ACOUSTIC NEURINOMA, BILATERAL	254467007	disease	C0345616
101000	A	ACOUSTIC NEURINOMA, BILATERAL	387891008	disease	C0346330
101000	A	ACOUSTIC NEURINOMA, BILATERAL	254981002	disease	C0346332
101000	A	ACOUSTIC NEURINOMA, BILATERAL	255057000	disease	C0346433
101000	A	ACOUSTIC NEURINOMA, BILATERAL	255156006	disease	C0347209
101000	A	ACOUSTIC NEURINOMA, BILATERAL	255181009	disease	C0347354
101000	P	Meningioma	409659004	morphology	C0348426
101000	P	Meningioma	19453003	morphology	C0431119
101000	A	ACOUSTIC NEURINOMA, BILATERAL	985004	morphology	C0431124
101000	A	BILATERAL ACOUSTIC NEUROFIBROMATOSIS	239003009	disease	C0473571
101000	T	NEUROFIBROMATOSIS, TYPE II	253061008	morphology	C0474842
101000	P	Glioma	253062001	morphology	C0474843
101000	A	ACOUSTIC NEURINOMA, BILATERAL	92247009	disease	C0497550
101000	P	Glioma	416500007	morphology	C0555198
101000	P	Glioma	74532006	morphology	C0555198
101000	T	NEUROFIBROMATOSIS, TYPE II	86251006	morphology	C0677041
101000	A	ACOUSTIC NEURINOMA, BILATERAL	92131002	disease	C0684803
101000	A	ACOUSTIC NEURINOMA, BILATERAL	91962001	disease	C0686435
101000	P	Glioma	86049000	morphology	C0936282
101000	P	Meningioma	127579001	morphology	C1266187
101000	A	ACOUSTIC NEURINOMA, BILATERAL	387893006	disease	C1270830
101000	A	ACOUSTIC NEURINOMA, BILATERAL	402874001	disease	C1274306
101000	A	ACOUSTIC NEURINOMA, BILATERAL	402875000	disease	C1274307
101000	P	Glioma	367651003	morphology	C1288351
101000	A	ACOUSTIC NEURINOMA, BILATERAL	127331007	disease	C1290833
101000	A	ACOUSTIC NEURINOMA, BILATERAL	400193007	morphology	C1302876
101000	A	ACOUSTIC NEURINOMA, BILATERAL	985004	morphology	C1306247
101000	P	Glioma	86049000	morphology	C1306459
101000	T	NEUROFIBROMATOSIS, TYPE II	81669005	morphology	C1314735
101000	A	ACOUSTIC NEURINOMA, BILATERAL	985004	morphology	C1370659
101000	P	Meningioma	19453003	morphology	C1384406
101000	P	Meningioma	19453003	morphology	C1384407
101000	P	Meningioma	19453003	morphology	C1384408
101000	A	ACOUSTIC NEURINOMA, BILATERAL	985004	morphology	C1536561
101800	P	Pigmented nevi	21119008	morphology	C0018508
101800	P	Pigmented nevi	21119008	morphology	C0027960
101800	P	Pigmented nevi	21119008	morphology	C0027962
101800	P	Pigmented nevi	3898006	morphology	C0086692
101800	P	Pigmented nevi	115223002	morphology	C0476131
101800	P	Pigmented nevi	397195004	morphology	C1301273
101800	P	Pigmented nevi	400094003	morphology	C1302707
101800	P	Pigmented nevi	21119008	morphology	C1456781
102200	A	PITUITARY ADENOMA PREDISPOSITION, INCLUDED	32048006	morphology	C0001430
102200	A	PITUITARY ADENOMA PREDISPOSITION, INCLUDED	126952004	disease	C0006118
102200	A	PITUITARY ADENOMA PREDISPOSITION, INCLUDED	254935002	disease	C0006118
102200	A	PITUITARY ADENOMA PREDISPOSITION, INCLUDED	387922007	disease	C0014132
102200	A	PITUITARY ADENOMA PREDISPOSITION, INCLUDED	387927001	disease	C0014132
102200	A	PITUITARY ADENOMA PREDISPOSITION, INCLUDED	255055008	disease	C0018671
102200	A	PITUITARY ADENOMA PREDISPOSITION, INCLUDED	126631009	disease	C0018675
102200	A	PITUITARY ADENOMA PREDISPOSITION, INCLUDED	254968009	disease	C0020659
102200	A	PITUITARY ADENOMA PREDISPOSITION, INCLUDED	126950007	disease	C0027766
102200	A	PITUITARY ADENOMA PREDISPOSITION, INCLUDED	128664001	morphology	C0032000
102200	A	PITUITARY ADENOMA PREDISPOSITION, INCLUDED	254956000	disease	C0032000
102200	A	PITUITARY ADENOMA PREDISPOSITION, INCLUDED	127024001	disease	C0032019
102200	A	PITUITARY ADENOMA PREDISPOSITION, INCLUDED	126951006	disease	C0085136
102200	A	PITUITARY ADENOMA PREDISPOSITION, INCLUDED	20376005	disease	C0086692
102200	A	PITUITARY ADENOMA PREDISPOSITION, INCLUDED	3898006	morphology	C0086692
102200	A	PITUITARY ADENOMA PREDISPOSITION, INCLUDED	118285006	morphology	C0205853
102200	A	PITUITARY ADENOMA PREDISPOSITION, INCLUDED	115215004	morphology	C0334275
102200	A	PITUITARY ADENOMA PREDISPOSITION, INCLUDED	255057000	disease	C0346433
102200	A	PITUITARY ADENOMA PREDISPOSITION, INCLUDED	92048008	disease	C0347509
102200	A	PITUITARY ADENOMA PREDISPOSITION, INCLUDED	255200003	disease	C0347514
102200	A	PITUITARY ADENOMA PREDISPOSITION, INCLUDED	92085000	disease	C0347524
102200	A	PITUITARY ADENOMA PREDISPOSITION, INCLUDED	189162003	disease	C0349059
102200	A	PITUITARY ADENOMA PREDISPOSITION, INCLUDED	92030004	disease	C0496899
102200	A	PITUITARY ADENOMA PREDISPOSITION, INCLUDED	92296004	disease	C0496901
102200	A	PITUITARY ADENOMA PREDISPOSITION, INCLUDED	92247009	disease	C0497550
102200	A	PITUITARY ADENOMA PREDISPOSITION, INCLUDED	92131002	disease	C0684803
102200	A	PITUITARY ADENOMA PREDISPOSITION, INCLUDED	275269004	disease	C0686378
102200	A	PITUITARY ADENOMA PREDISPOSITION, INCLUDED	126953009	disease	C1263885
102200	A	PITUITARY ADENOMA PREDISPOSITION, INCLUDED	127331007	disease	C1290833
102200	A	PITUITARY ADENOMA PREDISPOSITION, INCLUDED	399908004	morphology	C1302714
102200	A	PITUITARY ADENOMA PREDISPOSITION, INCLUDED	400207007	morphology	C1302886
102200	A	PITUITARY ADENOMA PREDISPOSITION, INCLUDED	254935002	disease	C1527390
102578	T	ACUTE PROMYELOCYTIC LEUKEMIA, INDUCER OF	363346000	disease	C0006826
102578	T	ACUTE PROMYELOCYTIC LEUKEMIA, INDUCER OF	87163000	morphology	C0023418
102578	T	ACUTE PROMYELOCYTIC LEUKEMIA, INDUCER OF	93143009	disease	C0023418
102578	T	ACUTE PROMYELOCYTIC LEUKEMIA, INDUCER OF	413443009	morphology	C0023467
102578	T	ACUTE PROMYELOCYTIC LEUKEMIA, INDUCER OF	128934006	morphology	C0023470
102578	T	ACUTE PROMYELOCYTIC LEUKEMIA, INDUCER OF	28950004	morphology	C0023487
102578	T	ACUTE PROMYELOCYTIC LEUKEMIA, INDUCER OF	414792005	morphology	C0027022
102578	T	ACUTE PROMYELOCYTIC LEUKEMIA, INDUCER OF	24072005	morphology	C0085669
102578	T	ACUTE PROMYELOCYTIC LEUKEMIA, INDUCER OF	91855006	disease	C0085669
102578	T	ACUTE PROMYELOCYTIC LEUKEMIA, INDUCER OF	269475001	disease	C0348393
102578	T	ACUTE PROMYELOCYTIC LEUKEMIA, INDUCER OF	414388001	morphology	C0376544
102578	T	ACUTE PROMYELOCYTIC LEUKEMIA, INDUCER OF	414644002	morphology	C0376544
102578	T	ACUTE PROMYELOCYTIC LEUKEMIA, INDUCER OF	129154003	disease	C0376545
102578	T	ACUTE PROMYELOCYTIC LEUKEMIA, INDUCER OF	269475001	disease	C0376545
102578	T	ACUTE PROMYELOCYTIC LEUKEMIA, INDUCER OF	93720005	disease	C0686582
102578	T	ACUTE PROMYELOCYTIC LEUKEMIA, INDUCER OF	91855006	disease	C0686587
102578	T	ACUTE PROMYELOCYTIC LEUKEMIA, INDUCER OF	86049000	morphology	C0936282
102578	T	ACUTE PROMYELOCYTIC LEUKEMIA, INDUCER OF	397340004	morphology	C1275661
102578	T	ACUTE PROMYELOCYTIC LEUKEMIA, INDUCER OF	367651003	morphology	C1288351
102578	T	ACUTE PROMYELOCYTIC LEUKEMIA, INDUCER OF	127331007	disease	C1290833
102578	T	ACUTE PROMYELOCYTIC LEUKEMIA, INDUCER OF	128932005	morphology	C1292764
102578	T	ACUTE PROMYELOCYTIC LEUKEMIA, INDUCER OF	128931003	morphology	C1292766
102578	T	ACUTE PROMYELOCYTIC LEUKEMIA, INDUCER OF	372087000	disease	C1306459
102578	T	ACUTE PROMYELOCYTIC LEUKEMIA, INDUCER OF	86049000	morphology	C1306459
102578	T	ACUTE PROMYELOCYTIC LEUKEMIA, INDUCER OF	24072005	morphology	C1378511
102578	T	ACUTE PROMYELOCYTIC LEUKEMIA, INDUCER OF	24072005	morphology	C1378512
102578	T	ACUTE PROMYELOCYTIC LEUKEMIA, INDUCER OF	414823004	disease	C1532167
102578	T	ACUTE PROMYELOCYTIC LEUKEMIA, INDUCER OF	414825006	disease	C1532168
102660	T	ADAMANTINOMA OF LONG BONES	20462008	morphology	C0002448
102660	T	ADAMANTINOMA OF LONG BONES	115239009	morphology	C0005967
102660	T	ADAMANTINOMA OF LONG BONES	126537000	disease	C0005967
102660	T	ADAMANTINOMA OF LONG BONES	240201007	disease	C0005967
102660	T	ADAMANTINOMA OF LONG BONES	363346000	disease	C0006826
102660	T	ADAMANTINOMA OF LONG BONES	127578009	morphology	C0028880
102660	T	ADAMANTINOMA OF LONG BONES	3898006	morphology	C0086692
102660	T	ADAMANTINOMA OF LONG BONES	269466003	disease	C0153509
102660	T	ADAMANTINOMA OF LONG BONES	269466003	disease	C0279530
102660	T	ADAMANTINOMA OF LONG BONES	93725000	disease	C0279530
102660	T	ADAMANTINOMA OF LONG BONES	307609003	disease	C0334556
102660	T	ADAMANTINOMA OF LONG BONES	56763007	morphology	C0334556
102660	T	ADAMANTINOMA OF LONG BONES	240201007	disease	C0919255
102660	T	ADAMANTINOMA OF LONG BONES	86049000	morphology	C0936282
102660	T	ADAMANTINOMA OF LONG BONES	56763007	morphology	C1273017
102660	T	ADAMANTINOMA OF LONG BONES	363229000	disease	C1285375
102660	T	ADAMANTINOMA OF LONG BONES	367651003	morphology	C1288351
102660	T	ADAMANTINOMA OF LONG BONES	128464009	disease	C1290224
102660	T	ADAMANTINOMA OF LONG BONES	127331007	disease	C1290833
102660	T	ADAMANTINOMA OF LONG BONES	372087000	disease	C1306459
102660	T	ADAMANTINOMA OF LONG BONES	86049000	morphology	C1306459
102660	T	ADAMANTINOMA OF LONG BONES	93725000	disease	C1313974
102660	T	ADAMANTINOMA OF LONG BONES	20462008	morphology	C1367555
102700	P	Bcell lymphoma	21964009	morphology	C0024299
102700	P	Bcell lymphoma	115244002	morphology	C0079734
102700	P	Bcell lymphoma	21964009	morphology	C0280803
102700	P	Bcell lymphoma	414388001	morphology	C0376544
102700	P	Bcell lymphoma	414644002	morphology	C0376544
102700	P	Bcell lymphoma	414628006	morphology	C0598798
102700	P	Bcell lymphoma	86049000	morphology	C0936282
102700	P	Bcell lymphoma	367651003	morphology	C1288351
102700	P	Bcell lymphoma	86049000	morphology	C1306459
103200	P	Painful trunk and limb subcutaneous lipomas	46720004	morphology	C0023798
103200	P	Painful trunk and limb subcutaneous lipomas	93163002	disease	C0023798
103200	P	Painful trunk and limb subcutaneous lipomas	387837005	disease	C0037579
103200	P	Painful trunk and limb subcutaneous lipomas	20376005	disease	C0086692
103200	P	Painful trunk and limb subcutaneous lipomas	3898006	morphology	C0086692
103200	P	Painful trunk and limb subcutaneous lipomas	115227001	morphology	C0206631
103200	P	Painful trunk and limb subcutaneous lipomas	254827004	disease	C0206631
103200	P	Painful trunk and limb subcutaneous lipomas	92069005	disease	C0334450
103200	P	Painful trunk and limb subcutaneous lipomas	254830006	disease	C0346118
103200	P	Painful trunk and limb subcutaneous lipomas	134328007	morphology	C0431102
103200	P	Painful trunk and limb subcutaneous lipomas	109350007	disease	C0578546
103200	P	Painful trunk and limb subcutaneous lipomas	253045006	morphology	C0878523
103200	P	Painful trunk and limb subcutaneous lipomas	127331007	disease	C1290833
103200	P	Painful trunk and limb subcutaneous lipomas	400186008	disease	C1302872
103285	P	Premature loss of secondary teeth (<25 years)	363346000	disease	C0006826
103285	P	Premature loss of secondary teeth (<25 years)	14799000	morphology	C0013930
103285	P	Premature loss of secondary teeth (<25 years)	128462008	disease	C0027627
103285	P	Premature loss of secondary teeth (<25 years)	14799000	morphology	C0027627
103285	P	Caused by mutation in the tumor protein p73like gene (TP73L, 603273.0011)	86251006	morphology	C0027651
103285	P	Caused by mutation in the tumor protein p73like gene (TP73L, 603273.0011)	86251006	morphology	C0677041
103285	P	Premature loss of secondary teeth (<25 years)	367651003	morphology	C1288351
104150	P	Elevated serum AFP with: Hepatocellular cancer and non seminomatous testicular cancer	363346000	disease	C0006826
104150	P	Elevated maternal serum and amniotic fluid AFP in: Congenital nephrosis (256300) pregnancy, Spina bifida or anencephalic pregnancy, omphalocele, fetal bowel obstruction, teratoma	86251006	morphology	C0027651
104150	P	Elevated maternal serum and amniotic fluid AFP in: Congenital nephrosis (256300) pregnancy, Spina bifida or anencephalic pregnancy, omphalocele, fetal bowel obstruction, teratoma	55818009	morphology	C0039538
104150	P	Elevated maternal serum and amniotic fluid AFP in: Congenital nephrosis (256300) pregnancy, Spina bifida or anencephalic pregnancy, omphalocele, fetal bowel obstruction, teratoma	115233005	morphology	C0205851
104150	P	Elevated maternal serum and amniotic fluid AFP in: Congenital nephrosis (256300) pregnancy, Spina bifida or anencephalic pregnancy, omphalocele, fetal bowel obstruction, teratoma	86251006	morphology	C0677041
104150	P	Elevated serum AFP with: Hepatocellular cancer and non seminomatous testicular cancer	86049000	morphology	C0936282
104150	P	Elevated serum AFP with: Hepatocellular cancer and non seminomatous testicular cancer	367651003	morphology	C1288351
104150	P	Elevated serum AFP with: Hepatocellular cancer and non seminomatous testicular cancer	86049000	morphology	C1306459
104150	P	Elevated maternal serum and amniotic fluid AFP in: Congenital nephrosis (256300) pregnancy, Spina bifida or anencephalic pregnancy, omphalocele, fetal bowel obstruction, teratoma	55818009	morphology	C1368910
104150	P	Elevated maternal serum and amniotic fluid AFP in: Congenital nephrosis (256300) pregnancy, Spina bifida or anencephalic pregnancy, omphalocele, fetal bowel obstruction, teratoma	55818009	morphology	C1456864
104150	P	Elevated maternal serum and amniotic fluid AFP in: Congenital nephrosis (256300) pregnancy, Spina bifida or anencephalic pregnancy, omphalocele, fetal bowel obstruction, teratoma	417197004	morphology	C1563165
104155	AV	PROSTATE CANCER	128050000	disease	C0000735
104155	AV	PROSTATE CANCER	363346000	disease	C0006826
104155	AV	PROSTATE CANCER	126895004	disease	C0017417
104155	AV	PROSTATE CANCER	126644004	disease	C0030793
104155	AV	PROSTATE CANCER	126906006	disease	C0033578
104155	AV	PROSTATE CANCER	126879004	disease	C0042076
104155	AV	PROSTATE CANCER	254913005	disease	C0042076
104155	AV	PROSTATE CANCER	363515000	disease	C0153606
104155	AV	PROSTATE CANCER	188366002	disease	C0153662
104155	AV	PROSTATE CANCER	363484005	disease	C0153663
104155	AV	PROSTATE CANCER	271468000	disease	C0178251
104155	AV	PROSTATE CANCER	399068003	disease	C0376358
104155	AV	PROSTATE CANCER	363517008	disease	C0751571
104155	AV	PROSTATE CANCER	86049000	morphology	C0936282
104155	AV	PROSTATE CANCER	367651003	morphology	C1288351
104155	AV	PROSTATE CANCER	126637008	disease	C1290306
104155	AV	PROSTATE CANCER	127331007	disease	C1290833
104155	AV	PROSTATE CANCER	86049000	morphology	C1306459
104600	P	Pituitary adenoma	32048006	morphology	C0001430
104600	P	Pituitary adenoma	126952004	disease	C0006118
104600	P	Pituitary adenoma	254935002	disease	C0006118
104600	P	Secondary amenorrhea	363346000	disease	C0006826
104600	P	Secondary amenorrhea	14799000	morphology	C0013930
104600	P	Pituitary adenoma	387922007	disease	C0014132
104600	P	Pituitary adenoma	387927001	disease	C0014132
104600	P	Pituitary adenoma	255055008	disease	C0018671
104600	P	Pituitary adenoma	126631009	disease	C0018675
104600	P	Pituitary adenoma	254968009	disease	C0020659
104600	P	Secondary amenorrhea	128462008	disease	C0027627
104600	P	Secondary amenorrhea	14799000	morphology	C0027627
104600	P	Pituitary adenoma	126950007	disease	C0027766
104600	P	Pituitary adenoma	128664001	morphology	C0032000
104600	P	Pituitary adenoma	254956000	disease	C0032000
104600	P	Pituitary adenoma	127024001	disease	C0032019
104600	P	Pituitary adenoma	126951006	disease	C0085136
104600	P	Pituitary adenoma	20376005	disease	C0086692
104600	P	Pituitary adenoma	3898006	morphology	C0086692
104600	P	Pituitary adenoma	118285006	morphology	C0205853
104600	P	Pituitary adenoma	115215004	morphology	C0334275
104600	P	Pituitary adenoma	255057000	disease	C0346433
104600	P	Pituitary adenoma	92048008	disease	C0347509
104600	P	Pituitary adenoma	255200003	disease	C0347514
104600	P	Pituitary adenoma	92085000	disease	C0347524
104600	P	Pituitary adenoma	189162003	disease	C0349059
104600	P	Pituitary adenoma	92030004	disease	C0496899
104600	P	Pituitary adenoma	92296004	disease	C0496901
104600	P	Pituitary adenoma	92247009	disease	C0497550
104600	P	Pituitary adenoma	92131002	disease	C0684803
104600	P	Pituitary adenoma	275269004	disease	C0686378
104600	P	Pituitary adenoma	126953009	disease	C1263885
104600	P	Secondary amenorrhea	367651003	morphology	C1288351
104600	P	Pituitary adenoma	127331007	disease	C1290833
104600	P	Pituitary adenoma	399908004	morphology	C1302714
104600	P	Pituitary adenoma	400207007	morphology	C1302886
104600	P	Pituitary adenoma	254935002	disease	C1527390
105250	T	AMYLOIDOSIS, PRIMARY CUTANEOUS	86251006	morphology	C0027651
105250	T	AMYLOIDOSIS, PRIMARY CUTANEOUS	128817004	morphology	C0268381
105250	T	AMYLOIDOSIS, PRIMARY CUTANEOUS	414388001	morphology	C0376544
105250	T	AMYLOIDOSIS, PRIMARY CUTANEOUS	414628006	morphology	C0598798
105250	T	AMYLOIDOSIS, PRIMARY CUTANEOUS	86251006	morphology	C0677041
105250	T	AMYLOIDOSIS, PRIMARY CUTANEOUS	127580003	morphology	C1136084
105250	T	AMYLOIDOSIS, PRIMARY CUTANEOUS	413616009	morphology	C1332362
105250	T	AMYLOIDOSIS, PRIMARY CUTANEOUS	414389009	morphology	C1533006
105580	T	ANAL CANAL CARCINOMA	128050000	disease	C0000735
105580	T	ANAL CANAL CARCINOMA	126849006	disease	C0003463
105580	T	ANAL CANAL CARCINOMA	363346000	disease	C0006826
105580	T	ANAL CANAL CARCINOMA	68453008	morphology	C0007097
105580	P	Anal canal squamous carcinoma	28899001	morphology	C0007137
105580	T	ANAL CANAL CARCINOMA	402815007	disease	C0007137
105580	T	ANAL CANAL CARCINOMA	126837005	disease	C0009404
105580	T	ANAL CANAL CARCINOMA	128348002	disease	C0012243
105580	T	ANAL CANAL CARCINOMA	128415001	disease	C0012243
105580	T	ANAL CANAL CARCINOMA	126768004	disease	C0017185
105580	T	ANAL CANAL CARCINOMA	126769007	disease	C0021841
105580	T	ANAL CANAL CARCINOMA	126644004	disease	C0030793
105580	T	ANAL CANAL CARCINOMA	387837005	disease	C0037579
105580	T	ANAL CANAL CARCINOMA	363352004	disease	C0153445
105580	T	ANAL CANAL CARCINOMA	93669004	disease	C0153445
105580	T	ANAL CANAL CARCINOMA	363490009	disease	C0153446
105580	T	ANAL CANAL CARCINOMA	93676009	disease	C0153446
105580	T	ANAL CANAL CARCINOMA	188366002	disease	C0153662
105580	T	ANAL CANAL CARCINOMA	363484005	disease	C0153663
105580	T	ANAL CANAL CARCINOMA	93953009	disease	C0153663
105580	T	ANAL CANAL CARCINOMA	118285006	morphology	C0205853
105580	T	ANAL CANAL CARCINOMA	118286007	morphology	C0206720
105580	T	ANAL CANAL CARCINOMA	255084004	disease	C0279637
105580	A	CLOACOGENIC CARCINOMA, INCLUDED	118287003	morphology	C0334265
105580	A	CLOACOGENIC CARCINOMA, INCLUDED	84570003	morphology	C0334273
105580	T	ANAL CANAL CARCINOMA	254532005	disease	C0345760
105580	T	ANAL CANAL CARCINOMA	126850006	disease	C0345883
105580	T	ANAL CANAL CARCINOMA	126611005	disease	C0346143
105580	T	ANAL CANAL CARCINOMA	126612003	disease	C0346146
105580	T	ANAL CANAL CARCINOMA	255077007	disease	C0346617
105580	T	ANAL CANAL CARCINOMA	363508008	disease	C0346627
105580	T	ANAL CANAL CARCINOMA	363510005	disease	C0346629
105580	T	ANAL CANAL CARCINOMA	93854002	disease	C0346629
105580	T	ANAL CANAL CARCINOMA	94111002	disease	C0346955
105580	T	ANAL CANAL CARCINOMA	255084004	disease	C0349534
105580	P	Anal canal squamous carcinoma	252988009	morphology	C0474799
105580	T	ANAL CANAL CARCINOMA	285310000	disease	C0563211
105580	T	ANAL CANAL CARCINOMA	363496003	disease	C0684723
105580	T	ANAL CANAL CARCINOMA	363366009	disease	C0684727
105580	T	ANAL CANAL CARCINOMA	93839008	disease	C0684842
105580	T	ANAL CANAL CARCINOMA	86049000	morphology	C0936282
105580	T	ANAL CANAL CARCINOMA	269469005	disease	C1261473
105580	T	ANAL CANAL CARCINOMA	402811003	disease	C1274252
105580	T	ANAL CANAL CARCINOMA	402816008	disease	C1274256
105580	T	ANAL CANAL CARCINOMA	367651003	morphology	C1288351
105580	T	ANAL CANAL CARCINOMA	126608009	disease	C1290284
105580	T	ANAL CANAL CARCINOMA	126615001	disease	C1290288
105580	T	ANAL CANAL CARCINOMA	126637008	disease	C1290306
105580	T	ANAL CANAL CARCINOMA	126643005	disease	C1290312
105580	T	ANAL CANAL CARCINOMA	127331007	disease	C1290833
105580	T	ANAL CANAL CARCINOMA	371992003	disease	C1299288
105580	T	ANAL CANAL CARCINOMA	399879007	morphology	C1302694
105580	T	ANAL CANAL CARCINOMA	400155002	morphology	C1302853
105580	T	ANAL CANAL CARCINOMA	93676009	disease	C1304837
105580	T	ANAL CANAL CARCINOMA	94111002	disease	C1304852
105580	T	ANAL CANAL CARCINOMA	93669004	disease	C1306140
105580	T	ANAL CANAL CARCINOMA	93953009	disease	C1306155
105580	T	ANAL CANAL CARCINOMA	372087000	disease	C1306459
105580	T	ANAL CANAL CARCINOMA	86049000	morphology	C1306459
105580	T	ANAL CANAL CARCINOMA	93854002	disease	C1306548
105580	T	ANAL CANAL CARCINOMA	363745004	disease	C1306632
105580	A	CLOACOGENIC CARCINOMA, INCLUDED	118287003	morphology	C1384509
105580	T	ANAL CANAL CARCINOMA	255084004	disease	C1412036
105580	T	ANAL CANAL CARCINOMA	255084004	disease	C1412037
105590	T	ANAPLASTIC LYMPHOMA KINASE	21964009	morphology	C0024299
105590	T	ANAPLASTIC LYMPHOMA KINASE	115244002	morphology	C0079734
105590	T	ANAPLASTIC LYMPHOMA KINASE	21964009	morphology	C0280803
105590	T	ANAPLASTIC LYMPHOMA KINASE	414388001	morphology	C0376544
105590	T	ANAPLASTIC LYMPHOMA KINASE	414644002	morphology	C0376544
105590	T	ANAPLASTIC LYMPHOMA KINASE	414628006	morphology	C0598798
105590	T	ANAPLASTIC LYMPHOMA KINASE	86049000	morphology	C0936282
105590	T	ANAPLASTIC LYMPHOMA KINASE	367651003	morphology	C1288351
105590	T	ANAPLASTIC LYMPHOMA KINASE	86049000	morphology	C1306459
105600	P	Increased frequency of myeloma or monoclonal gammopathy	363346000	disease	C0006826
105600	P	Increased frequency of myeloma or monoclonal gammopathy	118600007	disease	C0024299
105600	P	Increased frequency of myeloma or monoclonal gammopathy	118601006	disease	C0024305
105600	P	Increased frequency of myeloma or monoclonal gammopathy	128929007	morphology	C0024305
105600	P	Increased frequency of myeloma or monoclonal gammopathy	109989006	disease	C0026764
105600	P	Increased frequency of myeloma or monoclonal gammopathy	55921005	morphology	C0026764
105600	P	Increased frequency of myeloma or monoclonal gammopathy	86251006	morphology	C0027651
105600	P	Increased frequency of myeloma or monoclonal gammopathy	35601003	morphology	C0030489
105600	P	Increased frequency of myeloma or monoclonal gammopathy	109979007	disease	C0079731
105600	P	Increased frequency of myeloma or monoclonal gammopathy	115244002	morphology	C0079734
105600	P	Increased frequency of myeloma or monoclonal gammopathy	35601003	morphology	C0278494
105600	P	Increased frequency of myeloma or monoclonal gammopathy	269475001	disease	C0348393
105600	P	Increased frequency of myeloma or monoclonal gammopathy	414388001	morphology	C0376544
105600	P	Increased frequency of myeloma or monoclonal gammopathy	414644002	morphology	C0376544
105600	P	Increased frequency of myeloma or monoclonal gammopathy	269475001	disease	C0376545
105600	P	Increased frequency of myeloma or monoclonal gammopathy	277606000	disease	C0475799
105600	P	Increased frequency of myeloma or monoclonal gammopathy	275524009	disease	C0555261
105600	P	Increased frequency of myeloma or monoclonal gammopathy	414628006	morphology	C0598798
105600	P	Increased frequency of myeloma or monoclonal gammopathy	86251006	morphology	C0677041
105600	P	Increased frequency of myeloma or monoclonal gammopathy	86049000	morphology	C0936282
105600	P	Increased frequency of myeloma or monoclonal gammopathy	127580003	morphology	C1136084
105600	P	Increased frequency of myeloma or monoclonal gammopathy	415111003	disease	C1136084
105600	P	Increased frequency of myeloma or monoclonal gammopathy	109980005	disease	C1264191
105600	P	Increased frequency of myeloma or monoclonal gammopathy	314922006	morphology	C1282448
105600	P	Increased frequency of myeloma or monoclonal gammopathy	367651003	morphology	C1288351
105600	P	Increased frequency of myeloma or monoclonal gammopathy	399456004	morphology	C1302424
105600	P	Increased frequency of myeloma or monoclonal gammopathy	415110002	disease	C1302424
105600	P	Increased frequency of myeloma or monoclonal gammopathy	372087000	disease	C1306459
105600	P	Increased frequency of myeloma or monoclonal gammopathy	86049000	morphology	C1306459
105600	P	Increased frequency of myeloma or monoclonal gammopathy	413616009	morphology	C1332362
105600	P	Increased frequency of myeloma or monoclonal gammopathy	414646000	morphology	C1532005
105600	P	Increased frequency of myeloma or monoclonal gammopathy	414654003	morphology	C1532008
105600	P	Increased frequency of myeloma or monoclonal gammopathy	414825006	disease	C1532168
105600	P	Increased frequency of myeloma or monoclonal gammopathy	415109007	morphology	C1532559
105600	P	Increased frequency of myeloma or monoclonal gammopathy	414389009	morphology	C1533006
106050	T	ANGIOMA SERPIGINOSUM	2099007	morphology	C0018916
106050	T	ANGIOMA SERPIGINOSUM	253053003	morphology	C0018916
106050	T	ANGIOMA SERPIGINOSUM	3898006	morphology	C0086692
106050	T	ANGIOMA SERPIGINOSUM	115235003	morphology	C0282607
106050	T	ANGIOMA SERPIGINOSUM	2099007	morphology	C0677608
106050	T	ANGIOMA SERPIGINOSUM	400110009	morphology	C0685121
106070	T	ANGIOMA, HEREDITARY NEUROCUTANEOUS	2099007	morphology	C0018916
106070	T	ANGIOMA, HEREDITARY NEUROCUTANEOUS	253053003	morphology	C0018916
106070	T	ANGIOMA, HEREDITARY NEUROCUTANEOUS	3898006	morphology	C0086692
106070	T	ANGIOMA, HEREDITARY NEUROCUTANEOUS	115235003	morphology	C0282607
106070	A	SPINAL ARTERIAL VENOUS MALFORMATIONS WITH CUTANEOUS HEMANGIOMAS, INCLUDED	56468002	morphology	C0334532
106070	T	ANGIOMA, HEREDITARY NEUROCUTANEOUS	2099007	morphology	C0677608
106070	T	ANGIOMA, HEREDITARY NEUROCUTANEOUS	400110009	morphology	C0685121
106260	P	Caused by mutations in the tumor protein p63 gene (TP63, 603273.0009)	86251006	morphology	C0027651
106260	P	Caused by mutations in the tumor protein p63 gene (TP63, 603273.0009)	86251006	morphology	C0677041
107400	P	Increased hepatocellular carcinoma risk	128050000	disease	C0000735
107400	P	Increased hepatocellular carcinoma risk	363346000	disease	C0006826
107400	P	Increased hepatocellular carcinoma risk	68453008	morphology	C0007097
107400	P	Increased hepatocellular carcinoma risk	128348002	disease	C0012243
107400	P	Secondary prevention, avoid smoking, alcohol, and oxidants	14799000	morphology	C0013930
107400	P	Increased hepatocellular carcinoma risk	109841003	disease	C0019204
107400	P	Increased hepatocellular carcinoma risk	126851005	disease	C0019204
107400	P	Increased hepatocellular carcinoma risk	25370001	morphology	C0019204
107400	P	Increased hepatocellular carcinoma risk	126851005	disease	C0023903
107400	P	Increased hepatocellular carcinoma risk	93870000	disease	C0024620
107400	P	Increased hepatocellular carcinoma risk	95214007	disease	C0024620
107400	P	Secondary prevention, avoid smoking, alcohol, and oxidants	128462008	disease	C0027627
107400	P	Secondary prevention, avoid smoking, alcohol, and oxidants	14799000	morphology	C0027627
107400	P	Increased hepatocellular carcinoma risk	188366002	disease	C0153662
107400	P	Increased hepatocellular carcinoma risk	118285006	morphology	C0205853
107400	P	Increased hepatocellular carcinoma risk	115215004	morphology	C0334275
107400	P	Increased hepatocellular carcinoma risk	254532005	disease	C0345760
107400	P	Increased hepatocellular carcinoma risk	93870000	disease	C0345904
107400	P	Increased hepatocellular carcinoma risk	255077007	disease	C0346617
107400	P	Increased hepatocellular carcinoma risk	94111002	disease	C0346955
107400	P	Increased hepatocellular carcinoma risk	253016009	morphology	C0474812
107400	P	Increased hepatocellular carcinoma risk	93839008	disease	C0684842
107400	P	Increased hepatocellular carcinoma risk	86049000	morphology	C0936282
107400	P	Increased hepatocellular carcinoma risk	408646000	disease	C0948680
107400	P	Increased hepatocellular carcinoma risk	367651003	morphology	C1288351
107400	P	Increased hepatocellular carcinoma risk	126637008	disease	C1290306
107400	P	Increased hepatocellular carcinoma risk	126643005	disease	C1290312
107400	P	Increased hepatocellular carcinoma risk	127331007	disease	C1290833
107400	P	Increased hepatocellular carcinoma risk	399879007	morphology	C1302694
107400	P	Increased hepatocellular carcinoma risk	399961007	morphology	C1302750
107400	P	Increased hepatocellular carcinoma risk	94111002	disease	C1304852
107400	P	Increased hepatocellular carcinoma risk	372087000	disease	C1306459
107400	P	Increased hepatocellular carcinoma risk	86049000	morphology	C1306459
107550	P	Linear nevus sebaceous syndrome	21119008	morphology	C0018508
107550	P	Linear nevus sebaceous syndrome	21119008	morphology	C0027960
107550	P	Linear nevus sebaceous syndrome	21119008	morphology	C0027962
107550	P	Linear nevus sebaceous syndrome	3898006	morphology	C0086692
107550	P	Linear nevus sebaceous syndrome	115223002	morphology	C0476131
107550	P	Linear nevus sebaceous syndrome	397195004	morphology	C1301273
107550	P	Linear nevus sebaceous syndrome	400094003	morphology	C1302707
107550	P	Linear nevus sebaceous syndrome	21119008	morphology	C1456781
107950	T	ARRHENOBLASTOMATHYROID ADENOMA	32048006	morphology	C0001430
107950	P	Arrhenoblastoma	62283005	morphology	C0003810
107950	P	Thyroid adenoma	387922007	disease	C0014132
107950	P	Thyroid adenoma	387927001	disease	C0014132
107950	P	Thyroid adenoma	255055008	disease	C0018671
107950	P	Thyroid adenoma	126635000	disease	C0027533
107950	P	Arrhenoblastoma	86251006	morphology	C0027651
107950	P	Thyroid adenoma	127018007	disease	C0040136
107950	P	Thyroid adenoma	20376005	disease	C0086692
107950	T	ARRHENOBLASTOMATHYROID ADENOMA	3898006	morphology	C0086692
107950	P	Thyroid adenoma	255033000	disease	C0151468
107950	P	Thyroid adenoma	92439006	disease	C0154038
107950	T	ARRHENOBLASTOMATHYROID ADENOMA	118285006	morphology	C0205853
107950	P	Arrhenoblastoma	115221000	morphology	C0206724
107950	T	ARRHENOBLASTOMATHYROID ADENOMA	115215004	morphology	C0334275
107950	P	Thyroid adenoma	255057000	disease	C0346433
107950	P	Thyroid adenoma	92085000	disease	C0347524
107950	P	Arrhenoblastoma	86251006	morphology	C0677041
107950	P	Thyroid adenoma	92246000	disease	C0684815
107950	P	Thyroid adenoma	127331007	disease	C1290833
107950	T	ARRHENOBLASTOMATHYROID ADENOMA	399908004	morphology	C1302714
107950	T	ARRHENOBLASTOMATHYROID ADENOMA	400207007	morphology	C1302886
107950	P	Arrhenoblastoma	417629008	morphology	C1562675
108110	P	Facial midline hemangioma	2099007	morphology	C0018916
108110	P	Facial midline hemangioma	253053003	morphology	C0018916
108110	P	Facial midline hemangioma	3898006	morphology	C0086692
108110	P	Facial midline hemangioma	115235003	morphology	C0282607
108110	P	Facial midline hemangioma	2099007	morphology	C0677608
108110	P	Facial midline hemangioma	400110009	morphology	C0685121
108330	P	Highinducibility phenotype at greater risk for bronchogenic carcinoma	126705004	disease	C0006264
108330	P	Highinducibility phenotype at greater risk for bronchogenic carcinoma	363346000	disease	C0006826
108330	P	Highinducibility phenotype at greater risk for bronchogenic carcinoma	68453008	morphology	C0007097
108330	P	Highinducibility phenotype at greater risk for bronchogenic carcinoma	254622008	disease	C0007121
108330	P	Highinducibility phenotype at greater risk for bronchogenic carcinoma	363493006	disease	C0007121
108330	P	Highinducibility phenotype at greater risk for bronchogenic carcinoma	402815007	disease	C0007137
108330	P	Highinducibility phenotype at greater risk for bronchogenic carcinoma	126667002	disease	C0035244
108330	P	Highinducibility phenotype at greater risk for bronchogenic carcinoma	387837005	disease	C0037579
108330	P	Highinducibility phenotype at greater risk for bronchogenic carcinoma	255058005	disease	C0039981
108330	P	Highinducibility phenotype at greater risk for bronchogenic carcinoma	188361007	disease	C0153661
108330	P	Highinducibility phenotype at greater risk for bronchogenic carcinoma	118285006	morphology	C0205853
108330	P	Highinducibility phenotype at greater risk for bronchogenic carcinoma	118286007	morphology	C0206720
108330	P	Highinducibility phenotype at greater risk for bronchogenic carcinoma	254618003	disease	C0345942
108330	P	Highinducibility phenotype at greater risk for bronchogenic carcinoma	254622008	disease	C0345950
108330	P	Highinducibility phenotype at greater risk for bronchogenic carcinoma	93734005	disease	C0345950
108330	P	Highinducibility phenotype at greater risk for bronchogenic carcinoma	93986008	disease	C0346616
108330	P	Highinducibility phenotype at greater risk for bronchogenic carcinoma	94111002	disease	C0346955
108330	P	Highinducibility phenotype at greater risk for bronchogenic carcinoma	252988009	morphology	C0474799
108330	P	Highinducibility phenotype at greater risk for bronchogenic carcinoma	86049000	morphology	C0936282
108330	P	Highinducibility phenotype at greater risk for bronchogenic carcinoma	269469005	disease	C1261473
108330	P	Highinducibility phenotype at greater risk for bronchogenic carcinoma	367651003	morphology	C1288351
108330	P	Highinducibility phenotype at greater risk for bronchogenic carcinoma	126637008	disease	C1290306
108330	P	Highinducibility phenotype at greater risk for bronchogenic carcinoma	127331007	disease	C1290833
108330	P	Highinducibility phenotype at greater risk for bronchogenic carcinoma	372010005	disease	C1299302
108330	P	Highinducibility phenotype at greater risk for bronchogenic carcinoma	399879007	morphology	C1302694
108330	P	Highinducibility phenotype at greater risk for bronchogenic carcinoma	400155002	morphology	C1302853
108330	P	Highinducibility phenotype at greater risk for bronchogenic carcinoma	93986008	disease	C1304839
108330	P	Highinducibility phenotype at greater risk for bronchogenic carcinoma	94111002	disease	C1304852
108330	P	Highinducibility phenotype at greater risk for bronchogenic carcinoma	372087000	disease	C1306459
108330	P	Highinducibility phenotype at greater risk for bronchogenic carcinoma	86049000	morphology	C1306459
108330	P	Highinducibility phenotype at greater risk for bronchogenic carcinoma	254622008	disease	C1314696
108330	P	Highinducibility phenotype at greater risk for bronchogenic carcinoma	363493006	disease	C1322284
108330	P	Highinducibility phenotype at greater risk for bronchogenic carcinoma	93734005	disease	C1322284
109100	P	Autosomal dominant gene epistatic to other secondary genes conferring specificity to the autoimmune phenotype	363346000	disease	C0006826
109100	P	Autosomal dominant gene epistatic to other secondary genes conferring specificity to the autoimmune phenotype	14799000	morphology	C0013930
109100	P	Autosomal dominant gene epistatic to other secondary genes conferring specificity to the autoimmune phenotype	128462008	disease	C0027627
109100	P	Autosomal dominant gene epistatic to other secondary genes conferring specificity to the autoimmune phenotype	14799000	morphology	C0027627
109100	P	Autosomal dominant gene epistatic to other secondary genes conferring specificity to the autoimmune phenotype	367651003	morphology	C1288351
109350	A	ADENOCARCINOMA OF ESOPHAGUS, INCLUDED	35917007	morphology	C0001418
109350	A	ADENOCARCINOMA OF ESOPHAGUS, INCLUDED	363346000	disease	C0006826
109350	A	ADENOCARCINOMA OF ESOPHAGUS, INCLUDED	68453008	morphology	C0007097
109350	A	ADENOCARCINOMA OF ESOPHAGUS, INCLUDED	128348002	disease	C0012243
109350	A	ADENOCARCINOMA OF ESOPHAGUS, INCLUDED	128415001	disease	C0012243
109350	A	ADENOCARCINOMA OF ESOPHAGUS, INCLUDED	126817006	disease	C0014859
109350	A	ADENOCARCINOMA OF ESOPHAGUS, INCLUDED	126768004	disease	C0017185
109350	A	ADENOCARCINOMA OF ESOPHAGUS, INCLUDED	372138000	disease	C0152018
109350	A	ADENOCARCINOMA OF ESOPHAGUS, INCLUDED	118285006	morphology	C0205853
109350	A	ADENOCARCINOMA OF ESOPHAGUS, INCLUDED	276803003	disease	C0279628
109350	A	ADENOCARCINOMA OF ESOPHAGUS, INCLUDED	115215004	morphology	C0334275
109350	A	ADENOCARCINOMA OF ESOPHAGUS, INCLUDED	254532005	disease	C0345760
109350	A	ADENOCARCINOMA OF ESOPHAGUS, INCLUDED	255077007	disease	C0346617
109350	A	ADENOCARCINOMA OF ESOPHAGUS, INCLUDED	363402007	disease	C0546837
109350	A	ADENOCARCINOMA OF ESOPHAGUS, INCLUDED	86049000	morphology	C0936282
109350	A	ADENOCARCINOMA OF ESOPHAGUS, INCLUDED	367651003	morphology	C1288351
109350	A	ADENOCARCINOMA OF ESOPHAGUS, INCLUDED	127331007	disease	C1290833
109350	A	ADENOCARCINOMA OF ESOPHAGUS, INCLUDED	371984007	disease	C1300083
109350	A	ADENOCARCINOMA OF ESOPHAGUS, INCLUDED	399879007	morphology	C1302694
109350	A	ADENOCARCINOMA OF ESOPHAGUS, INCLUDED	399961007	morphology	C1302750
109350	A	ADENOCARCINOMA OF ESOPHAGUS, INCLUDED	372087000	disease	C1306459
109350	A	ADENOCARCINOMA OF ESOPHAGUS, INCLUDED	86049000	morphology	C1306459
109350	A	ADENOCARCINOMA OF ESOPHAGUS, INCLUDED	363745004	disease	C1306632
109400	T	BASAL CELL NEVUS SYNDROME	69408002	disease	C0004779
109400	T	BASAL CELL NEVUS SYNDROME	363346000	disease	C0006826
109400	A	NEVOID BASAL CELL CARCINOMA SYNDROME	68453008	morphology	C0007097
109400	T	BASAL CELL NEVUS SYNDROME	372130007	disease	C0007114
109400	T	BASAL CELL NEVUS SYNDROME	1338007	morphology	C0007117
109400	T	BASAL CELL NEVUS SYNDROME	254701007	disease	C0007117
109400	P	Cardiac fibroma	112682009	morphology	C0016045
109400	P	Medulloblastoma	115240006	morphology	C0017638
109400	T	BASAL CELL NEVUS SYNDROME	21119008	morphology	C0018508
109400	P	Medulloblastoma	83217000	morphology	C0025149
109400	T	BASAL CELL NEVUS SYNDROME	21119008	morphology	C0027960
109400	T	BASAL CELL NEVUS SYNDROME	21119008	morphology	C0027962
109400	T	BASAL CELL NEVUS SYNDROME	126488004	disease	C0037286
109400	T	BASAL CELL NEVUS SYNDROME	387837005	disease	C0037579
109400	T	BASAL CELL NEVUS SYNDROME	3898006	morphology	C0086692
109400	T	BASAL CELL NEVUS SYNDROME	118285006	morphology	C0205853
109400	P	Medulloblastoma	128928004	morphology	C0206754
109400	T	BASAL CELL NEVUS SYNDROME	55352002	disease	C0277576
109400	T	BASAL CELL NEVUS SYNDROME	254649008	disease	C0345976
109400	T	BASAL CELL NEVUS SYNDROME	254650008	disease	C0345977
109400	T	BASAL CELL NEVUS SYNDROME	239003009	disease	C0473571
109400	P	Medulloblastoma	253061008	morphology	C0474842
109400	P	Medulloblastoma	253062001	morphology	C0474843
109400	T	BASAL CELL NEVUS SYNDROME	115223002	morphology	C0476131
109400	P	Medulloblastoma	416500007	morphology	C0555198
109400	T	BASAL CELL NEVUS SYNDROME	86049000	morphology	C0936282
109400	P	Cardiac fibroma	115225009	morphology	C1261359
109400	T	BASAL CELL NEVUS SYNDROME	269469005	disease	C1261473
109400	T	BASAL CELL NEVUS SYNDROME	127570002	morphology	C1266008
109400	P	Medulloblastoma	127576008	morphology	C1266151
109400	P	Medulloblastoma	83217000	morphology	C1275668
109400	T	BASAL CELL NEVUS SYNDROME	367651003	morphology	C1288351
109400	T	BASAL CELL NEVUS SYNDROME	127331007	disease	C1290833
109400	T	BASAL CELL NEVUS SYNDROME	372010005	disease	C1299302
109400	T	BASAL CELL NEVUS SYNDROME	397195004	morphology	C1301273
109400	T	BASAL CELL NEVUS SYNDROME	399569002	morphology	C1302513
109400	T	BASAL CELL NEVUS SYNDROME	399879007	morphology	C1302694
109400	T	BASAL CELL NEVUS SYNDROME	400094003	morphology	C1302707
109400	P	Cardiac fibroma	400078005	morphology	C1302818
109400	T	BASAL CELL NEVUS SYNDROME	400137006	morphology	C1302845
109400	T	BASAL CELL NEVUS SYNDROME	400186008	disease	C1302872
109400	T	BASAL CELL NEVUS SYNDROME	372087000	disease	C1306459
109400	T	BASAL CELL NEVUS SYNDROME	86049000	morphology	C1306459
109400	T	BASAL CELL NEVUS SYNDROME	94047004	disease	C1314758
109400	T	BASAL CELL NEVUS SYNDROME	1338007	morphology	C1368275
109400	T	BASAL CELL NEVUS SYNDROME	252995000	morphology	C1368295
109400	T	BASAL CELL NEVUS SYNDROME	21119008	morphology	C1456781
109535	A	TUMOR NECROSIS FACTOR RECEPTOR SUPERFAMILY, MEMBER 5	86251006	morphology	C0027651
109535	A	TUMOR NECROSIS FACTOR RECEPTOR SUPERFAMILY, MEMBER 5	86251006	morphology	C0677041
109543	P	Bcell chronic lymphocytic leukemia (CLL)	363346000	disease	C0006826
109543	A	LEUKEMIA, CHRONIC LYMPHOCYTIC, BCELL	87163000	morphology	C0023418
109543	P	Bcell chronic lymphocytic leukemia (CLL)	93143009	disease	C0023418
109543	P	Bcell chronic lymphocytic leukemia (CLL)	188725004	disease	C0023448
109543	A	LEUKEMIA, CHRONIC LYMPHOCYTIC, BCELL	32280000	morphology	C0023448
109543	A	LEUKEMIA, CHRONIC LYMPHOCYTIC, BCELL	51092000	morphology	C0023458
109543	P	Bcell chronic lymphocytic leukemia (CLL)	92814006	disease	C0023458
109543	P	Bcell chronic lymphocytic leukemia (CLL)	92814006	disease	C0153877
109543	P	Bcell chronic lymphocytic leukemia (CLL)	269475001	disease	C0348393
109543	A	LEUKEMIA, CHRONIC LYMPHOCYTIC, BCELL	414388001	morphology	C0376544
109543	A	LEUKEMIA, CHRONIC LYMPHOCYTIC, BCELL	414644002	morphology	C0376544
109543	P	Bcell chronic lymphocytic leukemia (CLL)	129154003	disease	C0376545
109543	P	Bcell chronic lymphocytic leukemia (CLL)	269475001	disease	C0376545
109543	P	Bcell chronic lymphocytic leukemia (CLL)	277606000	disease	C0475799
109543	A	LEUKEMIA, CHRONIC LYMPHOCYTIC, BCELL	414628006	morphology	C0598798
109543	P	Bcell chronic lymphocytic leukemia (CLL)	93720005	disease	C0686582
109543	P	Bcell chronic lymphocytic leukemia (CLL)	92812005	disease	C0686588
109543	A	LEUKEMIA, CHRONIC LYMPHOCYTIC, BCELL	86049000	morphology	C0936282
109543	A	LEUKEMIA, CHRONIC LYMPHOCYTIC, BCELL	128933000	morphology	C1279296
109543	P	Bcell chronic lymphocytic leukemia (CLL)	92812005	disease	C1279296
109543	A	LEUKEMIA, CHRONIC LYMPHOCYTIC, BCELL	367651003	morphology	C1288351
109543	P	Bcell chronic lymphocytic leukemia (CLL)	127331007	disease	C1290833
109543	A	LEUKEMIA, CHRONIC LYMPHOCYTIC, BCELL	128935007	morphology	C1292765
109543	A	LEUKEMIA, CHRONIC LYMPHOCYTIC, BCELL	128931003	morphology	C1292766
109543	P	Bcell chronic lymphocytic leukemia (CLL)	372087000	disease	C1306459
109543	A	LEUKEMIA, CHRONIC LYMPHOCYTIC, BCELL	86049000	morphology	C1306459
109543	A	LEUKEMIA, CHRONIC LYMPHOCYTIC, BCELL	413616009	morphology	C1332362
109543	A	LEUKEMIA, CHRONIC LYMPHOCYTIC, BCELL	413840004	morphology	C1531666
109543	A	LEUKEMIA, CHRONIC LYMPHOCYTIC, BCELL	414654003	morphology	C1532008
109543	P	Bcell chronic lymphocytic leukemia (CLL)	414823004	disease	C1532167
109543	P	Bcell chronic lymphocytic leukemia (CLL)	414825006	disease	C1532168
109545	T	TUMOR NECROSIS FACTOR RECEPTOR SUPERFAMILY, MEMBER 17	86251006	morphology	C0027651
109545	T	TUMOR NECROSIS FACTOR RECEPTOR SUPERFAMILY, MEMBER 17	86251006	morphology	C0677041
109560	P	Chronic lymphocytic leukemia	363346000	disease	C0006826
109560	T	BCELL LEUKEMIA/LYMPHOMA 3	87163000	morphology	C0023418
109560	P	Chronic lymphocytic leukemia	93143009	disease	C0023418
109560	P	Chronic lymphocytic leukemia	32280000	morphology	C0023448
109560	P	Chronic lymphocytic leukemia	51092000	morphology	C0023458
109560	T	BCELL LEUKEMIA/LYMPHOMA 3	21964009	morphology	C0024299
109560	T	BCELL LEUKEMIA/LYMPHOMA 3	115244002	morphology	C0079734
109560	T	BCELL LEUKEMIA/LYMPHOMA 3	21964009	morphology	C0280803
109560	P	Chronic lymphocytic leukemia	269475001	disease	C0348393
109560	T	BCELL LEUKEMIA/LYMPHOMA 3	414388001	morphology	C0376544
109560	T	BCELL LEUKEMIA/LYMPHOMA 3	414644002	morphology	C0376544
109560	P	Chronic lymphocytic leukemia	129154003	disease	C0376545
109560	P	Chronic lymphocytic leukemia	269475001	disease	C0376545
109560	T	BCELL LEUKEMIA/LYMPHOMA 3	414628006	morphology	C0598798
109560	P	Chronic lymphocytic leukemia	93720005	disease	C0686582
109560	P	Chronic lymphocytic leukemia	92812005	disease	C0686588
109560	T	BCELL LEUKEMIA/LYMPHOMA 3	86049000	morphology	C0936282
109560	P	Chronic lymphocytic leukemia	128933000	morphology	C1279296
109560	P	Chronic lymphocytic leukemia	92812005	disease	C1279296
109560	T	BCELL LEUKEMIA/LYMPHOMA 3	367651003	morphology	C1288351
109560	P	Chronic lymphocytic leukemia	127331007	disease	C1290833
109560	P	Chronic lymphocytic leukemia	128935007	morphology	C1292765
109560	T	BCELL LEUKEMIA/LYMPHOMA 3	128931003	morphology	C1292766
109560	P	Chronic lymphocytic leukemia	372087000	disease	C1306459
109560	T	BCELL LEUKEMIA/LYMPHOMA 3	86049000	morphology	C1306459
109560	P	Chronic lymphocytic leukemia	413616009	morphology	C1332362
109560	P	Chronic lymphocytic leukemia	413840004	morphology	C1531666
109560	P	Chronic lymphocytic leukemia	414654003	morphology	C1532008
109560	P	Chronic lymphocytic leukemia	414823004	disease	C1532167
109560	P	Chronic lymphocytic leukemia	414825006	disease	C1532168
109565	T	BCELL LYMPHOMA 6	21964009	morphology	C0024299
109565	T	BCELL LYMPHOMA 6	115244002	morphology	C0079734
109565	T	BCELL LYMPHOMA 6	21964009	morphology	C0280803
109565	T	BCELL LYMPHOMA 6	414388001	morphology	C0376544
109565	T	BCELL LYMPHOMA 6	414644002	morphology	C0376544
109565	T	BCELL LYMPHOMA 6	414628006	morphology	C0598798
109565	T	BCELL LYMPHOMA 6	86049000	morphology	C0936282
109565	T	BCELL LYMPHOMA 6	367651003	morphology	C1288351
109565	T	BCELL LYMPHOMA 6	86049000	morphology	C1306459
109800	P	Transitional cell bladder carcinoma	128050000	disease	C0000735
109800	P	Transitional cell bladder carcinoma	399326009	disease	C0005684
109800	P	Transitional cell bladder carcinoma	93689003	disease	C0005684
109800	P	Transitional cell bladder carcinoma	126885006	disease	C0005695
109800	P	Transitional cell bladder carcinoma	363346000	disease	C0006826
109800	P	Transitional cell bladder carcinoma	68453008	morphology	C0007097
109800	P	Transitional cell bladder carcinoma	27090000	morphology	C0007138
109800	P	Transitional cell bladder carcinoma	126644004	disease	C0030793
109800	P	Transitional cell bladder carcinoma	126879004	disease	C0042076
109800	P	Transitional cell bladder carcinoma	254913005	disease	C0042076
109800	P	Transitional cell bladder carcinoma	188366002	disease	C0153662
109800	P	Transitional cell bladder carcinoma	363484005	disease	C0153663
109800	P	Transitional cell bladder carcinoma	93953009	disease	C0153663
109800	P	Transitional cell bladder carcinoma	271468000	disease	C0178251
109800	P	Transitional cell bladder carcinoma	118285006	morphology	C0205853
109800	P	Transitional cell bladder carcinoma	255109008	disease	C0279680
109800	P	Transitional cell bladder carcinoma	118287003	morphology	C0334265
109800	P	Transitional cell bladder carcinoma	255066001	disease	C0346554
109800	P	Transitional cell bladder carcinoma	94111002	disease	C0346955
109800	P	Transitional cell bladder carcinoma	255108000	disease	C0699885
109800	P	Transitional cell bladder carcinoma	363517008	disease	C0751571
109800	P	Transitional cell bladder carcinoma	94125001	disease	C0751571
109800	P	Transitional cell bladder carcinoma	86049000	morphology	C0936282
109800	P	Transitional cell bladder carcinoma	367651003	morphology	C1288351
109800	P	Transitional cell bladder carcinoma	126637008	disease	C1290306
109800	P	Transitional cell bladder carcinoma	127331007	disease	C1290833
109800	P	Transitional cell bladder carcinoma	399879007	morphology	C1302694
109800	P	Transitional cell bladder carcinoma	94111002	disease	C1304852
109800	P	Transitional cell bladder carcinoma	93953009	disease	C1306155
109800	P	Transitional cell bladder carcinoma	372087000	disease	C1306459
109800	P	Transitional cell bladder carcinoma	86049000	morphology	C1306459
109800	P	Transitional cell bladder carcinoma	94125001	disease	C1306549
109800	P	Transitional cell bladder carcinoma	93689003	disease	C1314699
109800	P	Transitional cell bladder carcinoma	118287003	morphology	C1384509
112200	P	Cerebellar medulloblastoma	115240006	morphology	C0017638
112200	T	BLUE RUBBER BLEB NEVUS	21119008	morphology	C0018508
112200	P	CNS hemangioma	2099007	morphology	C0018916
112200	P	CNS hemangioma	253053003	morphology	C0018916
112200	P	Cerebellar medulloblastoma	83217000	morphology	C0025149
112200	T	BLUE RUBBER BLEB NEVUS	21119008	morphology	C0027960
112200	T	BLUE RUBBER BLEB NEVUS	21119008	morphology	C0027962
112200	T	BLUE RUBBER BLEB NEVUS	3898006	morphology	C0086692
112200	T	BLUE RUBBER BLEB NEVUS	63166000	morphology	C0206736
112200	P	Cerebellar medulloblastoma	128928004	morphology	C0206754
112200	P	CNS hemangioma	115235003	morphology	C0282607
112200	P	Cerebellar medulloblastoma	253061008	morphology	C0474842
112200	P	Cerebellar medulloblastoma	253062001	morphology	C0474843
112200	T	BLUE RUBBER BLEB NEVUS	115223002	morphology	C0476131
112200	P	Cerebellar medulloblastoma	416500007	morphology	C0555198
112200	P	CNS hemangioma	2099007	morphology	C0677608
112200	P	CNS hemangioma	400110009	morphology	C0685121
112200	P	Cerebellar medulloblastoma	86049000	morphology	C0936282
112200	P	Cerebellar medulloblastoma	127576008	morphology	C1266151
112200	P	Cerebellar medulloblastoma	83217000	morphology	C1275668
112200	P	Cerebellar medulloblastoma	367651003	morphology	C1288351
112200	T	BLUE RUBBER BLEB NEVUS	397195004	morphology	C1301273
112200	T	BLUE RUBBER BLEB NEVUS	400094003	morphology	C1302707
112200	P	Cerebellar medulloblastoma	86049000	morphology	C1306459
112200	T	BLUE RUBBER BLEB NEVUS	21119008	morphology	C1456781
112250	T	DIAPHYSEAL MEDULLARY STENOSIS WITH MALIGNANT FIBROUS HISTIOCYTOMA	302843004	morphology	C0002991
112250	T	DIAPHYSEAL MEDULLARY STENOSIS WITH MALIGNANT FIBROUS HISTIOCYTOMA	72079004	morphology	C0002991
112250	A	BONE DYSPLASIA WITH MEDULLARY FIBROSARCOMA	53654007	morphology	C0016057
112250	T	DIAPHYSEAL MEDULLARY STENOSIS WITH MALIGNANT FIBROUS HISTIOCYTOMA	128741006	morphology	C0035290
112250	T	DIAPHYSEAL MEDULLARY STENOSIS WITH MALIGNANT FIBROUS HISTIOCYTOMA	3898006	morphology	C0086692
112250	T	DIAPHYSEAL MEDULLARY STENOSIS WITH MALIGNANT FIBROUS HISTIOCYTOMA	25889007	morphology	C0206644
112250	A	BONE DYSPLASIA WITH MEDULLARY FIBROSARCOMA	115224008	morphology	C0334449
112250	T	DIAPHYSEAL MEDULLARY STENOSIS WITH MALIGNANT FIBROUS HISTIOCYTOMA	34360000	morphology	C0334463
112250	T	DIAPHYSEAL MEDULLARY STENOSIS WITH MALIGNANT FIBROUS HISTIOCYTOMA	86049000	morphology	C0936282
112250	T	DIAPHYSEAL MEDULLARY STENOSIS WITH MALIGNANT FIBROUS HISTIOCYTOMA	115225009	morphology	C1261359
112250	T	DIAPHYSEAL MEDULLARY STENOSIS WITH MALIGNANT FIBROUS HISTIOCYTOMA	128741006	morphology	C1266125
112250	T	DIAPHYSEAL MEDULLARY STENOSIS WITH MALIGNANT FIBROUS HISTIOCYTOMA	367651003	morphology	C1288351
112250	A	BONE DYSPLASIA WITH MEDULLARY FIBROSARCOMA	372151005	morphology	C1299262
112250	T	DIAPHYSEAL MEDULLARY STENOSIS WITH MALIGNANT FIBROUS HISTIOCYTOMA	400007004	morphology	C1302774
112250	T	DIAPHYSEAL MEDULLARY STENOSIS WITH MALIGNANT FIBROUS HISTIOCYTOMA	400078005	morphology	C1302818
112250	T	DIAPHYSEAL MEDULLARY STENOSIS WITH MALIGNANT FIBROUS HISTIOCYTOMA	400163001	morphology	C1302856
112250	T	DIAPHYSEAL MEDULLARY STENOSIS WITH MALIGNANT FIBROUS HISTIOCYTOMA	400185007	morphology	C1302871
112250	T	DIAPHYSEAL MEDULLARY STENOSIS WITH MALIGNANT FIBROUS HISTIOCYTOMA	400212008	morphology	C1302888
112250	T	DIAPHYSEAL MEDULLARY STENOSIS WITH MALIGNANT FIBROUS HISTIOCYTOMA	86049000	morphology	C1306459
112250	T	DIAPHYSEAL MEDULLARY STENOSIS WITH MALIGNANT FIBROUS HISTIOCYTOMA	128741006	morphology	C1509147
112250	T	DIAPHYSEAL MEDULLARY STENOSIS WITH MALIGNANT FIBROUS HISTIOCYTOMA	302843004	morphology	C1509147
112250	T	DIAPHYSEAL MEDULLARY STENOSIS WITH MALIGNANT FIBROUS HISTIOCYTOMA	72079004	morphology	C1509147
112250	T	DIAPHYSEAL MEDULLARY STENOSIS WITH MALIGNANT FIBROUS HISTIOCYTOMA	72079004	morphology	C1509148
112250	T	DIAPHYSEAL MEDULLARY STENOSIS WITH MALIGNANT FIBROUS HISTIOCYTOMA	72079004	morphology	C1509149
113000	P	Delayed eruption of secondary teeth (homozygote 602337.0008)	363346000	disease	C0006826
113000	P	Delayed eruption of secondary teeth (homozygote 602337.0008)	14799000	morphology	C0013930
113000	P	Delayed eruption of secondary teeth (homozygote 602337.0008)	128462008	disease	C0027627
113000	P	Delayed eruption of secondary teeth (homozygote 602337.0008)	14799000	morphology	C0027627
113000	P	Delayed eruption of secondary teeth (homozygote 602337.0008)	367651003	morphology	C1288351
113620	P	Orbital dermoid cyst	72277008	morphology	C0011649
113620	P	Orbital dermoid cyst	3898006	morphology	C0086692
113620	P	Orbital dermoid cyst	115233005	morphology	C0205851
113705	T	BREAST CANCER 1 GENE	254837009	disease	C0006142
113705	T	BREAST CANCER 1 GENE	363346000	disease	C0006826
113705	VA	PAPILLARY SEROUS CARCINOMA OF THE PERITONEUM, INCLUDED	68453008	morphology	C0007097
113705	VA	PAPILLARY SEROUS CARCINOMA OF THE PERITONEUM, INCLUDED	25910003	morphology	C0007133
113705	T	BREAST CANCER 1 GENE	255058005	disease	C0039981
113705	T	BREAST CANCER 1 GENE	188361007	disease	C0153661
113705	VA	PAPILLARY SEROUS CARCINOMA OF THE PERITONEUM, INCLUDED	118285006	morphology	C0205853
113705	VA	PAPILLARY SEROUS CARCINOMA OF THE PERITONEUM, INCLUDED	90725004	morphology	C0206701
113705	VA	PAPILLARY SEROUS CARCINOMA OF THE PERITONEUM, INCLUDED	118286007	morphology	C0206720
113705	VA	PAPILLARY SEROUS CARCINOMA OF THE PERITONEUM, INCLUDED	252988009	morphology	C0474799
113705	VA	PAPILLARY SEROUS CARCINOMA OF THE PERITONEUM, INCLUDED	115217007	morphology	C0476127
113705	VA	PAPILLARY SEROUS CARCINOMA OF THE PERITONEUM, INCLUDED	86049000	morphology	C0936282
113705	T	BREAST CANCER 1 GENE	367651003	morphology	C1288351
113705	T	BREAST CANCER 1 GENE	126637008	disease	C1290306
113705	T	BREAST CANCER 1 GENE	127331007	disease	C1290833
113705	VA	PAPILLARY SEROUS CARCINOMA OF THE PERITONEUM, INCLUDED	399879007	morphology	C1302694
113705	VA	PAPILLARY SEROUS CARCINOMA OF THE PERITONEUM, INCLUDED	400155002	morphology	C1302853
113705	VA	PAPILLARY SEROUS CARCINOMA OF THE PERITONEUM, INCLUDED	86049000	morphology	C1306459
113705	T	BREAST CANCER 1 GENE	126926005	disease	C1458155
113710	A	BREAST CANCER ESTROGENINDUCIBLE SEQUENCE	254837009	disease	C0006142
113710	A	BREAST CANCER ESTROGENINDUCIBLE SEQUENCE	363346000	disease	C0006826
113710	A	BREAST CANCER ESTROGENINDUCIBLE SEQUENCE	255058005	disease	C0039981
113710	A	BREAST CANCER ESTROGENINDUCIBLE SEQUENCE	188361007	disease	C0153661
113710	A	BREAST CANCER ESTROGENINDUCIBLE SEQUENCE	86049000	morphology	C0936282
113710	A	BREAST CANCER ESTROGENINDUCIBLE SEQUENCE	367651003	morphology	C1288351
113710	A	BREAST CANCER ESTROGENINDUCIBLE SEQUENCE	126637008	disease	C1290306
113710	A	BREAST CANCER ESTROGENINDUCIBLE SEQUENCE	127331007	disease	C1290833
113710	A	BREAST CANCER ESTROGENINDUCIBLE SEQUENCE	86049000	morphology	C1306459
113710	A	BREAST CANCER ESTROGENINDUCIBLE SEQUENCE	126926005	disease	C1458155
113721	A	BREAST CANCER SUPPRESSOR	254837009	disease	C0006142
113721	A	BREAST CANCER SUPPRESSOR	363346000	disease	C0006826
113721	A	BREAST CANCER SUPPRESSOR	255058005	disease	C0039981
113721	A	BREAST CANCER SUPPRESSOR	188361007	disease	C0153661
113721	A	BREAST CANCER SUPPRESSOR	86049000	morphology	C0936282
113721	A	BREAST CANCER SUPPRESSOR	367651003	morphology	C1288351
113721	A	BREAST CANCER SUPPRESSOR	126637008	disease	C1290306
113721	A	BREAST CANCER SUPPRESSOR	127331007	disease	C1290833
113721	A	BREAST CANCER SUPPRESSOR	86049000	morphology	C1306459
113721	A	BREAST CANCER SUPPRESSOR	126926005	disease	C1458155
113970	T	BURKITT LYMPHOMA	397400006	morphology	C0006413
113970	T	BURKITT LYMPHOMA	77381001	morphology	C0006413
113970	T	BURKITT LYMPHOMA	21964009	morphology	C0024299
113970	T	BURKITT LYMPHOMA	128929007	morphology	C0024305
113970	T	BURKITT LYMPHOMA	115244002	morphology	C0079734
113970	T	BURKITT LYMPHOMA	21964009	morphology	C0280803
113970	T	BURKITT LYMPHOMA	414388001	morphology	C0376544
113970	T	BURKITT LYMPHOMA	414644002	morphology	C0376544
113970	T	BURKITT LYMPHOMA	414628006	morphology	C0598798
113970	T	BURKITT LYMPHOMA	86049000	morphology	C0936282
113970	T	BURKITT LYMPHOMA	314922006	morphology	C1282448
113970	T	BURKITT LYMPHOMA	367651003	morphology	C1288351
113970	T	BURKITT LYMPHOMA	86049000	morphology	C1306459
113970	T	BURKITT LYMPHOMA	413616009	morphology	C1332362
113970	T	BURKITT LYMPHOMA	77381001	morphology	C1368771
113970	T	BURKITT LYMPHOMA	414654003	morphology	C1532008
114030	P	No neurofibromas	115242003	morphology	C0027830
114030	P	No neurofibromas	404029005	disease	C0027830
114030	P	No neurofibromas	89084002	morphology	C0027830
114030	P	No neurofibromas	20376005	disease	C0086692
114030	P	No neurofibromas	3898006	morphology	C0086692
114030	P	No neurofibromas	115242003	morphology	C0206727
114030	P	No neurofibromas	253061008	morphology	C0474842
114030	P	No neurofibromas	402874001	disease	C1274306
114030	P	No neurofibromas	402875000	disease	C1274307
114030	P	No neurofibromas	400193007	morphology	C1302876
114065	P	Extensive aortic medial necrosis with secondary calcification of elastic tissue without evidence of previous inflammation or other destructive or reparative processes	363346000	disease	C0006826
114065	P	Extensive aortic medial necrosis with secondary calcification of elastic tissue without evidence of previous inflammation or other destructive or reparative processes	14799000	morphology	C0013930
114065	P	Extensive aortic medial necrosis with secondary calcification of elastic tissue without evidence of previous inflammation or other destructive or reparative processes	128462008	disease	C0027627
114065	P	Extensive aortic medial necrosis with secondary calcification of elastic tissue without evidence of previous inflammation or other destructive or reparative processes	14799000	morphology	C0027627
114065	P	Extensive aortic medial necrosis with secondary calcification of elastic tissue without evidence of previous inflammation or other destructive or reparative processes	367651003	morphology	C1288351
114290	P	Majority die in neonatal period secondary to respiratory insufficiency	363346000	disease	C0006826
114290	P	Majority die in neonatal period secondary to respiratory insufficiency	14799000	morphology	C0013930
114290	P	Majority die in neonatal period secondary to respiratory insufficiency	128462008	disease	C0027627
114290	P	Majority die in neonatal period secondary to respiratory insufficiency	14799000	morphology	C0027627
114290	P	Majority die in neonatal period secondary to respiratory insufficiency	367651003	morphology	C1288351
114400	P	Breast cancer with ovarian cancer, sarcoma, brain tumors, leukemia, or gastrointestinal cancer	128050000	disease	C0000735
114400	P	Breast cancer with ovarian cancer, sarcoma, brain tumors, leukemia, or gastrointestinal cancer	254935002	disease	C0006118
114400	P	Breast cancer with ovarian cancer, sarcoma, brain tumors, leukemia, or gastrointestinal cancer	254837009	disease	C0006142
114400	P	Breast cancer with ovarian cancer, sarcoma, brain tumors, leukemia, or gastrointestinal cancer	363346000	disease	C0006826
114400	P	Primary colon (esp. right colon) and endometrial carcinoma	68453008	morphology	C0007097
114400	P	Primary colon (esp. right colon) and endometrial carcinoma	363406005	disease	C0007102
114400	P	Primary colon (esp. right colon) and endometrial carcinoma	93761005	disease	C0007102
114400	P	Primary colon (esp. right colon) and endometrial carcinoma	93781006	disease	C0007103
114400	P	Primary colon (esp. right colon) and endometrial carcinoma	126838000	disease	C0009375
114400	P	Primary colon (esp. right colon) and endometrial carcinoma	126837005	disease	C0009404
114400	P	Increased gastric cancer	128348002	disease	C0012243
114400	P	Increased gastric cancer	128415001	disease	C0012243
114400	P	Primary colon (esp. right colon) and endometrial carcinoma	123844007	disease	C0014170
114400	P	Increased gastric cancer	126768004	disease	C0017185
114400	P	Breast cancer with ovarian cancer, sarcoma, brain tumors, leukemia, or gastrointestinal cancer	126907002	disease	C0017416
114400	P	Breast cancer with ovarian cancer, sarcoma, brain tumors, leukemia, or gastrointestinal cancer	255055008	disease	C0018671
114400	P	Breast cancer with ovarian cancer, sarcoma, brain tumors, leukemia, or gastrointestinal cancer	126631009	disease	C0018675
114400	P	Primary colon (esp. right colon) and endometrial carcinoma	126769007	disease	C0021841
114400	P	Breast cancer with ovarian cancer, sarcoma, brain tumors, leukemia, or gastrointestinal cancer	87163000	morphology	C0023418
114400	P	Breast cancer with ovarian cancer, sarcoma, brain tumors, leukemia, or gastrointestinal cancer	93143009	disease	C0023418
114400	P	Increased gastric cancer	363349007	disease	C0024623
114400	P	Breast cancer with ovarian cancer, sarcoma, brain tumors, leukemia, or gastrointestinal cancer	86251006	morphology	C0027651
114400	P	Breast cancer with ovarian cancer, sarcoma, brain tumors, leukemia, or gastrointestinal cancer	126950007	disease	C0027766
114400	P	Breast cancer with ovarian cancer, sarcoma, brain tumors, leukemia, or gastrointestinal cancer	126644004	disease	C0030793
114400	P	Increased gastric cancer	126824007	disease	C0038356
114400	P	Breast cancer with ovarian cancer, sarcoma, brain tumors, leukemia, or gastrointestinal cancer	255058005	disease	C0039981
114400	P	Primary colon (esp. right colon) and endometrial carcinoma	126908007	disease	C0042138
114400	P	Breast cancer with ovarian cancer, sarcoma, brain tumors, leukemia, or gastrointestinal cancer	126951006	disease	C0085136
114400	P	Primary colon (esp. right colon) and endometrial carcinoma	371973000	disease	C0153567
114400	P	Primary colon (esp. right colon) and endometrial carcinoma	371972005	disease	C0153574
114400	P	Primary colon (esp. right colon) and endometrial carcinoma	363514001	disease	C0153592
114400	P	Breast cancer with ovarian cancer, sarcoma, brain tumors, leukemia, or gastrointestinal cancer	188361007	disease	C0153661
114400	P	Increased gastric cancer	188366002	disease	C0153662
114400	P	Primary colon (esp. right colon) and endometrial carcinoma	363484005	disease	C0153663
114400	P	Primary colon (esp. right colon) and endometrial carcinoma	93953009	disease	C0153663
114400	P	Primary colon (esp. right colon) and endometrial carcinoma	271468000	disease	C0178251
114400	P	Primary colon (esp. right colon) and endometrial carcinoma	118285006	morphology	C0205853
114400	P	Breast cancer with ovarian cancer, sarcoma, brain tumors, leukemia, or gastrointestinal cancer	115224008	morphology	C0334449
114400	P	Increased gastric cancer	254532005	disease	C0345760
114400	P	Increased gastric cancer	255077007	disease	C0346617
114400	P	Primary colon (esp. right colon) and endometrial carcinoma	363508008	disease	C0346627
114400	P	Primary colon (esp. right colon) and endometrial carcinoma	363510005	disease	C0346629
114400	P	Primary colon (esp. right colon) and endometrial carcinoma	93854002	disease	C0346629
114400	P	Primary colon (esp. right colon) and endometrial carcinoma	188192002	disease	C0346874
114400	P	Primary colon (esp. right colon) and endometrial carcinoma	94111002	disease	C0346955
114400	P	Breast cancer with ovarian cancer, sarcoma, brain tumors, leukemia, or gastrointestinal cancer	269475001	disease	C0348393
114400	P	Breast cancer with ovarian cancer, sarcoma, brain tumors, leukemia, or gastrointestinal cancer	278050001	disease	C0349667
114400	P	Breast cancer with ovarian cancer, sarcoma, brain tumors, leukemia, or gastrointestinal cancer	414388001	morphology	C0376544
114400	P	Breast cancer with ovarian cancer, sarcoma, brain tumors, leukemia, or gastrointestinal cancer	414644002	morphology	C0376544
114400	P	Breast cancer with ovarian cancer, sarcoma, brain tumors, leukemia, or gastrointestinal cancer	129154003	disease	C0376545
114400	P	Breast cancer with ovarian cancer, sarcoma, brain tumors, leukemia, or gastrointestinal cancer	269475001	disease	C0376545
114400	P	Primary colon (esp. right colon) and endometrial carcinoma	254878006	disease	C0476089
114400	P	Primary colon (esp. right colon) and endometrial carcinoma	93781006	disease	C0476089
114400	P	Breast cancer with ovarian cancer, sarcoma, brain tumors, leukemia, or gastrointestinal cancer	86251006	morphology	C0677041
114400	P	Primary colon (esp. right colon) and endometrial carcinoma	93839008	disease	C0684842
114400	P	Breast cancer with ovarian cancer, sarcoma, brain tumors, leukemia, or gastrointestinal cancer	93720005	disease	C0686582
114400	P	Primary colon (esp. right colon) and endometrial carcinoma	269533000	disease	C0699790
114400	P	Breast cancer with ovarian cancer, sarcoma, brain tumors, leukemia, or gastrointestinal cancer	123843001	disease	C0919267
114400	P	Breast cancer with ovarian cancer, sarcoma, brain tumors, leukemia, or gastrointestinal cancer	86049000	morphology	C0936282
114400	P	Breast cancer with ovarian cancer, sarcoma, brain tumors, leukemia, or gastrointestinal cancer	2424003	morphology	C1261473
114400	P	Primary colon (esp. right colon) and endometrial carcinoma	126909004	disease	C1263777
114400	P	Breast cancer with ovarian cancer, sarcoma, brain tumors, leukemia, or gastrointestinal cancer	126915004	disease	C1263786
114400	P	Breast cancer with ovarian cancer, sarcoma, brain tumors, leukemia, or gastrointestinal cancer	367651003	morphology	C1288351
114400	P	Breast cancer with ovarian cancer, sarcoma, brain tumors, leukemia, or gastrointestinal cancer	126637008	disease	C1290306
114400	P	Increased gastric cancer	126643005	disease	C1290312
114400	P	Breast cancer with ovarian cancer, sarcoma, brain tumors, leukemia, or gastrointestinal cancer	127331007	disease	C1290833
114400	P	Breast cancer with ovarian cancer, sarcoma, brain tumors, leukemia, or gastrointestinal cancer	128931003	morphology	C1292766
114400	P	Breast cancer with ovarian cancer, sarcoma, brain tumors, leukemia, or gastrointestinal cancer	372151005	morphology	C1299262
114400	P	Primary colon (esp. right colon) and endometrial carcinoma	371971003	disease	C1299275
114400	P	Primary colon (esp. right colon) and endometrial carcinoma	371992003	disease	C1299288
114400	P	Primary colon (esp. right colon) and endometrial carcinoma	399879007	morphology	C1302694
114400	P	Primary colon (esp. right colon) and endometrial carcinoma	93761005	disease	C1304819
114400	P	Primary colon (esp. right colon) and endometrial carcinoma	94111002	disease	C1304852
114400	P	Primary colon (esp. right colon) and endometrial carcinoma	93953009	disease	C1306155
114400	P	Breast cancer with ovarian cancer, sarcoma, brain tumors, leukemia, or gastrointestinal cancer	372087000	disease	C1306459
114400	P	Breast cancer with ovarian cancer, sarcoma, brain tumors, leukemia, or gastrointestinal cancer	86049000	morphology	C1306459
114400	P	Primary colon (esp. right colon) and endometrial carcinoma	93854002	disease	C1306548
114400	P	Primary colon (esp. right colon) and endometrial carcinoma	363745004	disease	C1306632
114400	P	Breast cancer with ovarian cancer, sarcoma, brain tumors, leukemia, or gastrointestinal cancer	126926005	disease	C1458155
114400	P	Breast cancer with ovarian cancer, sarcoma, brain tumors, leukemia, or gastrointestinal cancer	254935002	disease	C1527390
114400	P	Breast cancer with ovarian cancer, sarcoma, brain tumors, leukemia, or gastrointestinal cancer	414823004	disease	C1532167
114400	P	Breast cancer with ovarian cancer, sarcoma, brain tumors, leukemia, or gastrointestinal cancer	414825006	disease	C1532168
114400	P	Primary colon (esp. right colon) and endometrial carcinoma	93797001	disease	C1536885
114450	T	CANCER, FAMILIAL, WITH IN VITRO RADIORESISTANCE	363346000	disease	C0006826
114450	P	Possible radiogenic tumor origin	86251006	morphology	C0027651
114450	P	Possible radiogenic tumor origin	86251006	morphology	C0677041
114450	T	CANCER, FAMILIAL, WITH IN VITRO RADIORESISTANCE	86049000	morphology	C0936282
114450	T	CANCER, FAMILIAL, WITH IN VITRO RADIORESISTANCE	367651003	morphology	C1288351
114450	T	CANCER, FAMILIAL, WITH IN VITRO RADIORESISTANCE	86049000	morphology	C1306459
114480	A	BREAST CANCER, FAMILIAL BREAST CANCER, FAMILIAL MALE, INCLUDED	254837009	disease	C0006142
114480	A	BREAST CANCER, FAMILIAL BREAST CANCER, FAMILIAL MALE, INCLUDED	363346000	disease	C0006826
114480	P	Breast carcinoma	68453008	morphology	C0007097
114480	P	Caused by mutations in the tumor protein p53 gene (TP53, 191170.0023)	86251006	morphology	C0027651
114480	A	BREAST CANCER, FAMILIAL BREAST CANCER, FAMILIAL MALE, INCLUDED	255058005	disease	C0039981
114480	A	BREAST CANCER, FAMILIAL BREAST CANCER, FAMILIAL MALE, INCLUDED	188361007	disease	C0153661
114480	P	Breast carcinoma	118285006	morphology	C0205853
114480	A	BREAST CANCER, FAMILIAL BREAST CANCER, FAMILIAL MALE, INCLUDED	55352002	disease	C0277576
114480	A	BREAST CANCER, FAMILIAL BREAST CANCER, FAMILIAL MALE, INCLUDED	254843006	disease	C0346153
114480	P	Breast carcinoma	94111002	disease	C0346955
114480	P	Caused by mutations in the tumor protein p53 gene (TP53, 191170.0023)	86251006	morphology	C0677041
114480	P	Breast carcinoma	254838004	disease	C0678222
114480	P	Breast carcinoma	86049000	morphology	C0936282
114480	A	BREAST CANCER, FAMILIAL BREAST CANCER, FAMILIAL MALE, INCLUDED	367651003	morphology	C1288351
114480	A	BREAST CANCER, FAMILIAL BREAST CANCER, FAMILIAL MALE, INCLUDED	126637008	disease	C1290306
114480	A	BREAST CANCER, FAMILIAL BREAST CANCER, FAMILIAL MALE, INCLUDED	127331007	disease	C1290833
114480	P	Breast carcinoma	372137005	disease	C1299258
114480	P	Breast carcinoma	399879007	morphology	C1302694
114480	P	Breast carcinoma	94111002	disease	C1304852
114480	P	Breast carcinoma	372087000	disease	C1306459
114480	P	Breast carcinoma	86049000	morphology	C1306459
114480	A	BREAST CANCER, FAMILIAL BREAST CANCER, FAMILIAL MALE, INCLUDED	126926005	disease	C1458155
114500	A	COLON CANCER	128050000	disease	C0000735
114500	P	Associated endometrial carcinoma, atypical endometrial hyperplasia, uterine leiomyosarcoma, bladder transitional carcinoma, gastric, biliary and renal cell carcinoma	399326009	disease	C0005684
114500	P	Associated endometrial carcinoma, atypical endometrial hyperplasia, uterine leiomyosarcoma, bladder transitional carcinoma, gastric, biliary and renal cell carcinoma	93689003	disease	C0005684
114500	P	Associated endometrial carcinoma, atypical endometrial hyperplasia, uterine leiomyosarcoma, bladder transitional carcinoma, gastric, biliary and renal cell carcinoma	126885006	disease	C0005695
114500	A	COLON CANCER	363346000	disease	C0006826
114500	P	Associated endometrial carcinoma, atypical endometrial hyperplasia, uterine leiomyosarcoma, bladder transitional carcinoma, gastric, biliary and renal cell carcinoma	68453008	morphology	C0007097
114500	A	COLON CANCER	363406005	disease	C0007102
114500	P	Associated endometrial carcinoma, atypical endometrial hyperplasia, uterine leiomyosarcoma, bladder transitional carcinoma, gastric, biliary and renal cell carcinoma	93781006	disease	C0007103
114500	P	Associated endometrial carcinoma, atypical endometrial hyperplasia, uterine leiomyosarcoma, bladder transitional carcinoma, gastric, biliary and renal cell carcinoma	254915003	disease	C0007134
114500	P	Associated endometrial carcinoma, atypical endometrial hyperplasia, uterine leiomyosarcoma, bladder transitional carcinoma, gastric, biliary and renal cell carcinoma	41607009	morphology	C0007134
114500	P	Associated endometrial carcinoma, atypical endometrial hyperplasia, uterine leiomyosarcoma, bladder transitional carcinoma, gastric, biliary and renal cell carcinoma	27090000	morphology	C0007138
114500	A	COLON CANCER	126838000	disease	C0009375
114500	A	COLON CANCER	126837005	disease	C0009404
114500	A	COLON CANCER	128348002	disease	C0012243
114500	A	COLON CANCER	128415001	disease	C0012243
114500	P	Associated endometrial carcinoma, atypical endometrial hyperplasia, uterine leiomyosarcoma, bladder transitional carcinoma, gastric, biliary and renal cell carcinoma	123844007	disease	C0014170
114500	A	COLON CANCER	126768004	disease	C0017185
114500	P	Associated endometrial carcinoma, atypical endometrial hyperplasia, uterine leiomyosarcoma, bladder transitional carcinoma, gastric, biliary and renal cell carcinoma	126907002	disease	C0017416
114500	A	COLON CANCER	126769007	disease	C0021841
114500	P	Associated endometrial carcinoma, atypical endometrial hyperplasia, uterine leiomyosarcoma, bladder transitional carcinoma, gastric, biliary and renal cell carcinoma	126880001	disease	C0022665
114500	P	Associated endometrial carcinoma, atypical endometrial hyperplasia, uterine leiomyosarcoma, bladder transitional carcinoma, gastric, biliary and renal cell carcinoma	51549004	morphology	C0023269
114500	P	Associated endometrial carcinoma, atypical endometrial hyperplasia, uterine leiomyosarcoma, bladder transitional carcinoma, gastric, biliary and renal cell carcinoma	363349007	disease	C0024623
114500	P	Associated endometrial carcinoma, atypical endometrial hyperplasia, uterine leiomyosarcoma, bladder transitional carcinoma, gastric, biliary and renal cell carcinoma	126644004	disease	C0030793
114500	P	Associated endometrial carcinoma, atypical endometrial hyperplasia, uterine leiomyosarcoma, bladder transitional carcinoma, gastric, biliary and renal cell carcinoma	126872008	disease	C0035358
114500	P	Associated endometrial carcinoma, atypical endometrial hyperplasia, uterine leiomyosarcoma, bladder transitional carcinoma, gastric, biliary and renal cell carcinoma	126824007	disease	C0038356
114500	P	Associated endometrial carcinoma, atypical endometrial hyperplasia, uterine leiomyosarcoma, bladder transitional carcinoma, gastric, biliary and renal cell carcinoma	126879004	disease	C0042076
114500	P	Associated endometrial carcinoma, atypical endometrial hyperplasia, uterine leiomyosarcoma, bladder transitional carcinoma, gastric, biliary and renal cell carcinoma	254913005	disease	C0042076
114500	P	Associated endometrial carcinoma, atypical endometrial hyperplasia, uterine leiomyosarcoma, bladder transitional carcinoma, gastric, biliary and renal cell carcinoma	126908007	disease	C0042138
114500	P	Associated endometrial carcinoma, atypical endometrial hyperplasia, uterine leiomyosarcoma, bladder transitional carcinoma, gastric, biliary and renal cell carcinoma	363420003	disease	C0153465
114500	P	Associated endometrial carcinoma, atypical endometrial hyperplasia, uterine leiomyosarcoma, bladder transitional carcinoma, gastric, biliary and renal cell carcinoma	94092006	disease	C0153465
114500	P	Associated endometrial carcinoma, atypical endometrial hyperplasia, uterine leiomyosarcoma, bladder transitional carcinoma, gastric, biliary and renal cell carcinoma	371973000	disease	C0153567
114500	P	Associated endometrial carcinoma, atypical endometrial hyperplasia, uterine leiomyosarcoma, bladder transitional carcinoma, gastric, biliary and renal cell carcinoma	371972005	disease	C0153574
114500	P	Associated endometrial carcinoma, atypical endometrial hyperplasia, uterine leiomyosarcoma, bladder transitional carcinoma, gastric, biliary and renal cell carcinoma	363514001	disease	C0153592
114500	A	COLON CANCER	188366002	disease	C0153662
114500	P	Associated endometrial carcinoma, atypical endometrial hyperplasia, uterine leiomyosarcoma, bladder transitional carcinoma, gastric, biliary and renal cell carcinoma	363484005	disease	C0153663
114500	P	Associated endometrial carcinoma, atypical endometrial hyperplasia, uterine leiomyosarcoma, bladder transitional carcinoma, gastric, biliary and renal cell carcinoma	93953009	disease	C0153663
114500	P	Associated endometrial carcinoma, atypical endometrial hyperplasia, uterine leiomyosarcoma, bladder transitional carcinoma, gastric, biliary and renal cell carcinoma	271468000	disease	C0178251
114500	P	Associated endometrial carcinoma, atypical endometrial hyperplasia, uterine leiomyosarcoma, bladder transitional carcinoma, gastric, biliary and renal cell carcinoma	118285006	morphology	C0205853
114500	P	Associated endometrial carcinoma, atypical endometrial hyperplasia, uterine leiomyosarcoma, bladder transitional carcinoma, gastric, biliary and renal cell carcinoma	30546008	morphology	C0206681
114500	P	Associated endometrial carcinoma, atypical endometrial hyperplasia, uterine leiomyosarcoma, bladder transitional carcinoma, gastric, biliary and renal cell carcinoma	255109008	disease	C0279680
114500	P	Associated endometrial carcinoma, atypical endometrial hyperplasia, uterine leiomyosarcoma, bladder transitional carcinoma, gastric, biliary and renal cell carcinoma	254915003	disease	C0279702
114500	P	Associated endometrial carcinoma, atypical endometrial hyperplasia, uterine leiomyosarcoma, bladder transitional carcinoma, gastric, biliary and renal cell carcinoma	115228006	morphology	C0282606
114500	P	Associated endometrial carcinoma, atypical endometrial hyperplasia, uterine leiomyosarcoma, bladder transitional carcinoma, gastric, biliary and renal cell carcinoma	118287003	morphology	C0334265
114500	P	Associated endometrial carcinoma, atypical endometrial hyperplasia, uterine leiomyosarcoma, bladder transitional carcinoma, gastric, biliary and renal cell carcinoma	115215004	morphology	C0334275
114500	P	Associated endometrial carcinoma, atypical endometrial hyperplasia, uterine leiomyosarcoma, bladder transitional carcinoma, gastric, biliary and renal cell carcinoma	115224008	morphology	C0334449
114500	A	COLON CANCER	254532005	disease	C0345760
114500	P	Associated endometrial carcinoma, atypical endometrial hyperplasia, uterine leiomyosarcoma, bladder transitional carcinoma, gastric, biliary and renal cell carcinoma	188250002	disease	C0346248
114500	P	Associated endometrial carcinoma, atypical endometrial hyperplasia, uterine leiomyosarcoma, bladder transitional carcinoma, gastric, biliary and renal cell carcinoma	255066001	disease	C0346554
114500	A	COLON CANCER	255077007	disease	C0346617
114500	A	COLON CANCER	363508008	disease	C0346627
114500	A	COLON CANCER	363510005	disease	C0346629
114500	P	Associated endometrial carcinoma, atypical endometrial hyperplasia, uterine leiomyosarcoma, bladder transitional carcinoma, gastric, biliary and renal cell carcinoma	188192002	disease	C0346874
114500	P	Associated endometrial carcinoma, atypical endometrial hyperplasia, uterine leiomyosarcoma, bladder transitional carcinoma, gastric, biliary and renal cell carcinoma	94111002	disease	C0346955
114500	P	Associated endometrial carcinoma, atypical endometrial hyperplasia, uterine leiomyosarcoma, bladder transitional carcinoma, gastric, biliary and renal cell carcinoma	253046007	morphology	C0474829
114500	P	Associated endometrial carcinoma, atypical endometrial hyperplasia, uterine leiomyosarcoma, bladder transitional carcinoma, gastric, biliary and renal cell carcinoma	254878006	disease	C0476089
114500	P	Associated endometrial carcinoma, atypical endometrial hyperplasia, uterine leiomyosarcoma, bladder transitional carcinoma, gastric, biliary and renal cell carcinoma	93781006	disease	C0476089
114500	P	Associated endometrial carcinoma, atypical endometrial hyperplasia, uterine leiomyosarcoma, bladder transitional carcinoma, gastric, biliary and renal cell carcinoma	93839008	disease	C0684842
114500	P	Associated endometrial carcinoma, atypical endometrial hyperplasia, uterine leiomyosarcoma, bladder transitional carcinoma, gastric, biliary and renal cell carcinoma	372143007	disease	C0699791
114500	P	Associated endometrial carcinoma, atypical endometrial hyperplasia, uterine leiomyosarcoma, bladder transitional carcinoma, gastric, biliary and renal cell carcinoma	255108000	disease	C0699885
114500	P	Associated endometrial carcinoma, atypical endometrial hyperplasia, uterine leiomyosarcoma, bladder transitional carcinoma, gastric, biliary and renal cell carcinoma	363518003	disease	C0740457
114500	P	Associated endometrial carcinoma, atypical endometrial hyperplasia, uterine leiomyosarcoma, bladder transitional carcinoma, gastric, biliary and renal cell carcinoma	93849006	disease	C0740457
114500	P	Associated endometrial carcinoma, atypical endometrial hyperplasia, uterine leiomyosarcoma, bladder transitional carcinoma, gastric, biliary and renal cell carcinoma	363517008	disease	C0751571
114500	P	Associated endometrial carcinoma, atypical endometrial hyperplasia, uterine leiomyosarcoma, bladder transitional carcinoma, gastric, biliary and renal cell carcinoma	94125001	disease	C0751571
114500	P	Associated endometrial carcinoma, atypical endometrial hyperplasia, uterine leiomyosarcoma, bladder transitional carcinoma, gastric, biliary and renal cell carcinoma	86049000	morphology	C0936282
114500	P	Associated endometrial carcinoma, atypical endometrial hyperplasia, uterine leiomyosarcoma, bladder transitional carcinoma, gastric, biliary and renal cell carcinoma	126909004	disease	C1263777
114500	A	COLON CANCER	367651003	morphology	C1288351
114500	A	COLON CANCER	126637008	disease	C1290306
114500	A	COLON CANCER	126643005	disease	C1290312
114500	A	COLON CANCER	127331007	disease	C1290833
114500	P	Associated endometrial carcinoma, atypical endometrial hyperplasia, uterine leiomyosarcoma, bladder transitional carcinoma, gastric, biliary and renal cell carcinoma	372151005	morphology	C1299262
114500	P	Associated endometrial carcinoma, atypical endometrial hyperplasia, uterine leiomyosarcoma, bladder transitional carcinoma, gastric, biliary and renal cell carcinoma	371971003	disease	C1299275
114500	P	Associated endometrial carcinoma, atypical endometrial hyperplasia, uterine leiomyosarcoma, bladder transitional carcinoma, gastric, biliary and renal cell carcinoma	372014001	disease	C1299305
114500	P	Associated endometrial carcinoma, atypical endometrial hyperplasia, uterine leiomyosarcoma, bladder transitional carcinoma, gastric, biliary and renal cell carcinoma	399879007	morphology	C1302694
114500	P	Associated endometrial carcinoma, atypical endometrial hyperplasia, uterine leiomyosarcoma, bladder transitional carcinoma, gastric, biliary and renal cell carcinoma	399950004	morphology	C1302742
114500	P	Associated endometrial carcinoma, atypical endometrial hyperplasia, uterine leiomyosarcoma, bladder transitional carcinoma, gastric, biliary and renal cell carcinoma	399961007	morphology	C1302750
114500	P	Associated endometrial carcinoma, atypical endometrial hyperplasia, uterine leiomyosarcoma, bladder transitional carcinoma, gastric, biliary and renal cell carcinoma	400011005	morphology	C1302775
114500	P	Associated endometrial carcinoma, atypical endometrial hyperplasia, uterine leiomyosarcoma, bladder transitional carcinoma, gastric, biliary and renal cell carcinoma	94111002	disease	C1304852
114500	P	Associated endometrial carcinoma, atypical endometrial hyperplasia, uterine leiomyosarcoma, bladder transitional carcinoma, gastric, biliary and renal cell carcinoma	93849006	disease	C1306058
114500	P	Associated endometrial carcinoma, atypical endometrial hyperplasia, uterine leiomyosarcoma, bladder transitional carcinoma, gastric, biliary and renal cell carcinoma	94092006	disease	C1306094
114500	P	Associated endometrial carcinoma, atypical endometrial hyperplasia, uterine leiomyosarcoma, bladder transitional carcinoma, gastric, biliary and renal cell carcinoma	93953009	disease	C1306155
114500	P	Associated endometrial carcinoma, atypical endometrial hyperplasia, uterine leiomyosarcoma, bladder transitional carcinoma, gastric, biliary and renal cell carcinoma	372087000	disease	C1306459
114500	P	Associated endometrial carcinoma, atypical endometrial hyperplasia, uterine leiomyosarcoma, bladder transitional carcinoma, gastric, biliary and renal cell carcinoma	86049000	morphology	C1306459
114500	P	Associated endometrial carcinoma, atypical endometrial hyperplasia, uterine leiomyosarcoma, bladder transitional carcinoma, gastric, biliary and renal cell carcinoma	94125001	disease	C1306549
114500	P	Associated endometrial carcinoma, atypical endometrial hyperplasia, uterine leiomyosarcoma, bladder transitional carcinoma, gastric, biliary and renal cell carcinoma	363745004	disease	C1306632
114500	P	Associated endometrial carcinoma, atypical endometrial hyperplasia, uterine leiomyosarcoma, bladder transitional carcinoma, gastric, biliary and renal cell carcinoma	93689003	disease	C1314699
114500	P	Associated endometrial carcinoma, atypical endometrial hyperplasia, uterine leiomyosarcoma, bladder transitional carcinoma, gastric, biliary and renal cell carcinoma	254915003	disease	C1378703
114500	P	Associated endometrial carcinoma, atypical endometrial hyperplasia, uterine leiomyosarcoma, bladder transitional carcinoma, gastric, biliary and renal cell carcinoma	118287003	morphology	C1384509
114500	P	Associated endometrial carcinoma, atypical endometrial hyperplasia, uterine leiomyosarcoma, bladder transitional carcinoma, gastric, biliary and renal cell carcinoma	93797001	disease	C1536885
114500	P	Associated endometrial carcinoma, atypical endometrial hyperplasia, uterine leiomyosarcoma, bladder transitional carcinoma, gastric, biliary and renal cell carcinoma	417339005	morphology	C1562079
114550	T	HEPATOCELLULAR CARCINOMA	128050000	disease	C0000735
114550	T	HEPATOCELLULAR CARCINOMA	363346000	disease	C0006826
114550	T	HEPATOCELLULAR CARCINOMA	68453008	morphology	C0007097
114550	T	HEPATOCELLULAR CARCINOMA	128348002	disease	C0012243
114550	T	HEPATOCELLULAR CARCINOMA	109841003	disease	C0019204
114550	T	HEPATOCELLULAR CARCINOMA	126851005	disease	C0019204
114550	T	HEPATOCELLULAR CARCINOMA	25370001	morphology	C0019204
114550	T	HEPATOCELLULAR CARCINOMA	126851005	disease	C0023903
114550	T	HEPATOCELLULAR CARCINOMA	93870000	disease	C0024620
114550	T	HEPATOCELLULAR CARCINOMA	95214007	disease	C0024620
114550	P	Associated with mutations in the p53 tumor protein gene (TP53, 191170.0006)	86251006	morphology	C0027651
114550	T	HEPATOCELLULAR CARCINOMA	188366002	disease	C0153662
114550	T	HEPATOCELLULAR CARCINOMA	118285006	morphology	C0205853
114550	T	HEPATOCELLULAR CARCINOMA	115215004	morphology	C0334275
114550	T	HEPATOCELLULAR CARCINOMA	254532005	disease	C0345760
114550	T	HEPATOCELLULAR CARCINOMA	93870000	disease	C0345904
114550	T	HEPATOCELLULAR CARCINOMA	255077007	disease	C0346617
114550	T	HEPATOCELLULAR CARCINOMA	94111002	disease	C0346955
114550	T	HEPATOCELLULAR CARCINOMA	253016009	morphology	C0474812
114550	P	Associated with mutations in the p53 tumor protein gene (TP53, 191170.0006)	86251006	morphology	C0677041
114550	T	HEPATOCELLULAR CARCINOMA	93839008	disease	C0684842
114550	T	HEPATOCELLULAR CARCINOMA	86049000	morphology	C0936282
114550	T	HEPATOCELLULAR CARCINOMA	408646000	disease	C0948680
114550	T	HEPATOCELLULAR CARCINOMA	367651003	morphology	C1288351
114550	T	HEPATOCELLULAR CARCINOMA	126637008	disease	C1290306
114550	T	HEPATOCELLULAR CARCINOMA	126643005	disease	C1290312
114550	T	HEPATOCELLULAR CARCINOMA	127331007	disease	C1290833
114550	T	HEPATOCELLULAR CARCINOMA	399879007	morphology	C1302694
114550	T	HEPATOCELLULAR CARCINOMA	399961007	morphology	C1302750
114550	T	HEPATOCELLULAR CARCINOMA	94111002	disease	C1304852
114550	T	HEPATOCELLULAR CARCINOMA	372087000	disease	C1306459
114550	T	HEPATOCELLULAR CARCINOMA	86049000	morphology	C1306459
114835	P	Increased frequency of CES1 deficiency in nonHodgkin lymphoma (NHL) and Bcell chronic lymphocytic leukemia (CLL)	363346000	disease	C0006826
114835	P	Increased frequency of CES1 deficiency in nonHodgkin lymphoma (NHL) and Bcell chronic lymphocytic leukemia (CLL)	87163000	morphology	C0023418
114835	P	Increased frequency of CES1 deficiency in nonHodgkin lymphoma (NHL) and Bcell chronic lymphocytic leukemia (CLL)	93143009	disease	C0023418
114835	P	Increased frequency of CES1 deficiency in nonHodgkin lymphoma (NHL) and Bcell chronic lymphocytic leukemia (CLL)	188725004	disease	C0023448
114835	P	Increased frequency of CES1 deficiency in nonHodgkin lymphoma (NHL) and Bcell chronic lymphocytic leukemia (CLL)	32280000	morphology	C0023448
114835	P	Increased frequency of CES1 deficiency in nonHodgkin lymphoma (NHL) and Bcell chronic lymphocytic leukemia (CLL)	51092000	morphology	C0023458
114835	P	Increased frequency of CES1 deficiency in nonHodgkin lymphoma (NHL) and Bcell chronic lymphocytic leukemia (CLL)	92814006	disease	C0023458
114835	P	Increased frequency of CES1 deficiency in nonHodgkin lymphoma (NHL) and Bcell chronic lymphocytic leukemia (CLL)	118600007	disease	C0024299
114835	P	Increased frequency of CES1 deficiency in nonHodgkin lymphoma (NHL) and Bcell chronic lymphocytic leukemia (CLL)	21964009	morphology	C0024299
114835	P	Increased frequency of CES1 deficiency in nonHodgkin lymphoma (NHL) and Bcell chronic lymphocytic leukemia (CLL)	115244002	morphology	C0079734
114835	P	Increased frequency of CES1 deficiency in nonHodgkin lymphoma (NHL) and Bcell chronic lymphocytic leukemia (CLL)	92814006	disease	C0153877
114835	P	Increased frequency of CES1 deficiency in nonHodgkin lymphoma (NHL) and Bcell chronic lymphocytic leukemia (CLL)	21964009	morphology	C0280803
114835	P	Increased frequency of CES1 deficiency in nonHodgkin lymphoma (NHL) and Bcell chronic lymphocytic leukemia (CLL)	269475001	disease	C0348393
114835	P	Increased frequency of CES1 deficiency in nonHodgkin lymphoma (NHL) and Bcell chronic lymphocytic leukemia (CLL)	414388001	morphology	C0376544
114835	P	Increased frequency of CES1 deficiency in nonHodgkin lymphoma (NHL) and Bcell chronic lymphocytic leukemia (CLL)	414644002	morphology	C0376544
114835	P	Increased frequency of CES1 deficiency in nonHodgkin lymphoma (NHL) and Bcell chronic lymphocytic leukemia (CLL)	129154003	disease	C0376545
114835	P	Increased frequency of CES1 deficiency in nonHodgkin lymphoma (NHL) and Bcell chronic lymphocytic leukemia (CLL)	269475001	disease	C0376545
114835	P	Increased frequency of CES1 deficiency in nonHodgkin lymphoma (NHL) and Bcell chronic lymphocytic leukemia (CLL)	277606000	disease	C0475799
114835	P	Increased frequency of CES1 deficiency in nonHodgkin lymphoma (NHL) and Bcell chronic lymphocytic leukemia (CLL)	414628006	morphology	C0598798
114835	P	Increased frequency of CES1 deficiency in nonHodgkin lymphoma (NHL) and Bcell chronic lymphocytic leukemia (CLL)	93720005	disease	C0686582
114835	P	Increased frequency of CES1 deficiency in nonHodgkin lymphoma (NHL) and Bcell chronic lymphocytic leukemia (CLL)	92812005	disease	C0686588
114835	P	Increased frequency of CES1 deficiency in nonHodgkin lymphoma (NHL) and Bcell chronic lymphocytic leukemia (CLL)	302841002	disease	C0855095
114835	P	Increased frequency of CES1 deficiency in nonHodgkin lymphoma (NHL) and Bcell chronic lymphocytic leukemia (CLL)	86049000	morphology	C0936282
114835	P	Increased frequency of CES1 deficiency in nonHodgkin lymphoma (NHL) and Bcell chronic lymphocytic leukemia (CLL)	128933000	morphology	C1279296
114835	P	Increased frequency of CES1 deficiency in nonHodgkin lymphoma (NHL) and Bcell chronic lymphocytic leukemia (CLL)	92812005	disease	C1279296
114835	P	Increased frequency of CES1 deficiency in nonHodgkin lymphoma (NHL) and Bcell chronic lymphocytic leukemia (CLL)	367651003	morphology	C1288351
114835	P	Increased frequency of CES1 deficiency in nonHodgkin lymphoma (NHL) and Bcell chronic lymphocytic leukemia (CLL)	127331007	disease	C1290833
114835	P	Increased frequency of CES1 deficiency in nonHodgkin lymphoma (NHL) and Bcell chronic lymphocytic leukemia (CLL)	128935007	morphology	C1292765
114835	P	Increased frequency of CES1 deficiency in nonHodgkin lymphoma (NHL) and Bcell chronic lymphocytic leukemia (CLL)	128931003	morphology	C1292766
114835	P	Increased frequency of CES1 deficiency in nonHodgkin lymphoma (NHL) and Bcell chronic lymphocytic leukemia (CLL)	372087000	disease	C1306459
114835	P	Increased frequency of CES1 deficiency in nonHodgkin lymphoma (NHL) and Bcell chronic lymphocytic leukemia (CLL)	86049000	morphology	C1306459
114835	P	Increased frequency of CES1 deficiency in nonHodgkin lymphoma (NHL) and Bcell chronic lymphocytic leukemia (CLL)	413616009	morphology	C1332362
114835	P	Increased frequency of CES1 deficiency in nonHodgkin lymphoma (NHL) and Bcell chronic lymphocytic leukemia (CLL)	413840004	morphology	C1531666
114835	P	Increased frequency of CES1 deficiency in nonHodgkin lymphoma (NHL) and Bcell chronic lymphocytic leukemia (CLL)	414654003	morphology	C1532008
114835	P	Increased frequency of CES1 deficiency in nonHodgkin lymphoma (NHL) and Bcell chronic lymphocytic leukemia (CLL)	414823004	disease	C1532167
114835	P	Increased frequency of CES1 deficiency in nonHodgkin lymphoma (NHL) and Bcell chronic lymphocytic leukemia (CLL)	414825006	disease	C1532168
114890	P	Increased carcinoembryonic antigen in adenocarcinomas of endodermally derived digestive system epithelia	35917007	morphology	C0001418
114890	P	CEA immunoassay useful in diagnosis and serial monitoring of cancer patients for recurrent disease or response to therapy, esp. in colonic cancer	363346000	disease	C0006826
114890	P	Increased carcinoembryonic antigen in adenocarcinomas of endodermally derived digestive system epithelia	118285006	morphology	C0205853
114890	P	Increased carcinoembryonic antigen in adenocarcinomas of endodermally derived digestive system epithelia	115215004	morphology	C0334275
114890	P	Increased carcinoembryonic antigen in adenocarcinomas of endodermally derived digestive system epithelia	86049000	morphology	C0936282
114890	P	CEA immunoassay useful in diagnosis and serial monitoring of cancer patients for recurrent disease or response to therapy, esp. in colonic cancer	367651003	morphology	C1288351
114890	P	Increased carcinoembryonic antigen in adenocarcinomas of endodermally derived digestive system epithelia	399879007	morphology	C1302694
114890	P	Increased carcinoembryonic antigen in adenocarcinomas of endodermally derived digestive system epithelia	399961007	morphology	C1302750
114890	P	Increased carcinoembryonic antigen in adenocarcinomas of endodermally derived digestive system epithelia	86049000	morphology	C1306459
114900	T	CARCINOID TUMORS, INTESTINAL	189607006	morphology	C0007095
114900	T	CARCINOID TUMORS, INTESTINAL	86251006	morphology	C0027651
114900	T	CARCINOID TUMORS, INTESTINAL	118285006	morphology	C0205853
114900	T	CARCINOID TUMORS, INTESTINAL	128928004	morphology	C0206754
114900	T	CARCINOID TUMORS, INTESTINAL	115215004	morphology	C0334275
114900	T	CARCINOID TUMORS, INTESTINAL	252998003	morphology	C0474803
114900	T	CARCINOID TUMORS, INTESTINAL	86251006	morphology	C0677041
115150	P	Cavernous hemangioma	2099007	morphology	C0018916
115150	P	Cavernous hemangioma	253053003	morphology	C0018916
115150	P	Cavernous hemangioma	33377007	morphology	C0018920
115150	P	Cavernous hemangioma	3898006	morphology	C0086692
115150	P	Cavernous hemangioma	115235003	morphology	C0282607
115150	P	Caused by mutation in the VKiRas2 Kirsten rat sarcoma 2 viral oncogene homolog gene (KRAS, 190070.0009)	115224008	morphology	C0334449
115150	P	Cavernous hemangioma	2099007	morphology	C0677608
115150	P	Cavernous hemangioma	400110009	morphology	C0685121
115150	P	Caused by mutation in the VKiRas2 Kirsten rat sarcoma 2 viral oncogene homolog gene (KRAS, 190070.0009)	86049000	morphology	C0936282
115150	P	Caused by mutation in the VKiRas2 Kirsten rat sarcoma 2 viral oncogene homolog gene (KRAS, 190070.0009)	2424003	morphology	C1261473
115150	P	Caused by mutation in the VKiRas2 Kirsten rat sarcoma 2 viral oncogene homolog gene (KRAS, 190070.0009)	367651003	morphology	C1288351
115150	P	Caused by mutation in the VKiRas2 Kirsten rat sarcoma 2 viral oncogene homolog gene (KRAS, 190070.0009)	372151005	morphology	C1299262
115150	P	Caused by mutation in the VKiRas2 Kirsten rat sarcoma 2 viral oncogene homolog gene (KRAS, 190070.0009)	86049000	morphology	C1306459
115250	A	CONNECTIVE TISSUE NEVUS, INCLUDED	21119008	morphology	C0018508
115250	A	CONNECTIVE TISSUE NEVUS, INCLUDED	21119008	morphology	C0027960
115250	A	CONNECTIVE TISSUE NEVUS, INCLUDED	21119008	morphology	C0027962
115250	A	CONNECTIVE TISSUE NEVUS, INCLUDED	3898006	morphology	C0086692
115250	A	CONNECTIVE TISSUE NEVUS, INCLUDED	115223002	morphology	C0476131
115250	A	CONNECTIVE TISSUE NEVUS, INCLUDED	397195004	morphology	C1301273
115250	A	CONNECTIVE TISSUE NEVUS, INCLUDED	400094003	morphology	C1302707
115250	A	CONNECTIVE TISSUE NEVUS, INCLUDED	21119008	morphology	C1456781
115310	A	CAROTID BODY TUMORS AND MULTIPLE EXTRAADRENAL PHEOCHROMOCYTOMAS	128050000	disease	C0000735
115310	A	CAROTID BODY TUMORS AND MULTIPLE EXTRAADRENAL PHEOCHROMOCYTOMAS	127021009	disease	C0001624
115310	P	Renal cell carcinoma (less common)	363346000	disease	C0006826
115310	P	Renal cell carcinoma (less common)	68453008	morphology	C0007097
115310	P	Renal cell carcinoma (less common)	254915003	disease	C0007134
115310	P	Renal cell carcinoma (less common)	41607009	morphology	C0007134
115310	A	CAROTID BODY TUMORS AND MULTIPLE EXTRAADRENAL PHEOCHROMOCYTOMAS	30699005	morphology	C0007279
115310	A	CAROTID BODY TUMORS AND MULTIPLE EXTRAADRENAL PHEOCHROMOCYTOMAS	387922007	disease	C0014132
115310	A	CAROTID BODY TUMORS AND MULTIPLE EXTRAADRENAL PHEOCHROMOCYTOMAS	387927001	disease	C0014132
115310	P	Glomus jugular tumors	10438002	morphology	C0017653
115310	P	Glomus jugular tumors	403969002	disease	C0017653
115310	P	Renal cell carcinoma (less common)	126880001	disease	C0022665
115310	T	PARAGANGLIOMAS 4	86251006	morphology	C0027651
115310	T	PARAGANGLIOMAS 4	302833002	disease	C0030421
115310	T	PARAGANGLIOMAS 4	803009	morphology	C0030421
115310	P	Pulsatile tinnitus (tympanic paraganglioma)	302834008	disease	C0030422
115310	A	PARAGANGLIOMAS, HEREDITARY EXTRAADRENAL	51747000	morphology	C0030422
115310	P	Renal cell carcinoma (less common)	126644004	disease	C0030793
115310	A	CAROTID BODY TUMORS AND MULTIPLE EXTRAADRENAL PHEOCHROMOCYTOMAS	302835009	disease	C0031511
115310	A	CAROTID BODY TUMORS AND MULTIPLE EXTRAADRENAL PHEOCHROMOCYTOMAS	85583005	morphology	C0031511
115310	A	CAROTID BODY TUMORS AND MULTIPLE EXTRAADRENAL PHEOCHROMOCYTOMAS	126872008	disease	C0035358
115310	P	Renal cell carcinoma (less common)	126879004	disease	C0042076
115310	P	Glomus jugular tumors	20376005	disease	C0086692
115310	P	Glomus jugular tumors	3898006	morphology	C0086692
115310	P	Renal cell carcinoma (less common)	363420003	disease	C0153465
115310	P	Renal cell carcinoma (less common)	94092006	disease	C0153465
115310	P	Renal cell carcinoma (less common)	188366002	disease	C0153662
115310	P	Renal cell carcinoma (less common)	363484005	disease	C0153663
115310	P	Renal cell carcinoma (less common)	93953009	disease	C0153663
115310	T	PARAGANGLIOMAS 4	118616009	disease	C0154129
115310	P	Renal cell carcinoma (less common)	271468000	disease	C0178251
115310	P	Renal cell carcinoma (less common)	118285006	morphology	C0205853
115310	P	Renal cell carcinoma (less common)	30546008	morphology	C0206681
115310	T	PARAGANGLIOMAS 4	128928004	morphology	C0206754
115310	T	PARAGANGLIOMAS 4	255046005	disease	C0206754
115310	P	Renal cell carcinoma (less common)	254915003	disease	C0279702
115310	P	Renal cell carcinoma (less common)	115215004	morphology	C0334275
115310	P	Renal cell carcinoma (less common)	188250002	disease	C0346248
115310	P	Glomus jugular tumors	255047001	disease	C0346416
115310	P	Renal cell carcinoma (less common)	94111002	disease	C0346955
115310	P	Pulsatile tinnitus (tympanic paraganglioma)	253031000	disease	C0474820
115310	T	PARAGANGLIOMAS 4	115222007	morphology	C0476130
115310	T	PARAGANGLIOMAS 4	86251006	morphology	C0677041
115310	P	Renal cell carcinoma (less common)	93839008	disease	C0684842
115310	P	Renal cell carcinoma (less common)	363518003	disease	C0740457
115310	P	Renal cell carcinoma (less common)	93849006	disease	C0740457
115310	P	Renal cell carcinoma (less common)	94125001	disease	C0751571
115310	A	PARAGANGLIOMA, FAMILIAL MALIGNANT	86049000	morphology	C0936282
115310	A	PARAGANGLIOMA, FAMILIAL MALIGNANT	127576008	morphology	C1266151
115310	A	PARAGANGLIOMA, FAMILIAL MALIGNANT	367651003	morphology	C1288351
115310	A	CAROTID BODY TUMORS AND MULTIPLE EXTRAADRENAL PHEOCHROMOCYTOMAS	126637008	disease	C1290306
115310	A	CAROTID BODY TUMORS AND MULTIPLE EXTRAADRENAL PHEOCHROMOCYTOMAS	126643005	disease	C1290312
115310	A	CAROTID BODY TUMORS AND MULTIPLE EXTRAADRENAL PHEOCHROMOCYTOMAS	127331007	disease	C1290833
115310	A	CAROTID BODY TUMORS AND MULTIPLE EXTRAADRENAL PHEOCHROMOCYTOMAS	399258001	morphology	C1302282
115310	P	Renal cell carcinoma (less common)	399879007	morphology	C1302694
115310	P	Renal cell carcinoma (less common)	399961007	morphology	C1302750
115310	P	Glomus jugular tumors	400103003	morphology	C1302832
115310	P	Renal cell carcinoma (less common)	94111002	disease	C1304852
115310	P	Renal cell carcinoma (less common)	93849006	disease	C1306058
115310	P	Renal cell carcinoma (less common)	94092006	disease	C1306094
115310	P	Renal cell carcinoma (less common)	93953009	disease	C1306155
115310	A	PARAGANGLIOMAS, HEREDITARY EXTRAADRENAL	51747000	morphology	C1306262
115310	P	Renal cell carcinoma (less common)	372087000	disease	C1306459
115310	A	PARAGANGLIOMA, FAMILIAL MALIGNANT	86049000	morphology	C1306459
115310	P	Renal cell carcinoma (less common)	94125001	disease	C1306549
115310	P	Renal cell carcinoma (less common)	254915003	disease	C1378703
115310	A	PARAGANGLIOMA, FAMILIAL MALIGNANT	9903002	morphology	C1533592
115310	P	Renal cell carcinoma (less common)	417339005	morphology	C1562079
116806	AV	HEPATOCELLULAR CARCINOMA, SOMATIC	128050000	disease	C0000735
116806	AV	PILOMATRICOMA, SOMATIC	92384009	disease	C0004998
116806	AV	HEPATOCELLULAR CARCINOMA, SOMATIC	363346000	disease	C0006826
116806	AV	HEPATOCELLULAR CARCINOMA, SOMATIC	68453008	morphology	C0007097
116806	AV	HEPATOCELLULAR CARCINOMA, SOMATIC	128348002	disease	C0012243
116806	VA	MEDULLOBLASTOMA, SOMATIC, INCLUDED	115240006	morphology	C0017638
116806	AV	HEPATOCELLULAR CARCINOMA, SOMATIC	109841003	disease	C0019204
116806	AV	HEPATOCELLULAR CARCINOMA, SOMATIC	126851005	disease	C0019204
116806	AV	HEPATOCELLULAR CARCINOMA, SOMATIC	25370001	morphology	C0019204
116806	AV	HEPATOCELLULAR CARCINOMA, SOMATIC	126851005	disease	C0023903
116806	AV	HEPATOCELLULAR CARCINOMA, SOMATIC	93870000	disease	C0024620
116806	AV	HEPATOCELLULAR CARCINOMA, SOMATIC	95214007	disease	C0024620
116806	VA	MEDULLOBLASTOMA, SOMATIC, INCLUDED	83217000	morphology	C0025149
116806	VA	DESMOID TUMOR, SOMATIC, INCLUDED	86251006	morphology	C0027651
116806	AV	PILOMATRICOMA, SOMATIC	126488004	disease	C0037286
116806	AV	PILOMATRICOMA, SOMATIC	387837005	disease	C0037579
116806	VA	DESMOID TUMOR, SOMATIC, INCLUDED	47284001	morphology	C0079218
116806	AV	PILOMATRICOMA, SOMATIC	20376005	disease	C0086692
116806	AV	PILOMATRICOMA, SOMATIC	3898006	morphology	C0086692
116806	AV	HEPATOCELLULAR CARCINOMA, SOMATIC	188366002	disease	C0153662
116806	AV	HEPATOCELLULAR CARCINOMA, SOMATIC	118285006	morphology	C0205853
116806	AV	HEPATOBLASTOMA, SOMATIC	45024009	morphology	C0206624
116806	AV	OVARIAN CARCINOMA, ENDOMETRIOID TYPE, SOMATIC	30289006	morphology	C0206687
116806	AV	PILOMATRICOMA, SOMATIC	274901004	disease	C0206711
116806	AV	PILOMATRICOMA, SOMATIC	44155009	morphology	C0206711
116806	VA	MEDULLOBLASTOMA, SOMATIC, INCLUDED	128928004	morphology	C0206754
116806	AV	HEPATOCELLULAR CARCINOMA, SOMATIC	115215004	morphology	C0334275
116806	AV	PILOMATRICOMA, SOMATIC	92069005	disease	C0334450
116806	AV	HEPATOCELLULAR CARCINOMA, SOMATIC	254532005	disease	C0345760
116806	AV	HEPATOCELLULAR CARCINOMA, SOMATIC	93870000	disease	C0345904
116806	AV	PILOMATRICOMA, SOMATIC	254649008	disease	C0345976
116806	AV	PILOMATRICOMA, SOMATIC	254658001	disease	C0345981
116806	AV	PILOMATRICOMA, SOMATIC	126489007	disease	C0345988
116806	AV	PILOMATRICOMA, SOMATIC	254691005	disease	C0346003
116806	AV	HEPATOCELLULAR CARCINOMA, SOMATIC	255077007	disease	C0346617
116806	AV	HEPATOCELLULAR CARCINOMA, SOMATIC	94111002	disease	C0346955
116806	AV	PILOMATRICOMA, SOMATIC	91965004	disease	C0347391
116806	AV	PILOMATRICOMA, SOMATIC	276739001	disease	C0349509
116806	VA	DESMOID TUMOR, SOMATIC, INCLUDED	47284001	morphology	C0410005
116806	AV	PILOMATRICOMA, SOMATIC	252996004	morphology	C0474802
116806	AV	OVARIAN CARCINOMA, ENDOMETRIOID TYPE, SOMATIC	253013001	morphology	C0474809
116806	AV	OVARIAN CARCINOMA, ENDOMETRIOID TYPE, SOMATIC	253014007	morphology	C0474810
116806	AV	HEPATOCELLULAR CARCINOMA, SOMATIC	253016009	morphology	C0474812
116806	VA	MEDULLOBLASTOMA, SOMATIC, INCLUDED	253061008	morphology	C0474842
116806	VA	MEDULLOBLASTOMA, SOMATIC, INCLUDED	253062001	morphology	C0474843
116806	AV	HEPATOBLASTOMA, SOMATIC	115229003	morphology	C0476141
116806	VA	MEDULLOBLASTOMA, SOMATIC, INCLUDED	416500007	morphology	C0555198
116806	VA	DESMOID TUMOR, SOMATIC, INCLUDED	86251006	morphology	C0677041
116806	AV	HEPATOCELLULAR CARCINOMA, SOMATIC	93839008	disease	C0684842
116806	AV	PILOMATRICOMA, SOMATIC	44155009	morphology	C0859920
116806	AV	HEPATOBLASTOMA, SOMATIC	86049000	morphology	C0936282
116806	AV	HEPATOCELLULAR CARCINOMA, SOMATIC	408646000	disease	C0948680
116806	VA	DESMOID TUMOR, SOMATIC, INCLUDED	115225009	morphology	C1261359
116806	AV	PILOMATRICOMA, SOMATIC	127570002	morphology	C1266008
116806	AV	PILOMATRICOMA, SOMATIC	115216003	morphology	C1266061
116806	VA	MEDULLOBLASTOMA, SOMATIC, INCLUDED	127576008	morphology	C1266151
116806	VA	MEDULLOBLASTOMA, SOMATIC, INCLUDED	83217000	morphology	C1275668
116806	AV	PILOMATRICOMA, SOMATIC	314932004	morphology	C1282458
116806	AV	HEPATOBLASTOMA, SOMATIC	367651003	morphology	C1288351
116806	AV	HEPATOCELLULAR CARCINOMA, SOMATIC	126637008	disease	C1290306
116806	AV	HEPATOCELLULAR CARCINOMA, SOMATIC	126643005	disease	C1290312
116806	AV	HEPATOCELLULAR CARCINOMA, SOMATIC	127331007	disease	C1290833
116806	AV	HEPATOCELLULAR CARCINOMA, SOMATIC	399879007	morphology	C1302694
116806	AV	PILOMATRICOMA, SOMATIC	399942008	morphology	C1302735
116806	AV	HEPATOCELLULAR CARCINOMA, SOMATIC	399961007	morphology	C1302750
116806	VA	DESMOID TUMOR, SOMATIC, INCLUDED	399991002	morphology	C1302767
116806	AV	PILOMATRICOMA, SOMATIC	400050009	morphology	C1302799
116806	AV	PILOMATRICOMA, SOMATIC	400186008	disease	C1302872
116806	AV	PILOMATRICOMA, SOMATIC	400207007	morphology	C1302886
116806	AV	HEPATOCELLULAR CARCINOMA, SOMATIC	94111002	disease	C1304852
116806	AV	HEPATOCELLULAR CARCINOMA, SOMATIC	372087000	disease	C1306459
116806	AV	HEPATOBLASTOMA, SOMATIC	86049000	morphology	C1306459
116806	AV	OVARIAN CARCINOMA, ENDOMETRIOID TYPE, SOMATIC	30289006	morphology	C1569637
116860	A	CAVERNOUS ANGIOMA, FAMILIAL	2099007	morphology	C0018916
116860	A	CAVERNOUS ANGIOMA, FAMILIAL	253053003	morphology	C0018916
116860	A	HEMANGIOMA, CAVERNOUS, OF BRAIN	33377007	morphology	C0018920
116860	A	CAVERNOUS ANGIOMA, FAMILIAL	3898006	morphology	C0086692
116860	A	CAVERNOUS ANGIOMA, FAMILIAL	115235003	morphology	C0282607
116860	A	CAVERNOUS ANGIOMA, FAMILIAL	2099007	morphology	C0677608
116860	A	CAVERNOUS ANGIOMA, FAMILIAL	400110009	morphology	C0685121
116897	AV	LEUKEMIA, ACUTE MYELOID	363346000	disease	C0006826
116897	AV	LEUKEMIA, ACUTE MYELOID	87163000	morphology	C0023418
116897	AV	LEUKEMIA, ACUTE MYELOID	93143009	disease	C0023418
116897	AV	LEUKEMIA, ACUTE MYELOID	17788007	morphology	C0023467
116897	AV	LEUKEMIA, ACUTE MYELOID	413443009	morphology	C0023467
116897	AV	LEUKEMIA, ACUTE MYELOID	91861009	disease	C0023467
116897	AV	LEUKEMIA, ACUTE MYELOID	128934006	morphology	C0023470
116897	AV	LEUKEMIA, ACUTE MYELOID	188732008	disease	C0023470
116897	AV	LEUKEMIA, ACUTE MYELOID	37810007	morphology	C0023470
116897	AV	LEUKEMIA, ACUTE MYELOID	37810007	morphology	C0027019
116897	AV	LEUKEMIA, ACUTE MYELOID	414792005	morphology	C0027022
116897	AV	LEUKEMIA, ACUTE MYELOID	24072005	morphology	C0085669
116897	AV	LEUKEMIA, ACUTE MYELOID	91855006	disease	C0085669
116897	AV	LEUKEMIA, ACUTE MYELOID	91861009	disease	C0153885
116897	AV	LEUKEMIA, ACUTE MYELOID	37810007	morphology	C0206142
116897	AV	LEUKEMIA, ACUTE MYELOID	269475001	disease	C0348393
116897	AV	LEUKEMIA, ACUTE MYELOID	37810007	morphology	C0349640
116897	AV	LEUKEMIA, ACUTE MYELOID	414388001	morphology	C0376544
116897	AV	LEUKEMIA, ACUTE MYELOID	414644002	morphology	C0376544
116897	AV	LEUKEMIA, ACUTE MYELOID	129154003	disease	C0376545
116897	AV	LEUKEMIA, ACUTE MYELOID	269475001	disease	C0376545
116897	AV	LEUKEMIA, ACUTE MYELOID	37810007	morphology	C0598894
116897	AV	LEUKEMIA, ACUTE MYELOID	93720005	disease	C0686582
116897	AV	LEUKEMIA, ACUTE MYELOID	91855006	disease	C0686587
116897	AV	LEUKEMIA, ACUTE MYELOID	86049000	morphology	C0936282
116897	AV	LEUKEMIA, ACUTE MYELOID	367651003	morphology	C1288351
116897	AV	LEUKEMIA, ACUTE MYELOID	127331007	disease	C1290833
116897	AV	LEUKEMIA, ACUTE MYELOID	128932005	morphology	C1292764
116897	AV	LEUKEMIA, ACUTE MYELOID	128931003	morphology	C1292766
116897	AV	LEUKEMIA, ACUTE MYELOID	372087000	disease	C1306459
116897	AV	LEUKEMIA, ACUTE MYELOID	86049000	morphology	C1306459
116897	AV	LEUKEMIA, ACUTE MYELOID	24072005	morphology	C1378511
116897	AV	LEUKEMIA, ACUTE MYELOID	24072005	morphology	C1378512
116897	AV	LEUKEMIA, ACUTE MYELOID	414823004	disease	C1532167
116897	AV	LEUKEMIA, ACUTE MYELOID	414825006	disease	C1532168
116899	AV	CIP1/WAF1 TUMOR-ASSOCIATED POLYMORPHISM 1	86251006	morphology	C0027651
116899	AV	CIP1/WAF1 TUMOR-ASSOCIATED POLYMORPHISM 1	86251006	morphology	C0677041
117100	P	Generalized tonicclonic seizures, secondary	363346000	disease	C0006826
117100	P	Generalized tonicclonic seizures, secondary	14799000	morphology	C0013930
117100	P	Generalized tonicclonic seizures, secondary	128462008	disease	C0027627
117100	P	Generalized tonicclonic seizures, secondary	14799000	morphology	C0027627
117100	P	Generalized tonicclonic seizures, secondary	367651003	morphology	C1288351
117550	P	Wilms tumor	128050000	disease	C0000735
117550	P	Wilms tumor	363346000	disease	C0006826
117550	P	Wilms tumor	126880001	disease	C0022665
117550	P	Wilms tumor	86251006	morphology	C0027651
117550	P	Wilms tumor	25081006	morphology	C0027708
117550	P	Wilms tumor	302849000	disease	C0027708
117550	P	Wilms tumor	126644004	disease	C0030793
117550	P	Wilms tumor	126872008	disease	C0035358
117550	P	Wilms tumor	126879004	disease	C0042076
117550	P	Wilms tumor	363420003	disease	C0153465
117550	P	Wilms tumor	188366002	disease	C0153662
117550	P	Wilms tumor	363484005	disease	C0153663
117550	P	Wilms tumor	93953009	disease	C0153663
117550	P	Wilms tumor	271468000	disease	C0178251
117550	P	Wilms tumor	188250002	disease	C0346248
117550	P	Wilms tumor	94111002	disease	C0346955
117550	P	Wilms tumor	115229003	morphology	C0476141
117550	P	Wilms tumor	86251006	morphology	C0677041
117550	P	Wilms tumor	93839008	disease	C0684842
117550	P	Wilms tumor	363518003	disease	C0740457
117550	P	Wilms tumor	93849006	disease	C0740457
117550	P	Wilms tumor	94125001	disease	C0751571
117550	P	Wilms tumor	86049000	morphology	C0936282
117550	P	Wilms tumor	367651003	morphology	C1288351
117550	P	Wilms tumor	126637008	disease	C1290306
117550	P	Wilms tumor	126643005	disease	C1290312
117550	P	Wilms tumor	127331007	disease	C1290833
117550	P	Wilms tumor	94111002	disease	C1304852
117550	P	Wilms tumor	93849006	disease	C1306058
117550	P	Wilms tumor	93953009	disease	C1306155
117550	P	Wilms tumor	372087000	disease	C1306459
117550	P	Wilms tumor	86049000	morphology	C1306459
117550	P	Wilms tumor	94125001	disease	C1306549
117600	P	Cerebral fibrosarcoma	53654007	morphology	C0016057
117600	T	CEREBRAL SARCOMA	115224008	morphology	C0334449
117600	T	CEREBRAL SARCOMA	86049000	morphology	C0936282
117600	P	Cerebral fibrosarcoma	115225009	morphology	C1261359
117600	T	CEREBRAL SARCOMA	2424003	morphology	C1261473
117600	T	CEREBRAL SARCOMA	367651003	morphology	C1288351
117600	T	CEREBRAL SARCOMA	372151005	morphology	C1299262
117600	P	Cerebral fibrosarcoma	400163001	morphology	C1302856
117600	T	CEREBRAL SARCOMA	86049000	morphology	C1306459
117650	P	Mental retardation likely secondary to neonatal hypoxia	363346000	disease	C0006826
117650	P	Mental retardation likely secondary to neonatal hypoxia	14799000	morphology	C0013930
117650	P	Mental retardation likely secondary to neonatal hypoxia	128462008	disease	C0027627
117650	P	Mental retardation likely secondary to neonatal hypoxia	14799000	morphology	C0027627
117650	P	Mental retardation likely secondary to neonatal hypoxia	367651003	morphology	C1288351
117800	P	Positive correlation between wet ear wax and breast cancer	254837009	disease	C0006142
117800	P	Positive correlation between wet ear wax and breast cancer	363346000	disease	C0006826
117800	P	Positive correlation between wet ear wax and breast cancer	255058005	disease	C0039981
117800	P	Positive correlation between wet ear wax and breast cancer	188361007	disease	C0153661
117800	P	Positive correlation between wet ear wax and breast cancer	86049000	morphology	C0936282
117800	P	Positive correlation between wet ear wax and breast cancer	367651003	morphology	C1288351
117800	P	Positive correlation between wet ear wax and breast cancer	126637008	disease	C1290306
117800	P	Positive correlation between wet ear wax and breast cancer	127331007	disease	C1290833
117800	P	Positive correlation between wet ear wax and breast cancer	86049000	morphology	C1306459
117800	P	Positive correlation between wet ear wax and breast cancer	126926005	disease	C1458155
118330	P	Increased lower lip squamous cell carcinoma	363346000	disease	C0006826
118330	P	Increased lower lip squamous cell carcinoma	68453008	morphology	C0007097
118330	P	Increased lower lip squamous cell carcinoma	28899001	morphology	C0007137
118330	P	Increased lower lip squamous cell carcinoma	402815007	disease	C0007137
118330	P	Increased lower lip squamous cell carcinoma	128348002	disease	C0012243
118330	P	Increased lower lip squamous cell carcinoma	128415001	disease	C0012243
118330	P	Increased lower lip squamous cell carcinoma	126632002	disease	C0015461
118330	P	Increased lower lip squamous cell carcinoma	255055008	disease	C0018671
118330	P	Increased lower lip squamous cell carcinoma	126631009	disease	C0018675
118330	P	Increased lower lip squamous cell carcinoma	126770008	disease	C0023761
118330	P	Increased lower lip squamous cell carcinoma	126797001	disease	C0026640
118330	P	Increased lower lip squamous cell carcinoma	235075007	disease	C0026640
118330	P	Increased lower lip squamous cell carcinoma	387837005	disease	C0037579
118330	P	Increased lower lip squamous cell carcinoma	269515006	disease	C0149637
118330	P	Increased lower lip squamous cell carcinoma	363348004	disease	C0153340
118330	P	Increased lower lip squamous cell carcinoma	363505006	disease	C0153381
118330	P	Increased lower lip squamous cell carcinoma	118285006	morphology	C0205853
118330	P	Increased lower lip squamous cell carcinoma	118286007	morphology	C0206720
118330	P	Increased lower lip squamous cell carcinoma	255056009	disease	C0278996
118330	P	Increased lower lip squamous cell carcinoma	255071008	disease	C0280302
118330	P	Increased lower lip squamous cell carcinoma	254833008	disease	C0346122
118330	P	Increased lower lip squamous cell carcinoma	126601003	disease	C0346123
118330	P	Increased lower lip squamous cell carcinoma	363439008	disease	C0346124
118330	P	Increased lower lip squamous cell carcinoma	94054005	disease	C0346124
118330	P	Increased lower lip squamous cell carcinoma	302816009	disease	C0346825
118330	P	Increased lower lip squamous cell carcinoma	252988009	morphology	C0474799
118330	P	Increased lower lip squamous cell carcinoma	307502000	disease	C0585362
118330	P	Increased lower lip squamous cell carcinoma	363501002	disease	C0684808
118330	P	Increased lower lip squamous cell carcinoma	93792007	disease	C0684808
118330	P	Increased lower lip squamous cell carcinoma	93824007	disease	C0751177
118330	P	Increased lower lip squamous cell carcinoma	86049000	morphology	C0936282
118330	P	Increased lower lip squamous cell carcinoma	269469005	disease	C1261473
118330	P	Increased lower lip squamous cell carcinoma	367651003	morphology	C1288351
118330	P	Increased lower lip squamous cell carcinoma	127331007	disease	C1290833
118330	P	Increased lower lip squamous cell carcinoma	371996000	disease	C1299292
118330	P	Increased lower lip squamous cell carcinoma	372001002	disease	C1299295
118330	P	Increased lower lip squamous cell carcinoma	372010005	disease	C1299302
118330	P	Increased lower lip squamous cell carcinoma	399879007	morphology	C1302694
118330	P	Increased lower lip squamous cell carcinoma	400155002	morphology	C1302853
118330	P	Increased lower lip squamous cell carcinoma	93792007	disease	C1304845
118330	P	Increased lower lip squamous cell carcinoma	94054005	disease	C1305974
118330	P	Increased lower lip squamous cell carcinoma	372087000	disease	C1306459
118330	P	Increased lower lip squamous cell carcinoma	86049000	morphology	C1306459
118330	P	Increased lower lip squamous cell carcinoma	93824007	disease	C1306467
118350	T	CHEMODECTOMA, INTRAABDOMINAL, WITH CUTANEOUS ANGIOLIPOMAS	93163002	disease	C0023798
118350	T	CHEMODECTOMA, INTRAABDOMINAL, WITH CUTANEOUS ANGIOLIPOMAS	86251006	morphology	C0027651
118350	T	CHEMODECTOMA, INTRAABDOMINAL, WITH CUTANEOUS ANGIOLIPOMAS	302834008	disease	C0030422
118350	T	CHEMODECTOMA, INTRAABDOMINAL, WITH CUTANEOUS ANGIOLIPOMAS	51747000	morphology	C0030422
118350	T	CHEMODECTOMA, INTRAABDOMINAL, WITH CUTANEOUS ANGIOLIPOMAS	387837005	disease	C0037579
118350	T	CHEMODECTOMA, INTRAABDOMINAL, WITH CUTANEOUS ANGIOLIPOMAS	20376005	disease	C0086692
118350	T	CHEMODECTOMA, INTRAABDOMINAL, WITH CUTANEOUS ANGIOLIPOMAS	3898006	morphology	C0086692
118350	T	CHEMODECTOMA, INTRAABDOMINAL, WITH CUTANEOUS ANGIOLIPOMAS	118616009	disease	C0154129
118350	T	CHEMODECTOMA, INTRAABDOMINAL, WITH CUTANEOUS ANGIOLIPOMAS	115227001	morphology	C0206631
118350	T	CHEMODECTOMA, INTRAABDOMINAL, WITH CUTANEOUS ANGIOLIPOMAS	254827004	disease	C0206631
118350	T	CHEMODECTOMA, INTRAABDOMINAL, WITH CUTANEOUS ANGIOLIPOMAS	404057003	disease	C0206632
118350	T	CHEMODECTOMA, INTRAABDOMINAL, WITH CUTANEOUS ANGIOLIPOMAS	73219006	morphology	C0206632
118350	T	CHEMODECTOMA, INTRAABDOMINAL, WITH CUTANEOUS ANGIOLIPOMAS	128928004	morphology	C0206754
118350	T	CHEMODECTOMA, INTRAABDOMINAL, WITH CUTANEOUS ANGIOLIPOMAS	255046005	disease	C0206754
118350	T	CHEMODECTOMA, INTRAABDOMINAL, WITH CUTANEOUS ANGIOLIPOMAS	92069005	disease	C0334450
118350	T	CHEMODECTOMA, INTRAABDOMINAL, WITH CUTANEOUS ANGIOLIPOMAS	254830006	disease	C0346118
118350	T	CHEMODECTOMA, INTRAABDOMINAL, WITH CUTANEOUS ANGIOLIPOMAS	134328007	morphology	C0431102
118350	T	CHEMODECTOMA, INTRAABDOMINAL, WITH CUTANEOUS ANGIOLIPOMAS	115222007	morphology	C0476130
118350	T	CHEMODECTOMA, INTRAABDOMINAL, WITH CUTANEOUS ANGIOLIPOMAS	86251006	morphology	C0677041
118350	T	CHEMODECTOMA, INTRAABDOMINAL, WITH CUTANEOUS ANGIOLIPOMAS	253045006	morphology	C0878523
118350	T	CHEMODECTOMA, INTRAABDOMINAL, WITH CUTANEOUS ANGIOLIPOMAS	127331007	disease	C1290833
118350	T	CHEMODECTOMA, INTRAABDOMINAL, WITH CUTANEOUS ANGIOLIPOMAS	51747000	morphology	C1306262
118450	P	Hepatocellular carcinoma	128050000	disease	C0000735
118450	P	Papillary thyroid carcinoma	4797003	morphology	C0001420
118450	P	Hepatocellular carcinoma	363346000	disease	C0006826
118450	P	Hepatocellular carcinoma	68453008	morphology	C0007097
118450	P	Papillary thyroid carcinoma	363478007	disease	C0007115
118450	P	Papillary thyroid carcinoma	94098005	disease	C0007115
118450	P	Papillary thyroid carcinoma	25910003	morphology	C0007133
118450	P	Hepatocellular carcinoma	128348002	disease	C0012243
118450	P	Papillary thyroid carcinoma	387922007	disease	C0014132
118450	P	Papillary thyroid carcinoma	387927001	disease	C0014132
118450	P	Papillary thyroid carcinoma	255055008	disease	C0018671
118450	P	Hepatocellular carcinoma	109841003	disease	C0019204
118450	P	Hepatocellular carcinoma	126851005	disease	C0019204
118450	P	Hepatocellular carcinoma	25370001	morphology	C0019204
118450	P	Hepatocellular carcinoma	126851005	disease	C0023903
118450	P	Hepatocellular carcinoma	93870000	disease	C0024620
118450	P	Hepatocellular carcinoma	95214007	disease	C0024620
118450	P	Papillary thyroid carcinoma	126635000	disease	C0027533
118450	P	Papillary thyroid carcinoma	127018007	disease	C0040136
118450	P	Papillary thyroid carcinoma	371982006	disease	C0153658
118450	P	Hepatocellular carcinoma	188366002	disease	C0153662
118450	P	Hepatocellular carcinoma	118285006	morphology	C0205853
118450	P	Papillary thyroid carcinoma	118286007	morphology	C0206720
118450	P	Papillary thyroid carcinoma	255029007	disease	C0238463
118450	P	Papillary thyroid carcinoma	4797003	morphology	C0238463
118450	P	Papillary thyroid carcinoma	255056009	disease	C0278996
118450	P	Hepatocellular carcinoma	115215004	morphology	C0334275
118450	P	Hepatocellular carcinoma	254532005	disease	C0345760
118450	P	Hepatocellular carcinoma	93870000	disease	C0345904
118450	P	Hepatocellular carcinoma	255077007	disease	C0346617
118450	P	Hepatocellular carcinoma	94111002	disease	C0346955
118450	P	Papillary thyroid carcinoma	252988009	morphology	C0474799
118450	P	Hepatocellular carcinoma	253016009	morphology	C0474812
118450	P	Hepatocellular carcinoma	93839008	disease	C0684842
118450	P	Papillary thyroid carcinoma	363489000	disease	C0746787
118450	P	Papillary thyroid carcinoma	93922007	disease	C0746787
118450	P	Hepatocellular carcinoma	86049000	morphology	C0936282
118450	P	Hepatocellular carcinoma	408646000	disease	C0948680
118450	P	Hepatocellular carcinoma	367651003	morphology	C1288351
118450	P	Hepatocellular carcinoma	126637008	disease	C1290306
118450	P	Hepatocellular carcinoma	126643005	disease	C1290312
118450	P	Hepatocellular carcinoma	127331007	disease	C1290833
118450	P	Papillary thyroid carcinoma	371983001	disease	C1299280
118450	P	Hepatocellular carcinoma	399879007	morphology	C1302694
118450	P	Hepatocellular carcinoma	399961007	morphology	C1302750
118450	P	Papillary thyroid carcinoma	400155002	morphology	C1302853
118450	P	Papillary thyroid carcinoma	93922007	disease	C1304846
118450	P	Hepatocellular carcinoma	94111002	disease	C1304852
118450	P	Papillary thyroid carcinoma	94098005	disease	C1306310
118450	P	Hepatocellular carcinoma	372087000	disease	C1306459
118450	P	Hepatocellular carcinoma	86049000	morphology	C1306459
118450	P	Papillary thyroid carcinoma	4797003	morphology	C1306837
118865	T	CHOROIDAL OSTEOMA, BILATERAL	126537000	disease	C0005967
118865	T	CHOROIDAL OSTEOMA, BILATERAL	302858007	disease	C0029440
118865	T	CHOROIDAL OSTEOMA, BILATERAL	83612000	morphology	C0029440
118865	T	CHOROIDAL OSTEOMA, BILATERAL	20376005	disease	C0086692
118865	T	CHOROIDAL OSTEOMA, BILATERAL	3898006	morphology	C0086692
118865	T	CHOROIDAL OSTEOMA, BILATERAL	92027006	disease	C0153959
118865	T	CHOROIDAL OSTEOMA, BILATERAL	92027006	disease	C0684516
118865	T	CHOROIDAL OSTEOMA, BILATERAL	115237006	morphology	C1266164
118865	T	CHOROIDAL OSTEOMA, BILATERAL	363229000	disease	C1285375
118865	T	CHOROIDAL OSTEOMA, BILATERAL	127331007	disease	C1290833
120435	A	COLON CANCER, FAMILIAL NONPOLYPOSIS, TYPE 1	128050000	disease	C0000735
120435	A	COLON CANCER, FAMILIAL NONPOLYPOSIS, TYPE 1	363346000	disease	C0006826
120435	A	COLON CANCER, FAMILIAL NONPOLYPOSIS, TYPE 1	363406005	disease	C0007102
120435	A	COLON CANCER, FAMILIAL NONPOLYPOSIS, TYPE 1	126838000	disease	C0009375
120435	A	COLON CANCER, FAMILIAL NONPOLYPOSIS, TYPE 1	126837005	disease	C0009404
120435	A	COLON CANCER, FAMILIAL NONPOLYPOSIS, TYPE 1	128348002	disease	C0012243
120435	A	COLON CANCER, FAMILIAL NONPOLYPOSIS, TYPE 1	128415001	disease	C0012243
120435	A	COLON CANCER, FAMILIAL NONPOLYPOSIS, TYPE 1	126768004	disease	C0017185
120435	A	COLON CANCER, FAMILIAL NONPOLYPOSIS, TYPE 1	126769007	disease	C0021841
120435	A	COLON CANCER, FAMILIAL NONPOLYPOSIS, TYPE 1	188366002	disease	C0153662
120435	A	COLON CANCER, FAMILIAL NONPOLYPOSIS, TYPE 1	254532005	disease	C0345760
120435	A	COLON CANCER, FAMILIAL NONPOLYPOSIS, TYPE 1	255077007	disease	C0346617
120435	A	COLON CANCER, FAMILIAL NONPOLYPOSIS, TYPE 1	363508008	disease	C0346627
120435	A	COLON CANCER, FAMILIAL NONPOLYPOSIS, TYPE 1	363510005	disease	C0346629
120435	T	COLORECTAL CANCER, HEREDITARY NONPOLYPOSIS, TYPE 1	86049000	morphology	C0936282
120435	T	COLORECTAL CANCER, HEREDITARY NONPOLYPOSIS, TYPE 1	367651003	morphology	C1288351
120435	A	COLON CANCER, FAMILIAL NONPOLYPOSIS, TYPE 1	126637008	disease	C1290306
120435	A	COLON CANCER, FAMILIAL NONPOLYPOSIS, TYPE 1	126643005	disease	C1290312
120435	A	COLON CANCER, FAMILIAL NONPOLYPOSIS, TYPE 1	127331007	disease	C1290833
120435	T	COLORECTAL CANCER, HEREDITARY NONPOLYPOSIS, TYPE 1	86049000	morphology	C1306459
120436	P	Nonpolyposis colon cancer	128050000	disease	C0000735
120436	P	Nonpolyposis colon cancer	363346000	disease	C0006826
120436	P	Nonpolyposis colon cancer	363406005	disease	C0007102
120436	P	Nonpolyposis colon cancer	126838000	disease	C0009375
120436	P	Nonpolyposis colon cancer	126837005	disease	C0009404
120436	P	Nonpolyposis colon cancer	128348002	disease	C0012243
120436	P	Nonpolyposis colon cancer	128415001	disease	C0012243
120436	P	Nonpolyposis colon cancer	126768004	disease	C0017185
120436	AV	TURCOT SYNDROME WITH GLIOBLASTOMA	63634009	morphology	C0017636
120436	AV	TURCOT SYNDROME WITH GLIOBLASTOMA	115240006	morphology	C0017638
120436	VA	NEUROFIBROMATOSIS, TYPE I, WITH GLIOMA, INCLUDED	74532006	morphology	C0017638
120436	P	Nonpolyposis colon cancer	126769007	disease	C0021841
120436	VA	NEUROFIBROMATOSIS, TYPE I, WITH LEUKEMIA, INCLUDED	87163000	morphology	C0023418
120436	VA	NEUROFIBROMATOSIS, TYPE I, WITH LEUKEMIA, INCLUDED	93143009	disease	C0023418
120436	VA	NEUROFIBROMATOSIS, TYPE I, INCLUDED	86251006	morphology	C0027651
120436	VA	NEUROFIBROMATOSIS, TYPE I, INCLUDED	115242003	morphology	C0027830
120436	VA	NEUROFIBROMATOSIS, TYPE I, INCLUDED	81669005	morphology	C0027831
120436	AV	TURCOT SYNDROME WITH GLIOBLASTOMA	72900001	disease	C0032580
120436	AV	MUIR-TORRE SYNDROME	126491004	disease	C0036503
120436	AV	MUIR-TORRE SYNDROME	126488004	disease	C0037286
120436	AV	MUIR-TORRE SYNDROME	387837005	disease	C0037579
120436	P	Nonpolyposis colon cancer	188366002	disease	C0153662
120436	VA	NEUROFIBROMATOSIS, TYPE I, INCLUDED	81669005	morphology	C0162678
120436	VA	NEUROFIBROMATOSIS, TYPE I, INCLUDED	115242003	morphology	C0206727
120436	AV	TURCOT SYNDROME WITH GLIOBLASTOMA	61665008	disease	C0265325
120436	AV	TURCOT SYNDROME WITH GLIOBLASTOMA	55352002	disease	C0277576
120436	P	Nonpolyposis colon cancer	254532005	disease	C0345760
120436	AV	MUIR-TORRE SYNDROME	126489007	disease	C0345988
120436	P	Nonpolyposis colon cancer	255077007	disease	C0346617
120436	P	Nonpolyposis colon cancer	363508008	disease	C0346627
120436	P	Nonpolyposis colon cancer	363510005	disease	C0346629
120436	VA	NEUROFIBROMATOSIS, TYPE I, WITH LEUKEMIA, INCLUDED	269475001	disease	C0348393
120436	VA	NEUROFIBROMATOSIS, TYPE I, WITH LEUKEMIA, INCLUDED	414388001	morphology	C0376544
120436	VA	NEUROFIBROMATOSIS, TYPE I, WITH LEUKEMIA, INCLUDED	414644002	morphology	C0376544
120436	VA	NEUROFIBROMATOSIS, TYPE I, WITH LEUKEMIA, INCLUDED	129154003	disease	C0376545
120436	VA	NEUROFIBROMATOSIS, TYPE I, WITH LEUKEMIA, INCLUDED	269475001	disease	C0376545
120436	AV	TURCOT SYNDROME WITH GLIOBLASTOMA	239003009	disease	C0473571
120436	AV	TURCOT SYNDROME WITH GLIOBLASTOMA	253061008	morphology	C0474842
120436	AV	TURCOT SYNDROME WITH GLIOBLASTOMA	253062001	morphology	C0474843
120436	AV	TURCOT SYNDROME WITH GLIOBLASTOMA	416500007	morphology	C0555198
120436	VA	NEUROFIBROMATOSIS, TYPE I, WITH GLIOMA, INCLUDED	74532006	morphology	C0555198
120436	VA	NEUROFIBROMATOSIS, TYPE I, INCLUDED	86251006	morphology	C0677041
120436	VA	NEUROFIBROMATOSIS, TYPE I, WITH LEUKEMIA, INCLUDED	93720005	disease	C0686582
120436	AV	TURCOT SYNDROME WITH GLIOBLASTOMA	86049000	morphology	C0936282
120436	AV	MUIR-TORRE SYNDROME	115216003	morphology	C1266061
120436	P	Nonpolyposis colon cancer	367651003	morphology	C1288351
120436	P	Nonpolyposis colon cancer	126637008	disease	C1290306
120436	P	Nonpolyposis colon cancer	126643005	disease	C1290312
120436	P	Nonpolyposis colon cancer	127331007	disease	C1290833
120436	VA	NEUROFIBROMATOSIS, TYPE I, WITH LEUKEMIA, INCLUDED	128931003	morphology	C1292766
120436	AV	MUIR-TORRE SYNDROME	399883007	morphology	C1302696
120436	AV	MUIR-TORRE SYNDROME	400186008	disease	C1302872
120436	VA	NEUROFIBROMATOSIS, TYPE I, WITH LEUKEMIA, INCLUDED	372087000	disease	C1306459
120436	AV	TURCOT SYNDROME WITH GLIOBLASTOMA	86049000	morphology	C1306459
120436	VA	NEUROFIBROMATOSIS, TYPE I, INCLUDED	81669005	morphology	C1314735
120436	AV	MUIR-TORRE SYNDROME	403824007	disease	C1321489
120436	VA	NEUROFIBROMATOSIS, TYPE I, WITH LEUKEMIA, INCLUDED	414823004	disease	C1532167
120436	VA	NEUROFIBROMATOSIS, TYPE I, WITH LEUKEMIA, INCLUDED	414825006	disease	C1532168
120436	AV	TURCOT SYNDROME WITH GLIOBLASTOMA	63634009	morphology	C1621958
120470	AV	COLORECTAL CANCER	363346000	disease	C0006826
120470	T	DELETED IN COLORECTAL CARCINOMA	68453008	morphology	C0007097
120470	T	DELETED IN COLORECTAL CARCINOMA	118285006	morphology	C0205853
120470	T	DELETED IN COLORECTAL CARCINOMA	86049000	morphology	C0936282
120470	T	DELETED IN COLORECTAL CARCINOMA	367651003	morphology	C1288351
120470	T	DELETED IN COLORECTAL CARCINOMA	399879007	morphology	C1302694
120470	T	DELETED IN COLORECTAL CARCINOMA	86049000	morphology	C1306459
120520	A	COMMON ACUTE LYMPHOCYTIC LEUKEMIA ANTIGEN	363346000	disease	C0006826
120520	A	COMMON ACUTE LYMPHOCYTIC LEUKEMIA ANTIGEN	87163000	morphology	C0023418
120520	A	COMMON ACUTE LYMPHOCYTIC LEUKEMIA ANTIGEN	93143009	disease	C0023418
120520	A	COMMON ACUTE LYMPHOCYTIC LEUKEMIA ANTIGEN	128822004	morphology	C0023448
120520	A	COMMON ACUTE LYMPHOCYTIC LEUKEMIA ANTIGEN	32280000	morphology	C0023448
120520	A	COMMON ACUTE LYMPHOCYTIC LEUKEMIA ANTIGEN	128822004	morphology	C0023449
120520	A	COMMON ACUTE LYMPHOCYTIC LEUKEMIA ANTIGEN	128822004	morphology	C0023453
120520	A	COMMON ACUTE LYMPHOCYTIC LEUKEMIA ANTIGEN	24072005	morphology	C0085669
120520	A	COMMON ACUTE LYMPHOCYTIC LEUKEMIA ANTIGEN	91855006	disease	C0085669
120520	A	COMMON ACUTE LYMPHOCYTIC LEUKEMIA ANTIGEN	269475001	disease	C0348393
120520	A	COMMON ACUTE LYMPHOCYTIC LEUKEMIA ANTIGEN	414388001	morphology	C0376544
120520	A	COMMON ACUTE LYMPHOCYTIC LEUKEMIA ANTIGEN	414644002	morphology	C0376544
120520	A	COMMON ACUTE LYMPHOCYTIC LEUKEMIA ANTIGEN	129154003	disease	C0376545
120520	A	COMMON ACUTE LYMPHOCYTIC LEUKEMIA ANTIGEN	269475001	disease	C0376545
120520	A	COMMON ACUTE LYMPHOCYTIC LEUKEMIA ANTIGEN	414628006	morphology	C0598798
120520	A	COMMON ACUTE LYMPHOCYTIC LEUKEMIA ANTIGEN	93720005	disease	C0686582
120520	A	COMMON ACUTE LYMPHOCYTIC LEUKEMIA ANTIGEN	91855006	disease	C0686587
120520	A	COMMON ACUTE LYMPHOCYTIC LEUKEMIA ANTIGEN	86049000	morphology	C0936282
120520	A	COMMON ACUTE LYMPHOCYTIC LEUKEMIA ANTIGEN	367651003	morphology	C1288351
120520	A	COMMON ACUTE LYMPHOCYTIC LEUKEMIA ANTIGEN	127331007	disease	C1290833
120520	A	COMMON ACUTE LYMPHOCYTIC LEUKEMIA ANTIGEN	128932005	morphology	C1292764
120520	A	COMMON ACUTE LYMPHOCYTIC LEUKEMIA ANTIGEN	128935007	morphology	C1292765
120520	A	COMMON ACUTE LYMPHOCYTIC LEUKEMIA ANTIGEN	128931003	morphology	C1292766
120520	A	COMMON ACUTE LYMPHOCYTIC LEUKEMIA ANTIGEN	372087000	disease	C1306459
120520	A	COMMON ACUTE LYMPHOCYTIC LEUKEMIA ANTIGEN	86049000	morphology	C1306459
120520	A	COMMON ACUTE LYMPHOCYTIC LEUKEMIA ANTIGEN	24072005	morphology	C1378511
120520	A	COMMON ACUTE LYMPHOCYTIC LEUKEMIA ANTIGEN	24072005	morphology	C1378512
120520	A	COMMON ACUTE LYMPHOCYTIC LEUKEMIA ANTIGEN	413440007	morphology	C1531702
120520	A	COMMON ACUTE LYMPHOCYTIC LEUKEMIA ANTIGEN	414823004	disease	C1532167
120520	A	COMMON ACUTE LYMPHOCYTIC LEUKEMIA ANTIGEN	414825006	disease	C1532168
121360	AV	MYELOID LEUKEMIA, ACUTE, M4Eo SUBTYPE	363346000	disease	C0006826
121360	AV	MYELOID LEUKEMIA, ACUTE, M4Eo SUBTYPE	87163000	morphology	C0023418
121360	AV	MYELOID LEUKEMIA, ACUTE, M4Eo SUBTYPE	93143009	disease	C0023418
121360	AV	MYELOID LEUKEMIA, ACUTE, M4Eo SUBTYPE	17788007	morphology	C0023467
121360	AV	MYELOID LEUKEMIA, ACUTE, M4Eo SUBTYPE	413443009	morphology	C0023467
121360	AV	MYELOID LEUKEMIA, ACUTE, M4Eo SUBTYPE	91861009	disease	C0023467
121360	AV	MYELOID LEUKEMIA, ACUTE, M4Eo SUBTYPE	128934006	morphology	C0023470
121360	AV	MYELOID LEUKEMIA, ACUTE, M4Eo SUBTYPE	188732008	disease	C0023470
121360	AV	MYELOID LEUKEMIA, ACUTE, M4Eo SUBTYPE	37810007	morphology	C0023470
121360	AV	MYELOID LEUKEMIA, ACUTE, M4Eo SUBTYPE	37810007	morphology	C0027019
121360	AV	MYELOID LEUKEMIA, ACUTE, M4Eo SUBTYPE	414792005	morphology	C0027022
121360	AV	MYELOID LEUKEMIA, ACUTE, M4Eo SUBTYPE	24072005	morphology	C0085669
121360	AV	MYELOID LEUKEMIA, ACUTE, M4Eo SUBTYPE	91855006	disease	C0085669
121360	AV	MYELOID LEUKEMIA, ACUTE, M4Eo SUBTYPE	91861009	disease	C0153885
121360	AV	MYELOID LEUKEMIA, ACUTE, M4Eo SUBTYPE	37810007	morphology	C0206142
121360	AV	MYELOID LEUKEMIA, ACUTE, M4Eo SUBTYPE	269475001	disease	C0348393
121360	AV	MYELOID LEUKEMIA, ACUTE, M4Eo SUBTYPE	37810007	morphology	C0349640
121360	AV	MYELOID LEUKEMIA, ACUTE, M4Eo SUBTYPE	414388001	morphology	C0376544
121360	AV	MYELOID LEUKEMIA, ACUTE, M4Eo SUBTYPE	414644002	morphology	C0376544
121360	AV	MYELOID LEUKEMIA, ACUTE, M4Eo SUBTYPE	129154003	disease	C0376545
121360	AV	MYELOID LEUKEMIA, ACUTE, M4Eo SUBTYPE	269475001	disease	C0376545
121360	AV	MYELOID LEUKEMIA, ACUTE, M4Eo SUBTYPE	37810007	morphology	C0598894
121360	AV	MYELOID LEUKEMIA, ACUTE, M4Eo SUBTYPE	93720005	disease	C0686582
121360	AV	MYELOID LEUKEMIA, ACUTE, M4Eo SUBTYPE	91855006	disease	C0686587
121360	AV	MYELOID LEUKEMIA, ACUTE, M4Eo SUBTYPE	86049000	morphology	C0936282
121360	AV	MYELOID LEUKEMIA, ACUTE, M4Eo SUBTYPE	367651003	morphology	C1288351
121360	AV	MYELOID LEUKEMIA, ACUTE, M4Eo SUBTYPE	127331007	disease	C1290833
121360	AV	MYELOID LEUKEMIA, ACUTE, M4Eo SUBTYPE	128932005	morphology	C1292764
121360	AV	MYELOID LEUKEMIA, ACUTE, M4Eo SUBTYPE	128931003	morphology	C1292766
121360	AV	MYELOID LEUKEMIA, ACUTE, M4Eo SUBTYPE	372087000	disease	C1306459
121360	AV	MYELOID LEUKEMIA, ACUTE, M4Eo SUBTYPE	86049000	morphology	C1306459
121360	AV	MYELOID LEUKEMIA, ACUTE, M4Eo SUBTYPE	24072005	morphology	C1378511
121360	AV	MYELOID LEUKEMIA, ACUTE, M4Eo SUBTYPE	24072005	morphology	C1378512
121360	AV	MYELOID LEUKEMIA, ACUTE, M4Eo SUBTYPE	414823004	disease	C1532167
121360	AV	MYELOID LEUKEMIA, ACUTE, M4Eo SUBTYPE	414825006	disease	C1532168
122560	P	Secondary growth hormone deficiency	363346000	disease	C0006826
122560	P	Secondary growth hormone deficiency	14799000	morphology	C0013930
122560	P	Secondary growth hormone deficiency	128462008	disease	C0027627
122560	P	Secondary growth hormone deficiency	14799000	morphology	C0027627
122560	P	Secondary growth hormone deficiency	367651003	morphology	C1288351
122720	AV	LUNG CANCER, RESISTANCE TO	363346000	disease	C0006826
122720	AV	LUNG CANCER, RESISTANCE TO	86049000	morphology	C0936282
122720	AV	LUNG CANCER, RESISTANCE TO	367651003	morphology	C1288351
122720	AV	LUNG CANCER, RESISTANCE TO	86049000	morphology	C1306459
123790	P	Cutaneous and mucosal skin tags	92384009	disease	C0004998
123790	P	Cutaneous and mucosal skin tags	126488004	disease	C0037286
123790	P	Cutaneous and mucosal skin tags	201091002	disease	C0037293
123790	P	Cutaneous and mucosal skin tags	31069005	morphology	C0037293
123790	P	Cutaneous and mucosal skin tags	387837005	disease	C0037579
123790	P	Cutaneous and mucosal skin tags	20376005	disease	C0086692
123790	P	Cutaneous and mucosal skin tags	3898006	morphology	C0086692
123790	P	Cutaneous and mucosal skin tags	118285006	morphology	C0205853
123790	P	Cutaneous and mucosal skin tags	118286007	morphology	C0206720
123790	P	Cutaneous and mucosal skin tags	92069005	disease	C0334450
123790	P	Cutaneous and mucosal skin tags	254649008	disease	C0345976
123790	P	Cutaneous and mucosal skin tags	254658001	disease	C0345981
123790	P	Cutaneous and mucosal skin tags	252994001	morphology	C0474800
123790	P	Cutaneous and mucosal skin tags	402811003	disease	C1274252
123790	P	Cutaneous and mucosal skin tags	127331007	disease	C1290833
123790	P	Cutaneous and mucosal skin tags	400186008	disease	C1302872
123790	P	Cutaneous and mucosal skin tags	400207007	morphology	C1302886
123790	P	Cutaneous and mucosal skin tags	31069005	morphology	C1384410
123829	AV	MELANOMA, CUTANEOUS MALIGNANT, 3	363346000	disease	C0006826
123829	AV	MELANOMA, CUTANEOUS MALIGNANT, 3	372130007	disease	C0007114
123829	AV	MELANOMA, CUTANEOUS MALIGNANT, 3	2092003	morphology	C0025202
123829	AV	MELANOMA, CUTANEOUS MALIGNANT, 3	372244006	disease	C0025202
123829	AV	MELANOMA, CUTANEOUS MALIGNANT, 3	126488004	disease	C0037286
123829	AV	MELANOMA, CUTANEOUS MALIGNANT, 3	387837005	disease	C0037579
123829	AV	MELANOMA, CUTANEOUS MALIGNANT, 3	93655004	disease	C0151779
123829	AV	MELANOMA, CUTANEOUS MALIGNANT, 3	276728004	disease	C0349501
123829	AV	MELANOMA, CUTANEOUS MALIGNANT, 3	372156000	morphology	C0431097
123829	AV	MELANOMA, CUTANEOUS MALIGNANT, 3	115223002	morphology	C0476131
123829	AV	MELANOMA, CUTANEOUS MALIGNANT, 3	86049000	morphology	C0936282
123829	AV	MELANOMA, CUTANEOUS MALIGNANT, 3	269469005	disease	C1261473
123829	AV	MELANOMA, CUTANEOUS MALIGNANT, 3	367651003	morphology	C1288351
123829	AV	MELANOMA, CUTANEOUS MALIGNANT, 3	127331007	disease	C1290833
123829	AV	MELANOMA, CUTANEOUS MALIGNANT, 3	399956005	disease	C1302746
123829	AV	MELANOMA, CUTANEOUS MALIGNANT, 3	400186008	disease	C1302872
123829	AV	MELANOMA, CUTANEOUS MALIGNANT, 3	86049000	morphology	C1306459
123940	AV	WHITE SPONGE NEVUS	21119008	morphology	C0018508
123940	AV	WHITE SPONGE NEVUS	21119008	morphology	C0027960
123940	AV	WHITE SPONGE NEVUS	21119008	morphology	C0027962
123940	AV	WHITE SPONGE NEVUS	3898006	morphology	C0086692
123940	AV	WHITE SPONGE NEVUS	115223002	morphology	C0476131
123940	AV	WHITE SPONGE NEVUS	397195004	morphology	C1301273
123940	AV	WHITE SPONGE NEVUS	400094003	morphology	C1302707
123940	AV	WHITE SPONGE NEVUS	21119008	morphology	C1456781
124030	P	Statistical association of extensive metabolism and bladder carcinoma	128050000	disease	C0000735
124030	P	Statistical association of extensive metabolism and bladder carcinoma	399326009	disease	C0005684
124030	P	Statistical association of extensive metabolism and bladder carcinoma	93689003	disease	C0005684
124030	P	Statistical association of extensive metabolism and bladder carcinoma	126885006	disease	C0005695
124030	P	Statistical association of extensive metabolism and bladder carcinoma	363346000	disease	C0006826
124030	P	Statistical association of extensive metabolism and bladder carcinoma	68453008	morphology	C0007097
124030	P	Statistical association of extensive metabolism and bladder carcinoma	126644004	disease	C0030793
124030	P	Statistical association of extensive metabolism and bladder carcinoma	126879004	disease	C0042076
124030	P	Statistical association of extensive metabolism and bladder carcinoma	254913005	disease	C0042076
124030	P	Statistical association of extensive metabolism and bladder carcinoma	188366002	disease	C0153662
124030	P	Statistical association of extensive metabolism and bladder carcinoma	363484005	disease	C0153663
124030	P	Statistical association of extensive metabolism and bladder carcinoma	93953009	disease	C0153663
124030	P	Statistical association of extensive metabolism and bladder carcinoma	271468000	disease	C0178251
124030	P	Statistical association of extensive metabolism and bladder carcinoma	118285006	morphology	C0205853
124030	P	Statistical association of extensive metabolism and bladder carcinoma	255066001	disease	C0346554
124030	P	Statistical association of extensive metabolism and bladder carcinoma	94111002	disease	C0346955
124030	P	Statistical association of extensive metabolism and bladder carcinoma	255108000	disease	C0699885
124030	P	Statistical association of extensive metabolism and bladder carcinoma	363517008	disease	C0751571
124030	P	Statistical association of extensive metabolism and bladder carcinoma	94125001	disease	C0751571
124030	P	Statistical association of extensive metabolism and bladder carcinoma	86049000	morphology	C0936282
124030	P	Statistical association of extensive metabolism and bladder carcinoma	367651003	morphology	C1288351
124030	P	Statistical association of extensive metabolism and bladder carcinoma	126637008	disease	C1290306
124030	P	Statistical association of extensive metabolism and bladder carcinoma	127331007	disease	C1290833
124030	P	Statistical association of extensive metabolism and bladder carcinoma	399879007	morphology	C1302694
124030	P	Statistical association of extensive metabolism and bladder carcinoma	94111002	disease	C1304852
124030	P	Statistical association of extensive metabolism and bladder carcinoma	93953009	disease	C1306155
124030	P	Statistical association of extensive metabolism and bladder carcinoma	372087000	disease	C1306459
124030	P	Statistical association of extensive metabolism and bladder carcinoma	86049000	morphology	C1306459
124030	P	Statistical association of extensive metabolism and bladder carcinoma	94125001	disease	C1306549
124030	P	Statistical association of extensive metabolism and bladder carcinoma	93689003	disease	C1314699
125400	P	Crescent/chevronshaped pulp chambers (secondary teeth)	363346000	disease	C0006826
125400	P	Crescent/chevronshaped pulp chambers (secondary teeth)	14799000	morphology	C0013930
125400	P	Crescent/chevronshaped pulp chambers (secondary teeth)	128462008	disease	C0027627
125400	P	Crescent/chevronshaped pulp chambers (secondary teeth)	14799000	morphology	C0027627
125400	P	Crescent/chevronshaped pulp chambers (secondary teeth)	367651003	morphology	C1288351
125490	P	Primary and secondary teeth affected	363346000	disease	C0006826
125490	P	Primary and secondary teeth affected	14799000	morphology	C0013930
125490	P	Primary and secondary teeth affected	128462008	disease	C0027627
125490	P	Primary and secondary teeth affected	14799000	morphology	C0027627
125490	P	Primary and secondary teeth affected	367651003	morphology	C1288351
125500	P	Amberopalescent colored teeth (primary and secondary)	363346000	disease	C0006826
125500	P	Amberopalescent colored teeth (primary and secondary)	14799000	morphology	C0013930
125500	P	Amberopalescent colored teeth (primary and secondary)	128462008	disease	C0027627
125500	P	Amberopalescent colored teeth (primary and secondary)	14799000	morphology	C0027627
125500	P	Amberopalescent colored teeth (primary and secondary)	367651003	morphology	C1288351
125600	T	DERMATOSIS PAPULOSA NIGRA	92384009	disease	C0004998
125600	T	DERMATOSIS PAPULOSA NIGRA	254669003	disease	C0011645
125600	T	DERMATOSIS PAPULOSA NIGRA	25499005	morphology	C0011645
125600	T	DERMATOSIS PAPULOSA NIGRA	25499005	morphology	C0022603
125600	P	variant of seborrheic keratoses	398838000	disease	C0022603
125600	T	DERMATOSIS PAPULOSA NIGRA	126488004	disease	C0037286
125600	T	DERMATOSIS PAPULOSA NIGRA	387837005	disease	C0037579
125600	T	DERMATOSIS PAPULOSA NIGRA	20376005	disease	C0086692
125600	T	DERMATOSIS PAPULOSA NIGRA	3898006	morphology	C0086692
125600	T	DERMATOSIS PAPULOSA NIGRA	118285006	morphology	C0205853
125600	T	DERMATOSIS PAPULOSA NIGRA	25499005	morphology	C0302894
125600	T	DERMATOSIS PAPULOSA NIGRA	92069005	disease	C0334450
125600	T	DERMATOSIS PAPULOSA NIGRA	254649008	disease	C0345976
125600	T	DERMATOSIS PAPULOSA NIGRA	254658001	disease	C0345981
125600	T	DERMATOSIS PAPULOSA NIGRA	127331007	disease	C1290833
125600	T	DERMATOSIS PAPULOSA NIGRA	400186008	disease	C1302872
125600	T	DERMATOSIS PAPULOSA NIGRA	400207007	morphology	C1302886
125860	VA	LEUKEMIA, POST-CHEMOTHERAPY, SUSCEPTIBILITY TO	363346000	disease	C0006826
125860	VA	LEUKEMIA, POST-CHEMOTHERAPY, SUSCEPTIBILITY TO	87163000	morphology	C0023418
125860	VA	LEUKEMIA, POST-CHEMOTHERAPY, SUSCEPTIBILITY TO	93143009	disease	C0023418
125860	VA	LEUKEMIA, POST-CHEMOTHERAPY, SUSCEPTIBILITY TO	269475001	disease	C0348393
125860	VA	LEUKEMIA, POST-CHEMOTHERAPY, SUSCEPTIBILITY TO	414388001	morphology	C0376544
125860	VA	LEUKEMIA, POST-CHEMOTHERAPY, SUSCEPTIBILITY TO	414644002	morphology	C0376544
125860	VA	LEUKEMIA, POST-CHEMOTHERAPY, SUSCEPTIBILITY TO	129154003	disease	C0376545
125860	VA	LEUKEMIA, POST-CHEMOTHERAPY, SUSCEPTIBILITY TO	269475001	disease	C0376545
125860	VA	LEUKEMIA, POST-CHEMOTHERAPY, SUSCEPTIBILITY TO	93720005	disease	C0686582
125860	VA	LEUKEMIA, POST-CHEMOTHERAPY, SUSCEPTIBILITY TO	86049000	morphology	C0936282
125860	VA	LEUKEMIA, POST-CHEMOTHERAPY, SUSCEPTIBILITY TO	367651003	morphology	C1288351
125860	VA	LEUKEMIA, POST-CHEMOTHERAPY, SUSCEPTIBILITY TO	127331007	disease	C1290833
125860	VA	LEUKEMIA, POST-CHEMOTHERAPY, SUSCEPTIBILITY TO	128931003	morphology	C1292766
125860	VA	LEUKEMIA, POST-CHEMOTHERAPY, SUSCEPTIBILITY TO	372087000	disease	C1306459
125860	VA	LEUKEMIA, POST-CHEMOTHERAPY, SUSCEPTIBILITY TO	86049000	morphology	C1306459
125860	VA	LEUKEMIA, POST-CHEMOTHERAPY, SUSCEPTIBILITY TO	414823004	disease	C1532167
125860	VA	LEUKEMIA, POST-CHEMOTHERAPY, SUSCEPTIBILITY TO	414825006	disease	C1532168
126337	A	GADD153 MYXOID LIPOSARCOMA, INCLUDED	363346000	disease	C0006826
126337	A	GADD153 MYXOID LIPOSARCOMA, INCLUDED	372130007	disease	C0007114
126337	A	GADD153 MYXOID LIPOSARCOMA, INCLUDED	254829001	disease	C0023827
126337	A	GADD153 MYXOID LIPOSARCOMA, INCLUDED	49430005	morphology	C0023827
126337	A	GADD153 MYXOID LIPOSARCOMA, INCLUDED	126488004	disease	C0037286
126337	A	GADD153 MYXOID LIPOSARCOMA, INCLUDED	387837005	disease	C0037579
126337	A	GADD153 MYXOID LIPOSARCOMA, INCLUDED	115227001	morphology	C0206631
126337	A	GADD153 MYXOID LIPOSARCOMA, INCLUDED	254827004	disease	C0206631
126337	A	GADD153 MYXOID LIPOSARCOMA, INCLUDED	27849002	morphology	C0206634
126337	A	GADD153 MYXOID LIPOSARCOMA, INCLUDED	404069006	disease	C0206634
126337	A	GADD153 MYXOID LIPOSARCOMA, INCLUDED	115224008	morphology	C0334449
126337	A	GADD153 MYXOID LIPOSARCOMA, INCLUDED	254828009	disease	C0346117
126337	A	GADD153 MYXOID LIPOSARCOMA, INCLUDED	253044005	morphology	C0474827
126337	A	GADD153 MYXOID LIPOSARCOMA, INCLUDED	86049000	morphology	C0936282
126337	A	GADD153 MYXOID LIPOSARCOMA, INCLUDED	269469005	disease	C1261473
126337	A	GADD153 MYXOID LIPOSARCOMA, INCLUDED	367651003	morphology	C1288351
126337	A	GADD153 MYXOID LIPOSARCOMA, INCLUDED	127331007	disease	C1290833
126337	A	GADD153 MYXOID LIPOSARCOMA, INCLUDED	372151005	morphology	C1299262
126337	A	GADD153 MYXOID LIPOSARCOMA, INCLUDED	372010005	disease	C1299302
126337	A	GADD153 MYXOID LIPOSARCOMA, INCLUDED	400186008	disease	C1302872
126337	A	GADD153 MYXOID LIPOSARCOMA, INCLUDED	372087000	disease	C1306459
126337	A	GADD153 MYXOID LIPOSARCOMA, INCLUDED	86049000	morphology	C1306459
126337	A	GADD153 MYXOID LIPOSARCOMA, INCLUDED	94047004	disease	C1314758
126650	A	DOWNREGULATED IN ADENOMA	32048006	morphology	C0001430
126650	A	DOWNREGULATED IN ADENOMA	3898006	morphology	C0086692
126650	A	DOWNREGULATED IN ADENOMA	118285006	morphology	C0205853
126650	A	DOWNREGULATED IN ADENOMA	115215004	morphology	C0334275
126650	A	DOWNREGULATED IN ADENOMA	399908004	morphology	C1302714
126650	A	DOWNREGULATED IN ADENOMA	400207007	morphology	C1302886
126700	P	Pigmentary disturbances with secondary calcifications	363346000	disease	C0006826
126700	P	Pigmentary disturbances with secondary calcifications	14799000	morphology	C0013930
126700	P	Pigmentary disturbances with secondary calcifications	128462008	disease	C0027627
126700	P	Pigmentary disturbances with secondary calcifications	14799000	morphology	C0027627
126700	P	Pigmentary disturbances with secondary calcifications	367651003	morphology	C1288351
126900	A	PLANTAR FIBROMAS, INCLUDED	112682009	morphology	C0016045
126900	A	PLANTAR FIBROMAS, INCLUDED	3898006	morphology	C0086692
126900	A	PLANTAR FIBROMAS, INCLUDED	115225009	morphology	C1261359
126900	A	PLANTAR FIBROMAS, INCLUDED	400078005	morphology	C1302818
127550	P	Squamous cell carcinoma of the skin	363346000	disease	C0006826
127550	P	Squamous cell carcinoma of the skin	68453008	morphology	C0007097
127550	P	Squamous cell carcinoma of the skin	372130007	disease	C0007114
127550	P	Squamous cell carcinoma of the skin	28899001	morphology	C0007137
127550	P	Squamous cell carcinoma of the skin	402815007	disease	C0007137
127550	P	Squamous cell carcinoma of the skin	126488004	disease	C0037286
127550	P	Squamous cell carcinoma of the skin	387837005	disease	C0037579
127550	P	Squamous cell carcinoma of the skin	118285006	morphology	C0205853
127550	P	Squamous cell carcinoma of the skin	118286007	morphology	C0206720
127550	P	Squamous cell carcinoma of the skin	254649008	disease	C0345976
127550	P	Squamous cell carcinoma of the skin	252988009	morphology	C0474799
127550	P	Squamous cell carcinoma of the skin	254651007	disease	C0553723
127550	P	Squamous cell carcinoma of the skin	86049000	morphology	C0936282
127550	P	Squamous cell carcinoma of the skin	269469005	disease	C1261473
127550	P	Squamous cell carcinoma of the skin	402811003	disease	C1274252
127550	P	Squamous cell carcinoma of the skin	367651003	morphology	C1288351
127550	P	Squamous cell carcinoma of the skin	127331007	disease	C1290833
127550	P	Squamous cell carcinoma of the skin	399879007	morphology	C1302694
127550	P	Squamous cell carcinoma of the skin	400155002	morphology	C1302853
127550	P	Squamous cell carcinoma of the skin	400186008	disease	C1302872
127550	P	Squamous cell carcinoma of the skin	86049000	morphology	C1306459
127820	A	OSTEOCHONDROMATOSIS, DOMINANT CARPOTARSAL	66467005	morphology	C0008476
127820	A	OSTEOCHONDROMATOSIS, DOMINANT CARPOTARSAL	86251006	morphology	C0027651
127820	T	DYSPLASIA EPIPHYSEALIS HEMIMELICA WITH CHONDROMAS AND OSTEOCHONDROMAS	52299001	morphology	C0029423
127820	T	DYSPLASIA EPIPHYSEALIS HEMIMELICA WITH CHONDROMAS AND OSTEOCHONDROMAS	3898006	morphology	C0086692
127820	A	OSTEOCHONDROMATOSIS, DOMINANT CARPOTARSAL	66467005	morphology	C0206641
127820	A	OSTEOCHONDROMATOSIS, DOMINANT CARPOTARSAL	86251006	morphology	C0677041
127820	T	DYSPLASIA EPIPHYSEALIS HEMIMELICA WITH CHONDROMAS AND OSTEOCHONDROMAS	31186001	morphology	C0936248
127820	T	DYSPLASIA EPIPHYSEALIS HEMIMELICA WITH CHONDROMAS AND OSTEOCHONDROMAS	115237006	morphology	C1266164
127820	T	DYSPLASIA EPIPHYSEALIS HEMIMELICA WITH CHONDROMAS AND OSTEOCHONDROMAS	31186001	morphology	C1704356
128300	T	EAR EXOSTOSES	126537000	disease	C0005967
128300	T	EAR EXOSTOSES	20376005	disease	C0086692
128300	T	EAR EXOSTOSES	3898006	morphology	C0086692
128300	T	EAR EXOSTOSES	92027006	disease	C0153959
128300	T	EAR EXOSTOSES	92027006	disease	C0684516
128300	T	EAR EXOSTOSES	363229000	disease	C1285375
128300	T	EAR EXOSTOSES	127331007	disease	C1290833
128300	T	EAR EXOSTOSES	416189003	disease	C1442903
129900	P	Majority of EEC cases appear to be secondary to TP63 (603273) mutations	363346000	disease	C0006826
129900	P	Majority of EEC cases appear to be secondary to TP63 (603273) mutations	14799000	morphology	C0013930
129900	P	Majority of EEC cases appear to be secondary to TP63 (603273) mutations	128462008	disease	C0027627
129900	P	Majority of EEC cases appear to be secondary to TP63 (603273) mutations	14799000	morphology	C0027627
129900	P	Majority of EEC cases appear to be secondary to TP63 (603273) mutations	367651003	morphology	C1288351
130650	P	Adrenal carcinoma	128050000	disease	C0000735
130650	P	Adrenal carcinoma	127022002	disease	C0001618
130650	P	Adrenal carcinoma	127021009	disease	C0001624
130650	P	Adrenal carcinoma	363346000	disease	C0006826
130650	P	Adrenal carcinoma	68453008	morphology	C0007097
130650	P	Adrenal carcinoma	387922007	disease	C0014132
130650	P	Adrenal carcinoma	387927001	disease	C0014132
130650	P	Wilms tumor	126880001	disease	C0022665
130650	P	Gonadoblastoma	86251006	morphology	C0027651
130650	P	Wilms tumor	25081006	morphology	C0027708
130650	P	Wilms tumor	302849000	disease	C0027708
130650	P	Wilms tumor	126644004	disease	C0030793
130650	P	Adrenal carcinoma	126872008	disease	C0035358
130650	P	Wilms tumor	126879004	disease	C0042076
130650	P	Adrenal carcinoma	363420003	disease	C0153465
130650	P	Adrenal carcinoma	94092006	disease	C0153465
130650	P	Adrenal carcinoma	371982006	disease	C0153658
130650	P	Adrenal carcinoma	188366002	disease	C0153662
130650	P	Wilms tumor	363484005	disease	C0153663
130650	P	Wilms tumor	93953009	disease	C0153663
130650	P	Wilms tumor	271468000	disease	C0178251
130650	P	Gonadoblastoma	115233005	morphology	C0205851
130650	P	Adrenal carcinoma	118285006	morphology	C0205853
130650	P	Hepatoblastoma	45024009	morphology	C0206624
130650	P	Gonadoblastoma	74751003	morphology	C0206661
130650	P	Adrenal carcinoma	255035007	disease	C0206686
130650	P	Wilms tumor	188250002	disease	C0346248
130650	P	Adrenal carcinoma	371964008	disease	C0346402
130650	P	Adrenal carcinoma	94111002	disease	C0346955
130650	P	Hepatoblastoma	115229003	morphology	C0476141
130650	P	Gonadoblastoma	86251006	morphology	C0677041
130650	P	Adrenal carcinoma	93839008	disease	C0684842
130650	P	Wilms tumor	363518003	disease	C0740457
130650	P	Wilms tumor	93849006	disease	C0740457
130650	P	Adrenal carcinoma	363355002	disease	C0750887
130650	P	Adrenal carcinoma	93665005	disease	C0750887
130650	P	Wilms tumor	94125001	disease	C0751571
130650	P	Adrenal carcinoma	86049000	morphology	C0936282
130650	P	Adrenal carcinoma	367651003	morphology	C1288351
130650	P	Adrenal carcinoma	126637008	disease	C1290306
130650	P	Adrenal carcinoma	126643005	disease	C1290312
130650	P	Adrenal carcinoma	127331007	disease	C1290833
130650	P	Adrenal carcinoma	371963002	disease	C1299269
130650	P	Adrenal carcinoma	371983001	disease	C1299280
130650	P	Adrenal carcinoma	399879007	morphology	C1302694
130650	P	Adrenal carcinoma	94111002	disease	C1304852
130650	P	Adrenal carcinoma	93665005	disease	C1304868
130650	P	Wilms tumor	93849006	disease	C1306058
130650	P	Adrenal carcinoma	94092006	disease	C1306094
130650	P	Wilms tumor	93953009	disease	C1306155
130650	P	Adrenal carcinoma	372087000	disease	C1306459
130650	P	Adrenal carcinoma	86049000	morphology	C1306459
130650	P	Wilms tumor	94125001	disease	C1306549
130650	P	Adrenal carcinoma	255035007	disease	C1370740
131100	A	WERMER SYNDROME MEN1 GENE, INCLUDED	128050000	disease	C0000735
131100	P	Adrenocortical adenomas	32048006	morphology	C0001430
131100	A	ENDOCRINE ADENOMATOSIS, MULTIPLE	70921007	morphology	C0001436
131100	AV	ADRENAL ADENOMA, SOMATIC	127021009	disease	C0001624
131100	P	Facial angiofibromas	92384009	disease	C0004998
131100	A	WERMER SYNDROME MEN1 GENE, INCLUDED	126952004	disease	C0006118
131100	A	WERMER SYNDROME MEN1 GENE, INCLUDED	254935002	disease	C0006118
131100	AV	CARCINOID TUMOR OF LUNG	363346000	disease	C0006826
131100	P	Carcinoid tumors	189607006	morphology	C0007095
131100	A	WERMER SYNDROME MEN1 GENE, INCLUDED	128348002	disease	C0012243
131100	A	WERMER SYNDROME MEN1 GENE, INCLUDED	387922007	disease	C0014132
131100	A	WERMER SYNDROME MEN1 GENE, INCLUDED	387927001	disease	C0014132
131100	P	Gastrinoma	16189002	morphology	C0017150
131100	P	Gastrinoma	302824004	disease	C0017150
131100	P	Glucagonoma	128855009	morphology	C0017689
131100	P	Glucagonoma	302823005	disease	C0017689
131100	A	WERMER SYNDROME MEN1 GENE, INCLUDED	255055008	disease	C0018671
131100	A	WERMER SYNDROME MEN1 GENE, INCLUDED	126631009	disease	C0018675
131100	A	WERMER SYNDROME MEN1 GENE, INCLUDED	254968009	disease	C0020659
131100	P	Insulinoma	25324008	morphology	C0021670
131100	P	Insulinoma	302822000	disease	C0021670
131100	P	Pancreatic islet cell adenoma	76345009	morphology	C0022134
131100	P	Subcutaneous lipomas	46720004	morphology	C0023798
131100	P	Subcutaneous lipomas	93163002	disease	C0023798
131100	AV	CARCINOID TUMOR OF LUNG	126713003	disease	C0024121
131100	AV	PROLACTINOMA, HYPERPARATHYROIDISM, CARCINOID SYNDROME	35868009	disease	C0024586
131100	A	WERMER SYNDROME MEN1 GENE, INCLUDED	30664006	disease	C0025267
131100	P	Parathyroid adenoma	126635000	disease	C0027533
131100	A	ENDOCRINE ADENOMATOSIS, MULTIPLE	86251006	morphology	C0027651
131100	A	WERMER SYNDROME MEN1 GENE, INCLUDED	46724008	disease	C0027662
131100	A	ENDOCRINE ADENOMATOSIS, MULTIPLE	60549007	morphology	C0027662
131100	A	WERMER SYNDROME MEN1 GENE, INCLUDED	126950007	disease	C0027766
131100	A	WERMER SYNDROME MEN1 GENE, INCLUDED	126859007	disease	C0030297
131100	P	Parathyroid adenoma	127020005	disease	C0030521
131100	P	Pituitary adenoma	128664001	morphology	C0032000
131100	P	Prolactinoma	254956000	disease	C0032000
131100	A	WERMER SYNDROME MEN1 GENE, INCLUDED	127024001	disease	C0032019
131100	A	ENDOCRINE ADENOMATOSIS, MULTIPLE	70921007	morphology	C0032580
131100	P	Prolactinoma	134209002	disease	C0033375
131100	P	Prolactinoma	34337008	morphology	C0033375
131100	AV	CARCINOID TUMOR OF LUNG	126667002	disease	C0035244
131100	A	WERMER SYNDROME MEN1 GENE, INCLUDED	126872008	disease	C0035358
131100	P	Facial angiofibromas	126488004	disease	C0037286
131100	P	Facial angiofibromas	387837005	disease	C0037579
131100	AV	CARCINOID TUMOR OF LUNG	255058005	disease	C0039981
131100	A	WERMER SYNDROME MEN1 GENE, INCLUDED	126951006	disease	C0085136
131100	P	Facial angiofibromas	20376005	disease	C0086692
131100	A	ENDOCRINE ADENOMATOSIS, MULTIPLE	3898006	morphology	C0086692
131100	AV	CARCINOID TUMOR OF LUNG	188361007	disease	C0153661
131100	AV	ADRENAL ADENOMA, SOMATIC	91967007	disease	C0154040
131100	P	Parathyroid adenoma	92272009	disease	C0154041
131100	A	WERMER SYNDROME MEN1 GENE, INCLUDED	269496008	disease	C0154116
131100	A	WERMER SYNDROME MEN1 GENE, INCLUDED	118616009	disease	C0154129
131100	A	ENDOCRINE ADENOMATOSIS, MULTIPLE	118285006	morphology	C0205853
131100	P	Subcutaneous lipomas	115227001	morphology	C0206631
131100	P	Subcutaneous lipomas	254827004	disease	C0206631
131100	AV	ADRENAL ADENOMA, SOMATIC	255036008	disease	C0206667
131100	P	Facial angiofibromas	302857002	disease	C0206731
131100	P	Facial angiofibromas	60392001	morphology	C0206731
131100	P	Carcinoid tumors	128928004	morphology	C0206754
131100	P	Gastrinoma	255046005	disease	C0206754
131100	A	WERMER SYNDROME MEN1 GENE, INCLUDED	237596009	disease	C0242363
131100	P	Pancreatic islet cell adenoma	399528006	morphology	C0242363
131100	P	Pancreatic islet cell adenoma	76345009	morphology	C0242363
131100	AV	CARCINOID TUMOR OF LUNG	363358000	disease	C0242379
131100	AV	CARCINOID TUMOR OF LUNG	93880001	disease	C0242379
131100	P	Parathyroid adenoma	128474007	disease	C0262587
131100	P	Facial angiofibromas	36025004	disease	C0265319
131100	AV	CARCINOID TUMOR OF LUNG	254627002	disease	C0280089
131100	P	Facial angiofibromas	115235003	morphology	C0282607
131100	P	Facial angiofibromas	126736007	disease	C0282607
131100	A	WERMER SYNDROME MEN1 GENE, INCLUDED	46724008	disease	C0311355
131100	A	ENDOCRINE ADENOMATOSIS, MULTIPLE	115215004	morphology	C0334275
131100	P	Facial angiofibromas	60392001	morphology	C0334428
131100	P	Facial angiofibromas	92069005	disease	C0334450
131100	P	Gastrinoma	237832001	disease	C0342562
131100	A	WERMER SYNDROME MEN1 GENE, INCLUDED	254532005	disease	C0345760
131100	AV	CARCINOID TUMOR OF LUNG	254618003	disease	C0345942
131100	AV	CARCINOID TUMOR OF LUNG	254624009	disease	C0345954
131100	AV	CARCINOID TUMOR OF LUNG	254625005	disease	C0345955
131100	P	Subcutaneous lipomas	254830006	disease	C0346118
131100	P	Parathyroid adenoma	255057000	disease	C0346433
131100	AV	ADRENAL ADENOMA, SOMATIC	255061006	disease	C0346444
131100	A	WERMER SYNDROME MEN1 GENE, INCLUDED	94978003	disease	C0346487
131100	A	WERMER SYNDROME MEN1 GENE, INCLUDED	94963005	disease	C0346545
131100	AV	CARCINOID TUMOR OF LUNG	93986008	disease	C0346616
131100	AV	CARCINOID TUMOR OF LUNG	94111002	disease	C0346955
131100	P	Prolactinoma	92048008	disease	C0347509
131100	P	Prolactinoma	255200003	disease	C0347514
131100	P	Parathyroid adenoma	92085000	disease	C0347524
131100	A	WERMER SYNDROME MEN1 GENE, INCLUDED	189487001	disease	C0349015
131100	P	Prolactinoma	189162003	disease	C0349059
131100	P	Subcutaneous lipomas	134328007	morphology	C0431102
131100	P	Carcinoid tumors	252998003	morphology	C0474803
131100	AV	ADRENAL ADENOMA, SOMATIC	92433007	disease	C0496873
131100	P	Prolactinoma	92030004	disease	C0496899
131100	P	Prolactinoma	92296004	disease	C0496901
131100	A	WERMER SYNDROME MEN1 GENE, INCLUDED	94767002	disease	C0496936
131100	A	WERMER SYNDROME MEN1 GENE, INCLUDED	95004009	disease	C0496944
131100	A	WERMER SYNDROME MEN1 GENE, INCLUDED	94820008	disease	C0496950
131100	P	Prolactinoma	92247009	disease	C0497550
131100	A	ENDOCRINE ADENOMATOSIS, MULTIPLE	86251006	morphology	C0677041
131100	P	Prolactinoma	92131002	disease	C0684803
131100	A	WERMER SYNDROME MEN1 GENE, INCLUDED	94864000	disease	C0684804
131100	P	Parathyroid adenoma	92246000	disease	C0684815
131100	AV	ADRENAL ADENOMA, SOMATIC	92454000	disease	C0684822
[truncated: 19,851 more rows]
