# Supplementary material for: Network Modeling Identifies Molecular Functions Targeted by miR-204 to Suppress Head and Neck Tumor Metastasis
Source: PubMed Central journal article supplement (PMC2848541; doi:10.1371/journal.pcbi.1000730), 2010-04-01
Supplement: pcbi.1000730.s002.pdf [file pcbi.1000730.s002.pdf]

**Supporting Table 1. Generation of miRNOME by merging five microRNA target databases (related to Figure 1A ).** Five microRNA gene target databases were downloaded and parsed to set up the comprehensive human microRNA target genes (miRNOME). MiRNOME contains 534 human microRNAs and 17,343 predicted putative microRNA gene targets allowing predictions of more microRNAs targets than any of the individual microRNA target dataset.

| <b>Database</b> | <b>Version</b>                                                | <b>Downloaded file</b>                          | <b>Downloaded date</b> |
|-----------------|---------------------------------------------------------------|-------------------------------------------------|------------------------|
| TargetScan      | 3.1                                                           | Conserved_Family_Conserve<br>d_Targets_Info.txt | July-17-2007           |
| PicTar          | hg17<br>server version 4.0.24                                 | picTarMiRNA4Way.txt                             | July-13-2007           |
| miRBase         | 4<br>based on ensembl 40 and<br>microRNA regisgry release 9.0 | v4.txt.homo_sapiens                             | July-17-2007           |
| miRanda         | Old version                                                   | by_gene140.xls                                  | July-13-2007           |
| TarBase         | TarBase_V4.0                                                  | miRNA_Human_Table.txt                           | July-13-2007           |

**Supporting Table 2. 34 putative tumor suppressor microRNAs reproducibly predicted by IMRE in two HNSCC microarrays (related to Figure 1A).** Note: the asterisk, "\*", is part of the microRNA name and represents a passenger strand form of the microRNA (less dominant form)

| microRNA<br>(alphabetic order) | FDR             |              |
|--------------------------------|-----------------|--------------|
|                                | GSE6631         | GSE2379      |
| miR-29                         | 8.00E-03        | 0.003        |
| miR-29a                        | 1.00E-03        | 0.001        |
| miR-29b                        | 1.00E-03        | 0.002        |
| miR-29c                        | 1.00E-03        | 0.004        |
| miR-30e-3p                     | 9.00E-03        | 0.045        |
| miR-92b                        | 1.00E-03        | 0.002        |
| miR-98                         | 7.00E-03        | 0.001        |
| miR-132                        | 1.00E-03        | 0.018        |
| miR-126/126-3p                 | 2.00E-03        | 0.026        |
| miR-139                        | 1.00E-03        | 0.001        |
| miR-181d                       | 1.00E-03        | 0.031        |
| miR-182*                       | 1.00E-03        | 0.008        |
| miR-18b                        | 9.00E-03        | 0.017        |
| miR-193a                       | 3.00E-03        | 0.017        |
| miR-193b                       | 3.50E-02        | 0.036        |
| miR-196                        | 1.00E-03        | 0.022        |
| <b>miR-204</b>                 | <b>4.00E-03</b> | <b>0.029</b> |
| miR-211                        | 1.20E-02        | 0.046        |
| miR-330                        | 2.00E-03        | 0.028        |
| miR-361                        | 1.00E-03        | 0.003        |
| miR-376a                       | 2.00E-03        | 0.002        |
| miR-376b                       | 1.00E-03        | 0.004        |
| miR-486                        | 1.00E-03        | 0.023        |
| miR-489                        | 1.00E-03        | 0.008        |
| miR-518c                       | 1.00E-02        | 0.008        |
| miR-568                        | 1.00E-03        | 0.001        |
| miR-577                        | 9.00E-03        | 0.013        |
| miR-586                        | 8.00E-03        | 0.002        |
| miR-595                        | 1.00E-03        | 0.001        |
| miR-660                        | 6.00E-03        | 0.017        |
| miR-let-7/98                   | 5.00E-03        | 0.001        |
| miR-let-7b                     | 2.00E-03        | 0.001        |
| miR-let-7g                     | 2.00E-03        | 0.001        |
| miR-let-7i                     | 1.00E-03        | 0.001        |

**Supporting Table 3. Statistical analysis of microRNA enrichment in the cancer gene subset of OMIM** (related to **Figure 1A**, approach described in **Methods** and in **Protocols S1-S2**, evaluated against a review of literature **Table S4**). To further reduce the number of microRNAs to the most promising candidates amenable for biological characterization, we conducted a statistical enrichment analysis in the OMIM human disease gene database (Online Mendelian Inheritance in Man) containing 610 biologically validated cancer genes among which 586 (96%) are predicted targets of 527 microRNAs in miRNOME. The validity of OMIM-based genetic analysis of cancer microRNA enrichment was confirmed by a review of literature showing that 35 out of 46 “OMIM-predicted cancer microRNAs” were indeed linked to cancer (**Table S4**), significantly more than expected by chance ( $P = 1.6 \times 10^{-9}$ , one side cumulative hypergeometric test, total microRNAs in miRNOME=534, total reviewed microRNAs=183). The resulting *P*-values were adjusted to correct for multiple comparisons (**Methods**) and false positive *P*-values derived from the hierarchical classifications were contr

| microRNAs                    | Unadjusted <i>P</i> -value | Adjusted <i>P</i> -value | SNOMED CT concept (see Protocol S1)                                                     |
|------------------------------|----------------------------|--------------------------|-----------------------------------------------------------------------------------------|
| miR-106b                     | 6.29E-08                   | 2.75E-05                 | Malignant neoplasm, primary (morphologic abnormality)                                   |
|                              | 1.55E-07                   | 6.77E-05                 | Malignant neoplasm of primary, secondary, or uncertain origin (morphologic abnormality) |
| miR-128                      | 2.15E-05                   | 1.29E-02                 | Primary malignant neoplasm (disorder)                                                   |
|                              | 7.32E-05                   | 4.34E-02                 | Neoplasm by body site (disorder)                                                        |
| miR-134                      | 2.75E-08                   | 1.20E-05                 | Synovial sarcoma (morphologic abnormality)                                              |
|                              | 2.80E-08                   | 1.70E-05                 | Synovial sarcoma (disorder)                                                             |
|                              | 1.91E-06                   | 8.34E-04                 | Malignant neoplasm, primary (morphologic abnormality)                                   |
|                              | 2.88E-06                   | 1.26E-03                 | Sarcoma, no ICD-O subtype (morphologic abnormality)                                     |
|                              | 3.85E-06                   | 1.68E-03                 | Malignant neoplasm of primary, secondary, or uncertain origin (morphologic abnormality) |
|                              | 3.69E-05                   | 1.60E-02                 | Soft tissue tumor AND/OR sarcoma (morphologic abnormality)                              |
|                              | 3.69E-05                   | 1.60E-02                 | Sarcoma -category (morphologic abnormality)                                             |
| miR-17_5p                    | 5.10E-05                   | 2.20E-02                 | Malignant neoplasm of primary, secondary, or uncertain origin (morphologic abnormality) |
|                              | 5.15E-05                   | 2.23E-02                 | Malignant neoplasm, primary (morphologic abnormality)                                   |
| miR-17-5p/20/93.mr/106/519.d | 3.42E-05                   | 1.48E-02                 | Malignant neoplasm, primary (morphologic abnormality)                                   |
|                              | 5.70E-05                   | 2.46E-02                 | Malignant neoplasm of primary, secondary, or uncertain origin (morphologic abnormality) |
| miR-181                      | 1.32E-05                   | 5.75E-03                 | Hematopoietic neoplasm (morphologic abnormality)                                        |
|                              | 4.56E-05                   | 1.97E-02                 | Malignant hematopoietic neoplasm (morphologic abnormality)                              |
| miR-181a                     | 3.64E-05                   | 2.18E-02                 | Neoplasm of musculoskeletal system (disorder)                                           |
| miR-181b                     | 4.80E-08                   | 2.91E-05                 | Neoplasm of musculoskeletal system (disorder)                                           |
|                              | 7.20E-07                   | 3.15E-04                 | Synovial sarcoma (morphologic abnormality)                                              |
|                              | 1.16E-06                   | 7.03E-04                 | Synovial sarcoma (disorder)                                                             |
|                              | 3.33E-05                   | 2.00E-02                 | Primary malignant neoplasm of soft tissues (disorder)                                   |
|                              | 4.79E-05                   | 2.86E-02                 | Malignant tumor of stomach (disorder)                                                   |
| miR-181c                     | 9.27E-07                   | 4.05E-04                 | Synovial sarcoma (morphologic abnormality)                                              |
|                              | 1.20E-06                   | 7.27E-04                 | Synovial sarcoma (disorder)                                                             |
| miR-181d                     | 2.08E-05                   | 9.05E-03                 | Synovial sarcoma (morphologic abnormality)                                              |
|                              | 1.90E-05                   | 1.14E-02                 | Neoplasm of musculoskeletal system (disorder)                                           |
|                              | 2.62E-05                   | 1.58E-02                 | Synovial sarcoma (disorder)                                                             |
| miR-183                      | 4.34E-05                   | 2.60E-02                 | Primary malignant neoplasm of soft tissues (disorder)                                   |
|                              | 7.50E-05                   | 3.22E-02                 | Synovial sarcoma (morphologic abnormality)                                              |

| microRNAs   | Unadjusted <i>P</i> -value | Adjusted <i>P</i> -value | SNOMED CT concept (see Protocol S1)                                                                     |
|-------------|----------------------------|--------------------------|---------------------------------------------------------------------------------------------------------|
|             | 7.07E-05                   | 4.19E-02                 | Synovial sarcoma (disorder)                                                                             |
| miR-185     | 2.45E-06                   | 1.07E-03                 | Synovial sarcoma (morphologic abnormality)                                                              |
|             | 2.48E-06                   | 1.50E-03                 | Synovial sarcoma (disorder)                                                                             |
| miR-187     | 1.26E-07                   | 7.64E-05                 | Neoplasm of musculoskeletal system (disorder)                                                           |
|             | 3.06E-06                   | 1.34E-03                 | Synovial sarcoma (morphologic abnormality)                                                              |
|             | 4.59E-06                   | 2.78E-03                 | Synovial sarcoma (disorder)                                                                             |
| miR-18a*    | 5.17E-07                   | 2.26E-04                 | Synovial sarcoma (morphologic abnormality)                                                              |
|             | 3.91E-07                   | 2.37E-04                 | Synovial sarcoma (disorder)                                                                             |
|             | 1.16E-05                   | 7.00E-03                 | Malignant neoplasm of soft tissue (disorder)                                                            |
|             | 1.87E-05                   | 1.13E-02                 | Primary malignant neoplasm of soft tissues (disorder)                                                   |
| miR-193     | 4.76E-07                   | 2.08E-04                 | Acute myeloid leukemia, no ICD-O subtype (morphologic abnormality)                                      |
|             | 2.06E-06                   | 9.00E-04                 | Myeloid leukemia, no ICD-O subtype (morphologic abnormality)                                            |
|             | 5.22E-05                   | 3.11E-02                 | Primary malignant neoplasm (disorder)                                                                   |
|             | 9.63E-05                   | 4.12E-02                 | Acute leukemia, morphology, including blast cell OR undifferentiated leukemia (morphologic abnormality) |
| miR-197     | 1.06E-09                   | 4.63E-07                 | Synovial sarcoma (morphologic abnormality)                                                              |
|             | 1.70E-09                   | 1.03E-06                 | Synovial sarcoma (disorder)                                                                             |
| miR-20      | 7.13E-05                   | 3.07E-02                 | Malignant neoplasm, primary (morphologic abnormality)                                                   |
|             | 1.03E-04                   | 4.40E-02                 | Malignant neoplasm of primary, secondary, or uncertain origin (morphologic abnormality)                 |
| miR-204     | 1.07E-05                   | 4.67E-03                 | Malignant lymphoma - category (morphologic abnormality)                                                 |
|             | 1.15E-05                   | 5.01E-03                 | Malignant lymphoma, no ICD-O subtype (morphologic abnormality)                                          |
|             | 4.78E-05                   | 2.07E-02                 | Lymphoid neoplasm (morphologic abnormality)                                                             |
| miR-20a     | 4.89E-07                   | 2.14E-04                 | Malignant neoplasm, primary (morphologic abnormality)                                                   |
|             | 1.04E-06                   | 4.54E-04                 | Malignant neoplasm of primary, secondary, or uncertain origin (morphologic abnormality)                 |
| miR-211     | 4.09E-07                   | 1.79E-04                 | Malignant lymphoma, no ICD-O subtype (morphologic abnormality)                                          |
|             | 2.60E-06                   | 1.14E-03                 | Malignant lymphoma - category (morphologic abnormality)                                                 |
|             | 4.19E-05                   | 1.81E-02                 | Lymphoid neoplasm (morphologic abnormality)                                                             |
| miR-221/222 | 4.49E-05                   | 1.94E-02                 | Leukemia, no ICD-O subtype (morphologic abnormality)                                                    |
|             | 4.84E-05                   | 2.09E-02                 | Leukemia - category (morphologic abnormality)                                                           |
|             | 8.32E-05                   | 4.92E-02                 | Leukemia, disease (disorder)                                                                            |
| miR-27      | 8.85E-05                   | 3.79E-02                 | Astrocytoma, no ICD-O subtype (morphologic abnormality)                                                 |
| miR-30-5p   | 2.10E-05                   | 9.14E-03                 | Malignant hematopoietic neoplasm (morphologic abnormality)                                              |
|             | 3.60E-05                   | 1.56E-02                 | Myeloid leukemia, no ICD-O subtype (morphologic abnormality)                                            |
| miR-320     | 2.42E-05                   | 1.05E-02                 | Malignant neoplasm of primary, secondary, or uncertain origin (morphologic abnormality)                 |
| miR-381     | 8.19E-05                   | 3.52E-02                 | Myeloid leukemia, no ICD-O subtype (morphologic abnormality)                                            |
| miR-409-5p  | 1.30E-08                   | 5.68E-06                 | Synovial sarcoma (morphologic abnormality)                                                              |
|             | 1.62E-08                   | 9.82E-06                 | Synovial sarcoma (disorder)                                                                             |
|             | 3.51E-07                   | 2.13E-04                 | Primary malignant neoplasm of soft tissues (disorder)                                                   |
|             | 8.34E-06                   | 5.04E-03                 | Malignant neoplasm of soft tissue (disorder)                                                            |
|             | 5.07E-05                   | 2.19E-02                 | Sarcoma, no ICD-O subtype (morphologic abnormality)                                                     |
| miR-431     | 6.51E-05                   | 2.80E-02                 | Synovial sarcoma (morphologic abnormality)                                                              |
|             | 5.87E-05                   | 3.49E-02                 | Synovial sarcoma (disorder)                                                                             |
| miR-452     | 1.99E-08                   | 8.70E-06                 | Synovial sarcoma (morphologic abnormality)                                                              |
|             | 2.96E-08                   | 1.79E-05                 | Synovial sarcoma (disorder)                                                                             |
|             | 8.01E-05                   | 3.44E-02                 | Sarcoma, no ICD-O subtype (morphologic abnormality)                                                     |

| microRNAs                                | Unadjusted <i>P</i> -value | Adjusted <i>P</i> -value | SNOMED CT concept (see Protocol S1)                                                                     |
|------------------------------------------|----------------------------|--------------------------|---------------------------------------------------------------------------------------------------------|
| miR-500                                  | 9.07E-13                   | 5.50E-10                 | Synovial sarcoma (disorder)                                                                             |
|                                          | 1.49E-12                   | 6.51E-10                 | Synovial sarcoma (morphologic abnormality)                                                              |
|                                          | 5.98E-08                   | 2.61E-05                 | Sarcoma, no ICD-O subtype (morphologic abnormality)                                                     |
|                                          | 1.12E-06                   | 4.89E-04                 | Soft tissue tumor AND/OR sarcoma (morphologic abnormality)                                              |
|                                          | 1.12E-06                   | 4.89E-04                 | Sarcoma -category (morphologic abnormality)                                                             |
| miR-505                                  | 4.69E-08                   | 2.05E-05                 | Synovial sarcoma (morphologic abnormality)                                                              |
|                                          | 3.52E-08                   | 2.13E-05                 | Synovial sarcoma (disorder)                                                                             |
|                                          | 1.03E-05                   | 6.22E-03                 | Primary malignant neoplasm of soft tissues (disorder)                                                   |
|                                          | 1.63E-05                   | 9.83E-03                 | Neoplasm of musculoskeletal system (disorder)                                                           |
| miR-574                                  | 2.18E-07                   | 1.32E-04                 | Synovial sarcoma (disorder)                                                                             |
|                                          | 3.33E-07                   | 1.46E-04                 | Synovial sarcoma (morphologic abnormality)                                                              |
| miR-579                                  | 1.34E-09                   | 5.86E-07                 | Synovial sarcoma (morphologic abnormality)                                                              |
|                                          | 2.18E-09                   | 1.32E-06                 | Synovial sarcoma (disorder)                                                                             |
|                                          | 4.12E-06                   | 1.80E-03                 | Sarcoma, no ICD-O subtype (morphologic abnormality)                                                     |
|                                          | 2.35E-05                   | 1.02E-02                 | Soft tissue tumor AND/OR sarcoma (morphologic abnormality)                                              |
|                                          | 2.35E-05                   | 1.02E-02                 | Sarcoma -category (morphologic abnormality)                                                             |
| miR-586                                  | 3.07E-06                   | 1.86E-03                 | Synovial sarcoma (disorder)                                                                             |
|                                          | 5.04E-06                   | 2.20E-03                 | Synovial sarcoma (morphologic abnormality)                                                              |
| miR-595                                  | 3.07E-06                   | 1.86E-03                 | Synovial sarcoma (disorder)                                                                             |
|                                          | 4.68E-06                   | 2.04E-03                 | Synovial sarcoma (morphologic abnormality)                                                              |
|                                          | 1.11E-05                   | 6.70E-03                 | Primary malignant neoplasm of soft tissues (disorder)                                                   |
|                                          | 1.16E-05                   | 7.00E-03                 | Malignant neoplasm of soft tissue (disorder)                                                            |
| miR-652                                  | 2.02E-06                   | 8.82E-04                 | Synovial sarcoma (morphologic abnormality)                                                              |
|                                          | 3.88E-06                   | 2.35E-03                 | Synovial sarcoma (disorder)                                                                             |
| miR-93                                   | 1.70E-05                   | 7.40E-03                 | Malignant neoplasm of primary, secondary, or uncertain origin (morphologic abnormality)                 |
|                                          | 1.87E-05                   | 8.14E-03                 | Malignant neoplasm, primary (morphologic abnormality)                                                   |
| miR-93.hd/291-3p/294/295/302/372/373/520 | 1.01E-06                   | 4.41E-04                 | Malignant hematopoietic neoplasm (morphologic abnormality)                                              |
|                                          | 1.98E-05                   | 1.19E-02                 | Leukemia, disease (disorder)                                                                            |
|                                          | 3.58E-05                   | 1.55E-02                 | Leukemia, no ICD-O subtype (morphologic abnormality)                                                    |
|                                          | 3.92E-05                   | 1.70E-02                 | Leukemia - category (morphologic abnormality)                                                           |
| miR-let-7                                | 8.83E-06                   | 5.34E-03                 | Malignant tumor of urinary bladder (disorder)                                                           |
|                                          | 9.50E-05                   | 4.07E-02                 | Acute leukemia, morphology, including blast cell OR undifferentiated leukemia (morphologic abnormality) |
|                                          | 1.14E-04                   | 4.86E-02                 | Central nervous system tumor morphology (morphologic abnormality)                                       |
| miR-let-7a                               | 1.33E-06                   | 5.81E-04                 | Synovial sarcoma (morphologic abnormality)                                                              |
|                                          | 1.16E-06                   | 7.03E-04                 | Synovial sarcoma (disorder)                                                                             |
| miR-let-7b                               | 1.38E-05                   | 6.01E-03                 | Synovial sarcoma (morphologic abnormality)                                                              |
|                                          | 1.44E-05                   | 8.69E-03                 | Synovial sarcoma (disorder)                                                                             |
| miR-let-7c                               | 8.60E-07                   | 3.76E-04                 | Synovial sarcoma (morphologic abnormality)                                                              |
|                                          | 8.65E-07                   | 5.24E-04                 | Synovial sarcoma (disorder)                                                                             |
|                                          | 2.45E-05                   | 1.47E-02                 | Primary malignant neoplasm of soft tissues (disorder)                                                   |
|                                          | 5.16E-05                   | 2.23E-02                 | Sarcoma, no ICD-O subtype (morphologic abnormality)                                                     |
|                                          | 4.09E-05                   | 2.45E-02                 | Neoplasm of musculoskeletal system (disorder)                                                           |
| miR-let-7d                               | 1.10E-05                   | 4.80E-03                 | Synovial sarcoma (morphologic abnormality)                                                              |
|                                          | 1.40E-05                   | 8.45E-03                 | Synovial sarcoma (disorder)                                                                             |
|                                          | 4.59E-07                   | 2.01E-04                 | Synovial sarcoma (morphologic abnormality)                                                              |
|                                          | 5.46E-07                   | 3.31E-04                 | Synovial sarcoma (disorder)                                                                             |

| <b>microRNAs</b> | <b>Unadjusted <i>P</i>-value</b>                         | <b>Adjusted <i>P</i>-value</b>                           | <b>SNOMED CT concept (see Protocol S1)</b>                                                                                                                                                                                          |
|------------------|----------------------------------------------------------|----------------------------------------------------------|-------------------------------------------------------------------------------------------------------------------------------------------------------------------------------------------------------------------------------------|
| miR-let-7e       | 6.32E-06<br>1.51E-05<br>2.18E-05<br>2.53E-05             | 3.82E-03<br>9.11E-03<br>9.48E-03<br>1.52E-02             | Malignant neoplasm of soft tissue (disorder)<br>Primary malignant neoplasm of soft tissues (disorder)<br>Sarcoma, no ICD-O subtype (morphologic abnormality)<br>Neoplasm of musculoskeletal system (disorder)                       |
| miR-let-7f       | 8.39E-07<br>6.38E-07<br>7.70E-06<br>1.78E-05<br>2.98E-05 | 3.67E-04<br>3.87E-04<br>4.66E-03<br>1.07E-02<br>1.79E-02 | Synovial sarcoma (morphologic abnormality)<br>Synovial sarcoma (disorder)<br>Malignant neoplasm of soft tissue (disorder)<br>Primary malignant neoplasm of soft tissues (disorder)<br>Neoplasm of musculoskeletal system (disorder) |
| miR-let-7g       | 1.37E-06<br>1.00E-06                                     | 5.99E-04<br>6.06E-04                                     | Synovial sarcoma (morphologic abnormality)<br>Synovial sarcoma (disorder)                                                                                                                                                           |
| miR-let-7i       | 1.37E-06<br>1.04E-06<br>5.63E-06<br>2.97E-05             | 5.99E-04<br>6.30E-04<br>3.41E-03<br>1.78E-02             | Synovial sarcoma (morphologic abnormality)<br>Synovial sarcoma (disorder)<br>Neoplasm of musculoskeletal system (disorder)<br>Primary malignant neoplasm of soft tissues (disorder)                                                 |

**Supporting Table 4. Literature review of microRNAs down-regulated in cancer (related to Figure S3).** A combinatorial text-based search using two keywords "miRNA" and "cancer" was conducted in PubMed (on Feb. 28 2008). 28 microRNA papers reporting microRNAs down-regulated in cancer compared to a normal tissue were selected and reviewed in details. 133 microRNAs were identified. 123 microRNAs among 133 microRNAs were identified by microRNA array analysis in various types of cancer and only the expression status of 30 out of 133 microRNAs was confirmed by PCR or northern. Note: the asterisk, "\*", is part of the microRNA name and represents a passenger strand form of the microRNA (less dominant form)

| microRNAs<br>(alphabetic order) | Method of detection |          |                                    | Normal control                                                |          | Cancer Type                  | Reference                           |
|---------------------------------|---------------------|----------|------------------------------------|---------------------------------------------------------------|----------|------------------------------|-------------------------------------|
|                                 | Charaterized by     |          | Identified by<br>microRNA<br>Array | Tissue                                                        | Paired   |                              |                                     |
|                                 | PCR                 | Northern |                                    |                                                               |          |                              |                                     |
| let-7                           | √                   |          |                                    | Adjacent normal tissue                                        | Paired   | Colon                        | Biol Pharm Bull (2006) 29, p903     |
|                                 |                     | √        |                                    | Normal adjacent sample                                        |          | Lung                         | Cell (2005) 120, p635               |
| let-7a                          | √                   |          | √                                  | Non-cancerous lung tissue                                     | Paired   | Lung                         | Cancer Cell (2006) 9, p189          |
|                                 |                     |          | √                                  | Normal ovarian tissue                                         | Unpaired | Ovarian                      | Cancer Res (2007) 18, p8699         |
|                                 |                     |          | √                                  | Normal                                                        |          | Breast                       | PNAS (2006) 103, p2257 [let-7a-2]   |
|                                 |                     |          | √                                  | Normal                                                        |          | Prostate                     | PNAS (2006) 103, p2257 [let-7a-2]   |
| let-7b                          | √                   | √        | √                                  | Normal bone marrow control                                    |          | Leukemia                     | PNAS (2007) 11, p19971              |
| let-7c                          |                     |          | √                                  | Normal ovarian tissue                                         | Unpaired | Ovarian                      | Cancer Res (2007) 18, p8699         |
|                                 |                     |          | √                                  | Normal adjacent thyroid tissue                                |          | Thyroid anaplastic carcinoma | Oncogene (2007) 26, p7590           |
| let-7d                          |                     |          | √                                  | Normal ovarian tissue                                         | Unpaired | Ovarian                      | Cancer Res (2007) 18, p8699         |
| let-7f                          |                     |          | √                                  | Normal adjacent tissue or controlateral - normal thyroid lobe |          | Papillary thyroid carcinoma  | Endocr Relat Cancer (2006) 13, p497 |
| let-7g                          |                     |          | √                                  | Normal tissue                                                 |          | CNS                          | Cancer Res (2007) 67, p2456         |
| let-7i                          |                     |          | √                                  | Normal tissue                                                 |          | CNS                          | Cancer Res (2007) 67, p2456         |
| miR-1                           |                     |          | √                                  | Adjacent non-tumorous tissue                                  | Paired   | Colon                        | JAMA (2008) 299, p425               |
| miR-100                         |                     |          | √                                  | Normal ovarian tissue                                         | Unpaired | Ovarian                      | Cancer Res (2007) 18, p8699         |
|                                 |                     |          | √                                  | Normal                                                        |          | Breast                       | PNAS (2006) 103, p2257              |
| miR-101                         |                     |          | √                                  | Corresponding non-cancerous lung tissue                       | Paired   | Lung                         | Cancer Cell (2006) 9, p189          |
|                                 |                     |          | √                                  | Normal ovarian tissue                                         | Unpaired | Ovarian                      | Cancer Res (2007) 18, p8699         |
| miR-103                         |                     |          | √                                  | Normal tissue                                                 |          | CNS                          | Cancer Res (2007) 67, p2456         |
| miR-105                         |                     |          | √                                  | Normal ovarian tissue                                         | Unpaired | Ovarian                      | Cancer Res (2007) 18, p8699         |
| miR-107                         |                     |          | √                                  | Normal tissue                                                 |          | CNS                          | Cancer Res (2007) 67, p2456         |
| miR-10a                         |                     |          | √                                  | Normal tissue                                                 |          | Hematologic                  | Cancer Res (2007) 67, p2456         |

| microRNAs<br>(alphabetic order) | Method of detection |          |                                    | Normal control                          |           | Cancer Type                   | Reference                                   |
|---------------------------------|---------------------|----------|------------------------------------|-----------------------------------------|-----------|-------------------------------|---------------------------------------------|
|                                 | Charaterized by     |          | Identified by<br>microRNA<br>Array | Tissue                                  | Paired    |                               |                                             |
|                                 | PCR                 | Northern |                                    |                                         |           |                               |                                             |
| miR-10b                         |                     |          | √                                  | Normal breast tissue                    | Unpaired  | Breast                        | Cancer Res (2005) 65, p7065                 |
|                                 |                     |          | √                                  | Normal                                  |           | Breast                        | PNAS (2006) 103, p2257                      |
| miR-123                         |                     |          | √                                  | Normal breast tissue                    | Unpaired  | Breast                        | Cancer Res (2005) 65, p7065                 |
| miR-124a                        |                     |          | √                                  | Corresponding non-cancerous lung tissue | Paired    | Lung                          | Cancer Cell (2006) 9, p189                  |
|                                 |                     |          | √                                  | Normal ovarian tissue                   | Unpaired  | Ovarian                       | Cancer Res (2007) 18, p8699                 |
|                                 |                     |          | √                                  | Normal tissue                           |           | CNS                           | Cancer Res (2007) 67, p2456                 |
| miR-124b                        |                     |          | √                                  | Normal tissue                           |           | CNS                           | Cancer Res (2007) 67, p2456                 |
| miR-125                         |                     |          | √                                  | Normal ovarian tissue                   | Unpaired  | Ovarian                       | Cancer Res (2007) 18, p8699                 |
| miR-125a                        |                     | √        | √                                  | Adjacent normal tissue                  | Paired    | Hepatocellular carcinoma      | Oncogene (2006) 25, p2537                   |
|                                 |                     |          | √                                  | Corresponding non-cancerous lung tissue | Paired    | Lung                          | Cancer Cell (2006) 9, p189                  |
|                                 |                     |          | √                                  | Normal adjacent thyroid tissue          |           | Thyroid anaplastic carcinoma  | Oncogene (2007) 26, p7590                   |
| miR-125b                        |                     | √        | √                                  | Normal breast tissue                    | Unpaired  | Breast                        | Cancer Res (2005) 65, p7065                 |
|                                 | √                   | √        | √                                  | Normal adjacent thyroid tissue          |           | Thyroid anaplastic carcinomas | Oncogene (2007) 26, p7590                   |
|                                 |                     |          | √                                  | Normal                                  |           | Breast                        | PNAS (2006) 103, p2257 [miR-125b-1]         |
|                                 |                     |          | √                                  | Normal                                  |           | Breast                        | PNAS (2006) 103, p2257 [miR-125b-2]         |
| miR-126                         |                     |          | √                                  | Corresponding non-cancerous lung tissue | Paired    | Lung                          | Cancer Cell (2006) 9, p189                  |
|                                 |                     |          | √                                  | Normal ovarian tissue                   | Unpaired  | Ovarian                       | Cancer Res (2007) 18, p8699                 |
| miR-126*                        |                     |          | √                                  | Normal                                  |           | Lung                          | PNAS (2006) 103, p2257                      |
| miR-127                         |                     | √        |                                    | Adjacent normal tissue                  | Paired    | Bladder                       | Cancer Cell (2006) 9, p435                  |
|                                 |                     | √        |                                    | Adjacent normal tissue                  | Paired    | Prostate                      | Cancer Cell (2006) 9, p435                  |
|                                 |                     |          | √                                  | Normal ovarian tissue                   | Unpaired  | Ovarian                       | Cancer Res (2007) 18, p8699                 |
| miR-128a                        |                     | √        | √                                  | Normal brain                            | purchased | Glioblastoma                  | Biochem Biophys Res Commu (2005) 334, p1351 |
|                                 |                     |          | √                                  | Normal tissue                           |           | CNS                           | Cancer Res (2007) 67, p2456                 |
|                                 |                     |          | √                                  | Normal                                  |           | Prostate                      | PNAS (2006) 103, p2257                      |
| miR-128b                        |                     |          | √                                  | Normal tissue                           |           | CNS                           | Cancer Res (2007) 67, p2456                 |
| miR-130a                        |                     |          | √                                  | Normal                                  |           | Breast                        | PNAS (2006) 103, p2257                      |
| miR-133a                        |                     |          | √                                  | Normal ovarian tissue                   | Unpaired  | Ovarian                       | Cancer Res (2007) 18, p8699                 |
| miR-133b                        |                     | √        | √                                  | Adjacent normal colorectal tissue       | Paired    | Colon                         | Mol Cancer (2006) 19, p29                   |
| miR-134                         |                     |          | √                                  | Normal tissue                           |           | CNS                           | Cancer Res (2007) 67, p2456                 |
| miR-135                         |                     |          | √                                  | Normal adjacent thyroid tissue          |           | Thyroid anaplastic carcinoma  | Oncogene (2007) 26, p7590                   |
| miR-135a                        |                     |          | √                                  | Normal tissue                           |           | CNS                           | Cancer Res (2007) 67, p2456                 |



| microRNAs<br>(alphabetic order) | Method of detection |          |                                    | Normal control                                              |          | Cancer Type                  | Reference                           |
|---------------------------------|---------------------|----------|------------------------------------|-------------------------------------------------------------|----------|------------------------------|-------------------------------------|
|                                 | Charaterized by     |          | Identified by<br>microRNA<br>Array | Tissue                                                      | Paired   |                              |                                     |
|                                 | PCR                 | Northern |                                    |                                                             |          |                              |                                     |
| miR-136                         |                     |          | √                                  | Normal                                                      |          | Stomach                      | PNAS (2006) 103, p2257              |
| miR-137                         |                     |          | √                                  | Normal tissue                                               |          | CNS                          | Cancer Res (2007) 67, p2456         |
| miR-138                         |                     |          | √                                  | Normal tissue                                               |          | CNS                          | Cancer Res (2007) 67, p2456         |
|                                 |                     |          | √                                  | Normal adjacent thyroid tissue                              |          | Thyroid anaplastic carcinoma | Oncogene (2007) 26, p7590           |
|                                 |                     |          | √                                  | Adjacent normal thyroid tissue                              | Paired   | Papillary thyroid carcinoma  | PNAS (2005) 102, p19075 [miR-138-1] |
|                                 |                     |          | √                                  | Normal                                                      |          | Stomach                      | PNAS (2006) 103, p2257 [miR-138-2]  |
| miR-140                         | √                   |          | √                                  | Normal ovarian tissue                                       |          | Ovarian                      | Cancer Res (2007) 18, p8699         |
|                                 |                     |          | √                                  | Corresponding non-cancerous lung tissue                     | Paired   | Lung                         | Cancer Cell (2006) 9, p189          |
|                                 |                     |          | √                                  | Normal                                                      |          | Breast                       | PNAS (2006) 103, p2257              |
| miR-140-as                      |                     |          | √                                  | Normal breast tissue                                        | Unpaired | Breast                       | Cancer Res (2005) 65, p7065         |
|                                 |                     |          | √                                  | Normal adjacent tissue or contralateral normal thyroid lobe |          | Papillary thyroid carcinoma  | Endocr Relat Cancer (2006) 13, p497 |
|                                 |                     |          | √                                  | Normal adjacent tissue or contralateral normal thyroid lobe |          | Papillary thyroid carcinoma  | Endocr Relat Cancer (2006) 13, p497 |
| miR-143                         |                     | √        | √                                  | Normal tissue                                               |          | Cervix                       | Cancer Res (2007) 67, p6031         |
|                                 |                     | √        |                                    | Normal mucosa                                               | Paired   | Colon                        | Mol Cancer Res (2003) 1, p882       |
|                                 |                     |          | √                                  | Corresponding non-cancerous lung tissue                     | Paired   | Lung                         | Cancer Cell (2006) 9, p189          |
| miR-143b                        |                     |          | √                                  | Normal ovarian tissue                                       | Unpaired | Ovarian                      | Cancer Res (2007) 18, p8699         |
| miR-144                         |                     |          | √                                  | Normal tissue from posterior myometrium                     |          | Uterine leiomyoma            | Genes Chr Cancer (2007) 46, p336    |
| miR-145                         |                     | √        | √                                  | Normal breast tissue                                        | Unpaired | Breast                       | Cancer Res (2005) 65, p7065         |
|                                 |                     | √        | √                                  | Adjacent normal colorectal tissue                           | Paired   | Colon                        | Mol Cancer (2006) 19, p29           |
|                                 |                     | √        |                                    | Normal mucosae                                              | Paired   | Colon                        | Mol Cancer Res (2003) 1, p882       |
|                                 |                     |          | √                                  | Corresponding non-cancerous lung tissue                     | Paired   | Lung                         | Cancer Cell (2006) 9, p189          |
|                                 |                     |          | √                                  | Normal adjacent thyroid tissue                              |          | Thyroid anaplastic carcinoma | Oncogene (2007) 26, p7590           |
|                                 |                     |          | √                                  | Normal                                                      |          | Breast                       | PNAS (2006) 103, p2257              |
| miR-147                         |                     |          | √                                  | Normal ovarian tissue                                       | Unpaired | Ovarian                      | Cancer Res (2007) 18, p8699         |
| miR-148                         |                     |          | √                                  | Normal adjacent tissue or contralateral normal thyroid lobe |          | Papillary thyroid carcinoma  | Endocr Relat Cancer (2006) 13, p497 |

| microRNAs<br>(alphabetic order) | Method of detection |          |                                    | Normal control                                                    |           | Cancer Type                  | Reference                                   |
|---------------------------------|---------------------|----------|------------------------------------|-------------------------------------------------------------------|-----------|------------------------------|---------------------------------------------|
|                                 | Charaterized by     |          | Identified by<br>microRNA<br>Array | Tissue                                                            | Paired    |                              |                                             |
|                                 | PCR                 | Northern |                                    |                                                                   |           |                              |                                             |
| miR-148a                        |                     |          | √                                  | Normal tissue                                                     |           | Colon                        | Cancer Res (2007) 67, p2456                 |
| miR-148b                        |                     |          | √                                  | Adjacent non-tumorous<br>tissue                                   | Paired    | Colon                        | JAMA (2008) 299, p425                       |
| miR-149                         |                     |          | √                                  | Normal                                                            |           | Prostate                     | PNAS (2006) 103, p2257                      |
| miR-151                         |                     |          | √                                  | Normal adjacent tissue or<br>contralateral normal thyroid<br>lobe |           | Papillary thyroid carcinoma  | Endocr Relat Cancer (2006) 13, p497         |
|                                 |                     |          | √                                  | Normal adjacent thyroid<br>tissue                                 |           | Thyroid anaplastic carcinoma | Oncogene (2007) 26, p7590                   |
| miR-152                         |                     |          | √                                  | Normal                                                            |           | Pancreas                     | PNAS (2006) 103, p2257                      |
| miR-154*                        |                     |          | √                                  | Normal tissue                                                     |           | CNS                          | Cancer Res (2007) 67, p2456                 |
| miR-155                         |                     | √        | √                                  | Normal pancreas                                                   | Paired    | Pancreas                     | J Clin Oncol (2006) 24, p4677               |
|                                 |                     |          | √                                  | Normal                                                            |           | Pancreas                     | PNAS (2006) 103, p2257                      |
| miR-15a                         |                     | √        |                                    | Buccal mucosa                                                     | Paired    | Leukemia                     | PNAS (2002) 99, p15524                      |
|                                 | √                   |          | √                                  | Normal blood                                                      | Unpaired  | Leukemia                     | PNAS (2004) 101, p11755                     |
|                                 |                     | √        | √                                  | Normal blood                                                      | Unpaired  | Leukemia                     | PNAS (2005) 102, p13944                     |
|                                 |                     | √        |                                    | Normal pituitary                                                  | Unpaired  | Pituitary adenomas           | J Cell Physiol (2005) 204, p280             |
|                                 |                     |          | √                                  | Normal tissue                                                     |           | Colon                        | Cancer Res (2007) 67, p2456                 |
| miR-15b                         |                     |          | √                                  | Normal adjacent tissue or<br>contralateral normal thyroid<br>lobe |           | Papillary thyroid carcinoma  | Endocr Relat Cancer (2006) 13, p497         |
| miR-16                          |                     | √        |                                    | Buccal mucosa                                                     | Paired    | Leukemia                     | PNAS (2002) 99, p15524                      |
|                                 | √                   | √        |                                    | Normal blood                                                      | Unpaired  | Leukemia                     | PNAS (2004) 101, p11755                     |
|                                 |                     | √        | √                                  | Normal blood                                                      | Unpaired  | Leukemia                     | PNAS (2005) 102, p13944                     |
|                                 |                     | √        |                                    | Normal pituitary                                                  | Unpaired  | Pituitary adenomas           | J Cell Physiol (2005) 204, p280             |
|                                 |                     |          | √                                  | Normal                                                            |           | Breast                       | PNAS (2006) 103, p2257 [miR-16-2]           |
| miR-17-3p                       |                     |          | √                                  | Normal tissue                                                     |           | CNS                          | Cancer Res (2007) 67, p2456                 |
| miR-181a                        |                     | √        | √                                  | Normal brain                                                      | purchased | Glioblastoma                 | Biochem Biophys Res Commu (2005) 334, p1351 |
|                                 |                     |          | √                                  | Normal tissue                                                     |           | CNS                          | Cancer Res (2007) 67, p2456                 |
| miR-181b                        |                     | √        | √                                  | Normal brain                                                      | purchased | Glioblastoma                 | Biochem Biophys Res Commu (2005) 334, p1351 |
|                                 | √                   |          | √                                  | Bon marrow                                                        |           | Leukemia                     | Oncogene (2007) 14, p4148                   |
| miR-181c                        |                     | √        | √                                  | Normal brain                                                      | purchased | Glioblastoma                 | Biochem Biophys Res Commu (2005) 334, p1351 |
|                                 |                     |          | √                                  | Corresponding non-<br>cancerous lung tissue                       | Paired    | Lung                         | Cancer Cell (2006) 9, p189                  |
|                                 |                     |          | √                                  | Normal tissue                                                     |           | CNS                          | Cancer Res (2007) 67, p2456                 |
| miR-181d                        |                     |          | √                                  | Normal tissue                                                     |           | CNS                          | Cancer Res (2007) 67, p2456                 |

| microRNAs<br>(alphabetic order) | Method of detection |          |                                    | Normal control                                                    |                 | Cancer Type                  | Reference                                |
|---------------------------------|---------------------|----------|------------------------------------|-------------------------------------------------------------------|-----------------|------------------------------|------------------------------------------|
|                                 | Charaterized by     |          | Identified by<br>microRNA<br>Array | Tissue                                                            | Paired          |                              |                                          |
|                                 | PCR                 | Northern |                                    |                                                                   |                 |                              |                                          |
| miR-191                         |                     |          | √                                  | Normal tissue                                                     |                 | CNS                          | Cancer Res (2007) 67, p2456              |
| miR-192                         |                     |          | √                                  | Normal tissue                                                     |                 | CNS                          | Cancer Res (2007) 67, p2456              |
|                                 |                     |          | √                                  | Adjacent non-tumorous<br>tissue                                   | Paired          | Colon                        | JAMA (2008) 299, p425                    |
| miR-194                         |                     |          | √                                  | Normal breast tissue                                              | Unpaired        | Breast                       | Cancer Res (2005) 65, p7065              |
|                                 |                     |          | √                                  | Normal tissue                                                     |                 | CNS                          | Cancer Res (2007) 67, p2456              |
| miR-195                         |                     | √        | √                                  | Adjacent normal tissue                                            | Paired          | Hepatocellular carcinoma     | Oncogene (2006) 25, p2537                |
| miR-196b                        |                     |          | √                                  | Normal tissue                                                     |                 | Hematologic                  | Cancer Res (2007) 67, p2456              |
| miR-197                         |                     |          | √                                  | Normal tissue                                                     |                 | CNS                          | Cancer Res (2007) 67, p2456              |
|                                 |                     |          | √                                  | Normal tissue from posterior<br>myometrium                        |                 | Uterine leiomyoma            | Genes Chr Cancer (2007) 46, p336         |
| miR-198                         |                     |          | √                                  | Corresponding non-<br>cancerous lung tissue                       | Paired          | Lung                         | Cancer Cell (2006) 9, p189               |
| miR-199a                        |                     | √        | √                                  | Adjacent Normal tissue                                            | Paired          | Hepatocellular carcinoma     | Oncogene (2006) 25, p2537                |
|                                 |                     |          | √                                  | Corresponding non-<br>cancerous lung tissue                       | Paired          | Lung                         | Cancer Cell (2006) 9, p189               |
|                                 |                     |          | √                                  | Normal adjacent tissue or<br>contralateral Normal thyroid<br>lobe |                 | Papillary thyroid carcinoma  | Endocr Relat Cancer (2006) 13, p497      |
| miR-199b                        |                     |          | √                                  | Normal ovarian tissue                                             | Unpaired        | Ovarian                      | Cancer Res (2007) 18, p8699              |
| miR-200a                        |                     | √        | √                                  | Adjacent Normal tissue                                            | Paired          | Hepatocellular carcinoma     | Oncogene (2006) 25, p2537                |
| miR-203                         |                     |          | √                                  | Normal adjacent thyroid<br>tissue                                 |                 | Thyroid anaplastic carcinoma | Oncogene (2007) 26, p7590                |
| <b>miR-204</b>                  |                     |          | √                                  | <b>Normal breast tissue</b>                                       | <b>Unpaired</b> | <b>Breast</b>                | <b>Cancer Res (2005) 65, p7065</b>       |
| miR-205                         |                     |          | √                                  | Normal                                                            |                 | Breast                       | PNAS (2006) 103, p2257                   |
| miR-206                         |                     | √        | √                                  | Normal blood                                                      | Unpaired        | Leukemia                     | PNAS (2004) 101, p11755                  |
| miR-21                          | √                   |          | √                                  | Normal blood                                                      | Unpaired        | Leukemia                     | PNAS (2004) 101, p11755                  |
| miR-211                         |                     |          | √                                  | Normal ovarian tissue                                             | Unpaired        | Ovarian                      | Cancer Res (2007) 18, p8699              |
| miR-212                         | √                   | √        | √                                  | Normal tissue from posterior<br>myometrium                        |                 | Uterine leiomyoma            | Genes Chromosomes Cancer (2007) 46, p336 |
|                                 |                     |          | √                                  | Normal tissue                                                     |                 | CNS                          | Cancer Res (2007) 67, p2456              |
|                                 |                     |          | √                                  | Normal                                                            |                 | Stomach                      | PNAS (2006) 103, p2257                   |
| miR-213                         |                     |          | √                                  | Normal tissue                                                     |                 | CNS                          | Cancer Res (2007) 67, p2456              |
| miR-214                         |                     |          | √                                  | Normal ovarian tissue                                             | Unpaired        | Ovarian                      | Cancer Res (2007) 18, p8699              |
|                                 |                     |          | √                                  | Normal tissue                                                     |                 | Colon                        | Cancer Res (2007) 67, p2456              |
| miR-215                         |                     |          | √                                  | Adjacent non-tumorous<br>tissue                                   | Paired          | Colon                        | JAMA (2008) 299, p425                    |
| miR-216                         |                     |          | √                                  | Corresponding non-<br>cancerous lung tissue                       | Paired          | Lung                         | Cancer Cell (2006) 9, p189               |

| microRNAs<br>(alphabetic order) | Method of detection |          |                                    | Normal control                          |          | Cancer Type                   | Reference                                |
|---------------------------------|---------------------|----------|------------------------------------|-----------------------------------------|----------|-------------------------------|------------------------------------------|
|                                 | Charaterized by     |          | Identified by<br>microRNA<br>Array | Tissue                                  | Paired   |                               |                                          |
|                                 | PCR                 | Northern |                                    |                                         |          |                               |                                          |
| miR-218                         |                     |          | √                                  | Corresponding non-cancerous lung tissue | Paired   | Lung                          | Cancer Cell (2006) 9, p189               |
|                                 |                     |          | √                                  | Normal                                  |          | Prostate                      | PNAS (2006) 103, p2257 [miR-218-2]       |
|                                 |                     |          | √                                  | Normal                                  |          | Stomach                       | PNAS (2006) 103, p2257 [miR-218-2]       |
| miR-219                         |                     |          | √                                  | Corresponding non-cancerous lung tissue | Paired   | Lung                          | Cancer Cell (2006) 9, p189               |
|                                 |                     |          | √                                  | Normal tissue                           |          | CNS                           | Cancer Res (2007) 67, p2456              |
|                                 |                     |          | √                                  | Adjacent normal thyroid tissue          | Paired   | Papillary thyroid carcinoma   | PNAS (2005) 102, p19075 [miR-219-1]      |
| miR-220                         |                     |          | √                                  | Corresponding non-cancerous lung tissue | Paired   | Lung                          | Cancer Cell (2006) 9, p189               |
| miR-223                         |                     | √        | √                                  | Normal blood                            | Unpaired | Leukemia                      | PNAS (2004) 101, p11755                  |
|                                 | √                   | √        | √                                  | Normal bone marrow control              |          | Leukemia                      | PNAS (2007) 11, p19971                   |
| miR-224                         |                     |          | √                                  | Corresponding non-cancerous lung tissue | Paired   | Lung                          | Cancer Cell (2006) 9, p189               |
|                                 |                     |          | √                                  | Normal ovarian tissue                   | Unpaired | Ovarian                       | Cancer Res (2007) 18, p8699              |
|                                 |                     |          | √                                  | Normal adjacent thyroid tissue          |          | Thyroid anaplastic carcinoma  | Oncogene (2007) 26, p7590                |
|                                 |                     |          | √                                  | Normal                                  |          | Breast                        | PNAS (2006) 103, p2257                   |
| miR-24                          |                     |          | √                                  | Normal                                  |          | Prostate                      | PNAS (2006) 103, p2257 [miR-24-1]        |
| miR-25                          |                     |          | √                                  | Normal adjacent thyroid tissue          |          | Thyroid anaplastic carcinoma  | Oncogene (2007) 26, p7590                |
| miR-26a                         |                     | √        |                                    | Normal blood                            | Unpaired | Leukemia                      | PNAS (2004) 101, p11755                  |
|                                 | √                   |          | √                                  | Normal adjacent thyroid tissue          |          | Thyroid anaplastic carcinomas | Oncogene (2007) 26, p7590                |
|                                 |                     |          | √                                  | Corresponding non-cancerous lung tissue | Paired   | Lung                          | Cancer Cell (2006) 9, p189               |
|                                 |                     |          | √                                  | Adjacent normal thyroid tissue          | Paired   | Papillary thyroid carcinoma   | PNAS (2005) 102, p19075 [miR-26a-1]      |
| miR-26b                         |                     |          | √                                  | Normal tissue                           |          | CNS                           | Cancer Res (2007) 67, p2456              |
| miR-27b                         |                     |          | √                                  | Corresponding non-cancerous lung tissue | Paired   | Lung                          | Cancer Cell (2006) 9, p189               |
| miR-28                          |                     |          | √                                  | Normal tissue                           |          | Hematologic                   | Cancer Res (2007) 67, p2456              |
| miR-29b                         | √                   |          | √                                  | Normal tissue from posterior myometrium |          | Uterine leiomyoma             | Genes Chromosomes Cancer (2007) 46, p336 |
|                                 |                     |          | √                                  | corresponding non-cancerous lung tissue | Paired   | Lung                          | Cancer Cell (2006) 9, p189               |

| microRNAs<br>(alphabetic order) | Method of detection |          |                                    | Normal control                          |          | Cancer Type                   | Reference                                |
|---------------------------------|---------------------|----------|------------------------------------|-----------------------------------------|----------|-------------------------------|------------------------------------------|
|                                 | Charaterized by     |          | Identified by<br>microRNA<br>Array | Tissue                                  | Paired   |                               |                                          |
|                                 | PCR                 | Northern |                                    |                                         |          |                               |                                          |
|                                 |                     |          | √                                  | Normal adjacent thyroid tissue          |          | Thyroid anaplastic carcinoma  | Oncogene (2007) 26, p7590                |
| miR-301                         |                     |          | √                                  | Adjacent non-tumorous tissue            | Paired   | Colon                         | JAMA (2008) 299, p425                    |
| miR-30a-3p                      |                     |          | √                                  | Adjacent non-tumorous tissue            | Paired   | Colon                         | JAMA (2008) 299, p425                    |
| miR-30a-5p                      | √                   |          | √                                  | Normal adjacent thyroid tissue          |          | Thyroid anaplastic carcinomas | Oncogene (2007) 26, p7590                |
|                                 |                     |          | √                                  | Corresponding non-cancerous lung tissue | Paired   | Lung                          | Cancer Cell (2006) 9, p189               |
|                                 |                     |          | √                                  | Normal                                  |          | Lung                          | PNAS (2006) 103, p2257                   |
| miR-30b                         |                     |          | √                                  | Normal tissue                           |          | CNS                           | Cancer Res (2007) 67, p2456              |
| miR-30c                         |                     |          | √                                  | Normal tissue                           |          | CNS                           | Cancer Res (2007) 67, p2456              |
|                                 |                     |          | √                                  | Normal                                  |          | Breast                        | PNAS (2006) 103, p2257                   |
| miR-30d                         | √                   |          | √                                  | Normal blood                            | Unpaired | Leukemia                      | PNAS (2004) 101, p11755                  |
|                                 | √                   |          | √                                  | Normal adjacent thyroid tissue          |          | Thyroid anaplastic carcinomas | Oncogene (2007) 26, p7590                |
|                                 |                     |          | √                                  | Normal tissue                           |          | CNS                           | Cancer Res (2007) 67, p2456              |
|                                 |                     |          | √                                  | Normal                                  |          | Lung                          | PNAS (2006) 103, p2257                   |
| miR-32                          |                     | √        | √                                  | Normal tissue from posterior myometrium |          | Uterine leiomyoma             | Genes Chromosomes Cancer (2007) 46, p336 |
|                                 |                     |          | √                                  | Corresponding non-cancerous lung tissue | Paired   | Lung                          | Cancer Cell (2006) 9, p189               |
|                                 |                     |          | √                                  | Normal adjacent thyroid tissue          |          | Thyroid anaplastic carcinoma  | Oncogene (2007) 26, p7590                |
| miR-320                         |                     |          | √                                  | Nonmalignant cholangiocytes             |          | Cholangiocarcinoma            | Gastroenterology (2006) 130, p2113       |
|                                 |                     |          | √                                  | Nonmalignant cholangiocytes             |          | Cholangiocarcinoma            | Gastroenterology (2006) 130, p2113       |
| miR-321                         |                     |          | √                                  | Normal tissue                           |          | CNS                           | Cancer Res (2007) 67, p2456              |
| miR-323                         |                     |          | √                                  | Normal tissue                           |          | CNS                           | Cancer Res (2007) 67, p2456              |
| miR-324-3p                      |                     |          | √                                  | Normal tissue                           |          | CNS                           | Cancer Res (2007) 67, p2456              |
| miR-324-5p                      |                     |          | √                                  | Normal tissue                           |          | CNS                           | Cancer Res (2007) 67, p2456              |
|                                 |                     |          | √                                  | Adjacent non-tumorous tissue            | Paired   | Colon                         | JAMA (2008) 299, p425                    |
| miR-326                         |                     |          | √                                  | Normal pancreas                         | Paired   | Pancreas                      | J Clin Oncol (2006) 24, p4677            |
| miR-328                         |                     |          | √                                  | Normal tissue                           |          | CNS                           | Cancer Res (2007) 67, p2456              |
| miR-33                          |                     |          | √                                  | Corresponding non-cancerous lung tissue | Paired   | Lung                          | Cancer Cell (2006) 9, p189               |

| microRNAs<br>(alphabetic order) | Method of detection |          |                                    | Normal control                              |          | Cancer Type                  | Reference                         |
|---------------------------------|---------------------|----------|------------------------------------|---------------------------------------------|----------|------------------------------|-----------------------------------|
|                                 | Charaterized by     |          | Identified by<br>microRNA<br>Array | Tissue                                      | Paired   |                              |                                   |
|                                 | PCR                 | Northern |                                    |                                             |          |                              |                                   |
| miR-330                         |                     |          | √                                  | Normal tissue                               |          | CNS                          | Cancer Res (2007) 67, p2456       |
| miR-331                         |                     |          | √                                  | Normal tissue                               |          | CNS                          | Cancer Res (2007) 67, p2456       |
|                                 |                     |          | √                                  | Adjacent non-tumorous<br>tissue             | Paired   | Colon                        | JAMA (2008) 299, p425             |
| miR-338                         |                     |          | √                                  | Normal tissue                               |          | CNS                          | Cancer Res (2007) 67, p2456       |
| miR-339                         |                     |          | √                                  | Normal pancreas                             | Paired   | Pancreas                     | J Clin Oncol (2006) 24, p4677     |
| miR-33b                         |                     |          | √                                  | Normal                                      |          | Stomach                      | PNAS (2006) 103, p2257            |
| miR-342                         |                     |          | √                                  | Adjacent non-tumorous<br>tissue             | Paired   | Colon                        | JAMA (2008) 299, p425             |
| miR-345                         |                     |          | √                                  | Normal tissue                               |          | CNS                          | Cancer Res (2007) 67, p2456       |
|                                 |                     |          | √                                  | Adjacent Normal thyroid<br>tissue           | Paired   | Papillary thyroid carcinoma  | PNAS (2005) 102, p19075           |
| miR-346                         |                     |          | √                                  | Normal tissue                               |          | CNS                          | Cancer Res (2007) 67, p2456       |
| miR-34a                         | √                   |          |                                    | Normal adrenal tissue                       |          | Neuroblastoma                | Oncogene (2007) 26, p5017         |
|                                 |                     |          | √                                  | Normal tissue                               |          | CNS                          | Cancer Res (2007) 67, p2456       |
| miR-34b                         |                     |          | √                                  | Adjacent non-tumorous<br>tissue             | Paired   | Colon                        | JAMA (2008) 299, p425             |
| miR-34c                         |                     |          | √                                  | Adjacent non-tumorous<br>tissue             | Paired   | Colon                        | JAMA (2008) 299, p425             |
| miR-361                         |                     |          | √                                  | Normal tissue                               |          | CNS                          | Cancer Res (2007) 67, p2456       |
| miR-370                         |                     |          | √                                  | Normal tissue                               |          | CNS                          | Cancer Res (2007) 67, p2456       |
| miR-374                         |                     |          | √                                  | Normal ovarian tissue                       | Unpaired | Ovarian                      | Cancer Res (2007) 18, p8699       |
| miR-378                         |                     |          | √                                  | Normal tissue                               |          | Colon                        | Cancer Res (2007) 67, p2456       |
| miR-424                         |                     |          | √                                  | Normal tissue                               |          | Colon                        | Cancer Res (2007) 67, p2456       |
| miR-425                         |                     |          | √                                  | Normal tissue                               |          | CNS                          | Cancer Res (2007) 67, p2456       |
| miR-9                           |                     |          | √                                  | Corresponding non-<br>cancerous lung tissue | Paired   | Lung                         | Cancer Cell (2006) 9, p189        |
|                                 |                     |          | √                                  | Normal ovarian tissue                       | Unpaired | Ovarian                      | Cancer Res (2007) 18, p8699       |
|                                 |                     |          | √                                  | Adjacent normal thyroid<br>tissue           | Paired   | Papillary thyroid carcinoma  | PNAS (2005) 102, p19075 [miR-9-3] |
|                                 |                     |          | √                                  | Normal                                      |          | Colon                        | PNAS (2006) 103, p2257 [miR-9-3]  |
| miR-92                          |                     |          | √                                  | Normal adjacent thyroid<br>tissue           |          | Thyroid anaplastic carcinoma | Oncogene (2007) 26, p7590         |
| miR-95                          |                     |          | √                                  | Corresponding non-<br>cancerous lung tissue | Paired   | Lung                         | Cancer Cell (2006) 9, p189        |
| miR-96                          |                     |          | √                                  | Normal                                      |          | Stomach                      | PNAS (2006) 103, p2257            |
| miR-98                          |                     |          | √                                  | Normal tissue                               |          | CNS                          | Cancer Res (2007) 67, p2456       |
| miR-99                          |                     |          | √                                  | Normal ovarian tissue                       | Unpaired | Ovarian                      | Cancer Res (2007) 18, p8699       |

| microRNAs<br>(alphabetic order) | Method of detection |          |                                    | Normal control                    |        | Cancer Type                  | Reference                   |
|---------------------------------|---------------------|----------|------------------------------------|-----------------------------------|--------|------------------------------|-----------------------------|
|                                 | Charaterized by     |          | Identified by<br>microRNA<br>Array | Tissue                            | Paired |                              |                             |
|                                 | PCR                 | Northern |                                    |                                   |        |                              |                             |
| miR-99a                         |                     |          | √                                  | Normal adjacent thyroid<br>tissue |        | Thyroid anaplastic carcinoma | Oncogene (2007) 26, p7590   |
| mR-422a                         |                     |          | √                                  | Normal tissue                     |        | Colon                        | Cancer Res (2007) 67, p2456 |

**Supporting Table 5. Summary of clinical features of 10 low passages HNSCC cell lines established from human HNSCC tumors with persistent disease or local failure after treatment (related to Figure 1C, Figure 2 and Figure 4).** (Ref: Brachman, DG et al., Cancer Res. 52: 4832-4836, 1992).

LF: local failure and all died of the disease; NED: no evidence of disease; Outcome: interval since treatment initiation.

| <b>Tumor</b> | <b>Primary site</b> | <b>TNM stage</b> | <b>Outcome</b> |
|--------------|---------------------|------------------|----------------|
| SCC25        | Floor of mounth     | T2N1M0           | persistent     |
| SCC35        | Pyriform sinus      | T4N0M0           | LF, 25mo       |
| SCC58        | Base of tongue      | T4N2bM0          | NED            |
| SCC61        | Oral tongue         | T4N2bM0          | persistent     |
| Nu61         | Derived from SCC61  | N/A              | N/A            |
| SCC135       | Hard palate         | T1N0M0           | LF, 6mo        |
| SCC151       | Oral tongue         | T3N0M0           | LF, 3mo        |
| SQ20B        | Larynx              | T2N0M0           | LF, 4mo        |
| SQ38         | Pyriform sinus      | T2N0M0           | LF, 7mo        |
| JSQ3         | Nasal vestibule     | T3N0M0           | LF, 4mo        |



**Supporting Table 6. Microarray analysis of mRNA expression status of 34 predicted miR-204 targets in GSE6631 (related to Figure 2A).** Intersection of 1,088 putative gene targeted by miR-204 in the miRNome with 382 differentially upregulated mRNA transcripts in GSE6631 microarray yielded 34 predicted miR-204 targets associated with malignant transformation in HNSCC. False discovery rate (FDR) was derived from significant analysis of microarrays (SAM) (**Methods**).

| Gene symbol | Gene name                                                | Fold Change | FDR * |
|-------------|----------------------------------------------------------|-------------|-------|
| ARPC1B      | actin related protein 2/3 complex, subunit 1B            | 2.89        | 0     |
| ATP2B1      | ATPase, Ca <sup>++</sup> transporting, plasma membrane 1 | 2.54        | 0     |
| AURKB       | aurora kinase B                                          | 4.29        | 0     |
| BIRC2       | baculoviral IAP repeat-containing 2                      | 2.91        | 0.060 |
| BMP1        | bone morphogenetic protein 1                             | 3.03        | 0     |
| CBX1        | chromobox homolog 1                                      | 2.13        | 0     |
| CDC25B      | cell division cycle 25 homolog B                         | 3.76        | 0     |
| CDH11       | cadherin 11, type 2, OB-cadherin                         | 6.81        | 0     |
| CHST2       | carbohydrate sulfotransferase 2                          | 4.21        | 0     |
| CTSC        | cathepsin C                                              | 5.30        | 0     |
| EFNB1       | ephrin-B1                                                | 2.54        | 0     |
| ERF         | Ets2 repressor factor                                    | 2.15        | 0     |
| FAP         | fibroblast activation protein, alpha                     | 24.84       | 0     |
| FBN2        | fibrillin 2                                              | 5.05        | 0     |
| GPX7        | glutathione peroxidase 7                                 | 2.24        | 0.060 |
| HMGA2       | high mobility group AT-hook 2                            | 2.18        | 0     |
| HOXB7       | homeobox B7                                              | 2.56        | 0     |
| IGF2BP3     | insulin-like growth factor 2 mRNA binding protein 3      | 6.92        | 0     |
| INHBA       | inhibin, beta A                                          | 2.24        | 0     |
| ITGB4       | integrin, beta 4                                         | 4.57        | 0     |
| KLHDC3      | kelch domain containing 3                                | 3.50        | 0     |
| LTBP1       | latent transforming growth factor beta binding protein 1 | 5.71        | 0     |
| MMP3        | matrix metalloproteinase 3                               | 13.46       | 0     |
| MMP9        | matrix metalloproteinase 9                               | 16.04       | 0     |
| MRPS12      | mitochondrial ribosomal protein S12                      | 2.20        | 0     |
| MYO10       | myosin X                                                 | 3.64        | 0     |
| NCDN        | neurochondrin                                            | 2.40        | 0.060 |
| NUAK1       | NUAK family, SNF1-like kinase, 1                         | 2.85        | 0     |
| PRAME       | preferentially expressed antigen in melanoma             | 2.47        | 0.060 |
| PTDSS1      | phosphatidylserine synthase 1                            | 2.04        | 0     |
| SHC1        | SHC transforming protein 1                               | 2.36        | 0     |
| SLC12A4     | solute carrier family 12, member 4                       | 2.58        | 0     |
| SOX4        | SRY-box 4                                                | 3.38        | 0     |
| SPARC       | secreted protein, acidic, cysteine-rich                  | 6.77        | 0     |

**Supporting Table 7. Functional analysis of predicted HNSCC miR-204 targets by Gene Ontology (Methods, Figures 2B-C, 3C, and S8).** To provide insights into biological functions and processes potentially regulated by miR-204 in HNSCC, we conducted statistical analyses based on the functional assignments of genes in Gene Ontology (GO) to infer deregulated functions associated with altered miR-204 expression in the miRNOME as well as in the HNSCC. Statistical enrichment of specific “Molecular functions” and “Biological processes” found in GO was calculated within the 1088 total putative targets in the miRNOME (**Methods**). Except KLHDC3 and NCDN, other 32 of the 34 predicted miR-204 targets are functionally related. We chose to further characterize the expression of the miR-204 targets in the 5 GO functional modules (highlighted in yellow) in HNSCC tumors (**Figure 2B**) and cell lines (**Figures 2C**). \* Double enrichment (**Methods**)

|                      | GO ID      | GO function description                      | Double enrichment* |          |                   | HNSCC miR-204 targets in GO modules                                               |
|----------------------|------------|----------------------------------------------|--------------------|----------|-------------------|-----------------------------------------------------------------------------------|
|                      |            |                                              | Genes (#)          | <i>P</i> | Adjusted <i>P</i> |                                                                                   |
| Biological processes | GO:0006508 | proteolysis                                  | 5                  | 5.89E-04 | 3.88E-03          | BMP1,CTSC,FAP,MMP3,MMP9                                                           |
|                      | GO:0006412 | translation                                  | 3                  | 2.96E-03 | 9.18E-03          | IGF2BP3,INHBA,MRPS12                                                              |
|                      | GO:0022402 | cell cycle process                           | 5                  | 1.05E-02 | 2.18E-02          | AURKB,CDC25B,ERF,INHBA,SHC1                                                       |
|                      | GO:0022403 | cell cycle phase                             | 4                  | 7.98E-04 | 4.20E-03          | AURKB,CDC25B,SHC1, INHBA                                                          |
|                      | GO:0000074 | regulation of progression through cell cycle | 4                  | 1.40E-02 | 2.60E-02          | CDC25B,ERF,INHBA,SHC1                                                             |
|                      | GO:0032501 | multicellular organismal process             | 13                 | 6.47E-03 | 1.59E-02          | SPARC,MMP3,ITGB4,INHBA,HOXB7,HMGA2,FBN2,EFNB1,CHST2,CDH11,BMP1,BIRC2              |
|                      | GO:0032502 | developmental process                        | 14                 | 2.90E-03 | 9.18E-03          | BIRC2,BMP1,CDH11,CHST2,EFNB1,FBN2,HMGA2,HOXB7,IGF2BP3,INHBA,ITGB4,MMP9,SHC1,SPARC |
|                      | GO:0009653 | anatomical structure morphogenesis           | 6                  | 6.58E-03 | 1.61E-02          | BIRC2,EFNB1,FBN2,IGF2BP3,INHBA,SHC1                                               |
|                      | GO:0000902 | cell morphogenesis                           | 3                  | 1.12E-02 | 2.25E-02          | EFNB1,SHC1,INHBA                                                                  |
|                      | GO:0048856 | anatomical structure development             | 10                 | 2.94E-03 | 9.18E-03          | BIRC2,FBN2,IGF2BP3                                                                |
|                      | GO:0009888 | tissue development                           | 3                  | 1.28E-03 | 5.78E-03          | BMP1,CDH11,SPARC                                                                  |
|                      | GO:0048513 | organ development                            | 6                  | 1.21E-02 | 2.36E-02          | BMP1,CDH11,SPARC,MMP9,INHBA,BIRC2                                                 |
|                      | GO:0048731 | system development                           | 7                  | 2.39E-02 | 3.97E-02          | BIRC2,BMP1,CDH11,EFNB1,INHBA,MMP9,SPARC                                           |
|                      | GO:0048522 | positive regulation of cellular process      | 6                  | 3.52E-03 | 1.06E-02          | CDC25B,EFNB1,INHBA,BIRC2,MMP9,SHC1                                                |
|                      | GO:0008284 | positive regulation of cell proliferation    | 3                  | 5.76E-04 | 3.87E-03          | CDC25B,EFNB1,SHC1                                                                 |
|                      | GO:0022610 | biological adhesion                          | 5                  | 1.95E-03 | 8.36E-03          | ARPC1B,ITGB4,EFNB1,BMP1,CDH11                                                     |
|                      | GO:0007155 | cell adhesion                                | 5                  | 1.95E-03 | 8.36E-03          | ARPC1B,ITGB4,EFNB1,BMP1,CDH11                                                     |
|                      | GO:0032989 | cellular structure morphogenesis             | 3                  | 1.12E-02 | 2.25E-02          | EFNB1,INHBA,SHC1                                                                  |

|                     | GO ID      | GO function description                          | Double enrichment* |          |            | HNSCC miR-204 targets in GO modules                                                                                                   |
|---------------------|------------|--------------------------------------------------|--------------------|----------|------------|---------------------------------------------------------------------------------------------------------------------------------------|
|                     |            |                                                  | Genes (#)          | P        | Adjusted P |                                                                                                                                       |
|                     | GO:0007167 | enzyme linked receptor protein signaling pathway | 3                  | 2.96E-03 | 9.18E-03   | SPARC,SHC1,INHBA                                                                                                                      |
|                     | GO:0008283 | cell proliferation                               | 4                  | 8.04E-03 | 1.81E-02   | SHC1,CDC25B,EFNB1,ERF                                                                                                                 |
|                     | GO:0002376 | immune system process                            | 4                  | 1.65E-02 | 2.99E-02   | INHBA,MMP9,CTSC,EFNB1                                                                                                                 |
| Molecular functions | GO:0003824 | catalytic activity                               | 13                 | 2.77E-02 | 4.35E-02   | ATP2B1,AURKB,BMP1,CDC25B,CHST2,CTSC,FAP,GPX7,LTBP1,MMP3,MMP9,NUAK1,PTDSS1                                                             |
|                     | GO:0004674 | protein serine/threonine kinase activity         | 3                  | 1.56E-02 | 2.83E-02   | AURKB,NUAK1,LTBP1                                                                                                                     |
|                     | GO:0016787 | hydrolase activity                               | 7                  | 2.18E-02 | 3.65E-02   | ATP2B1,BMP1,CDC25B,CTSC,FAP,MMP3,MMP9                                                                                                 |
|                     | GO:0008233 | peptidase activity                               | 5                  | 1.43E-04 | 6.22E-04   | BMP1,CTSC,FAP,MMP3,MMP9                                                                                                               |
|                     | GO:0004175 | endopeptidase activity                           | 5                  | 1.42E-05 | 6.79E-05   | BMP1,CTSC,FAP,MMP3,MMP9                                                                                                               |
|                     | GO:0043167 | ion binding                                      | 13                 | 1.67E-02 | 2.99E-02   | ATP2B1,AURKB,BIRC2,BMP1,CDH11,CTSC,FBN2,LTBP1,MMP3,MMP9,NUAK1,SLC12A4,SPAR                                                            |
|                     | GO:0005515 | protein binding                                  | 23                 | 5.97E-04 | 2.44E-03   | ARPC1B,ATP2B1,AURKB,BIRC2,BMP1,CBX1,CDC25B,CDH11,EFNB1,ERF,FAP,HMGA2,HOXB7,INHBA,ITGB4,LTBP1,MMP9,MRPS12,MYO10,NUAK1,PRAME,SHC1,SPARC |
|                     | GO:0005102 | receptor binding                                 | 4                  | 6.54E-03 | 1.51E-02   | BMP1,EFNB1,INHBA,SHC1                                                                                                                 |
|                     | GO:0005198 | structural molecule activity                     | 3                  | 1.12E-02 | 2.25E-02   | ARPC1B,FBN2,MRPS12                                                                                                                    |

**Supporting Table 8. Description of the 3'-UTR binding sites of 34 predicted mRNA targets of miR-204 in the upregulated gene expression set of GSE6631.** We examined the sequence alignment between the miR-204 and the 3'-UTR region of these gene targets, and ranked them according to (i) the count of databases in which they were predicted, (ii) the number of binding sites present, and (iii) the prediction score and the free energy score. While all 34 genes contain at least one miR-204 binding site, the top 10 ranked genes have multiple sites. These observations describe how miR-204 may directly regulate the expression of all 34 predicted targets.

| Gene Symbol | PicTar (kcal/mol) | TargetScan Score | miRanda (kcal/mol) | miRBase energy | 3' UTR alignment                 | The Num. of binding sites |
|-------------|-------------------|------------------|--------------------|----------------|----------------------------------|---------------------------|
| MYO10       | -16.5             | -0.3             | -18.3              | -              | 5' -UGAGCAUUAAAAAGCAAAGGGAA-3'   | 3                         |
|             |                   |                  |                    |                |                                  | (PicTar)                  |
|             |                   |                  |                    |                | 3' - UCCGUAUCCUACUGUUUCCCUU-5'   |                           |
| ATP2B1      | -31.8             | -0.33            | -                  | -              | 5' ---CAUAGGGAAUAGAGAAAAGGGAA-3' | 6                         |
|             |                   |                  |                    |                |                                  | (PicTar)                  |
|             |                   |                  |                    |                | 3' UCCGUAUCCUACUG---UUUCCCUU-5'  |                           |
| HMGA2       | -17.4             | -0.39            | -                  | -              | 5' ---AUGUUCAUUUUCAA-AAAGGGAA-3' | 5                         |
|             |                   |                  |                    |                |                                  | (PicTar)                  |
|             |                   |                  |                    |                | 3' ----UCCGUAUCCUACUGUUUCCCUU-5' |                           |
| SOX4        | -20.5             | -0.66            | -                  | -              | 5' -GUGCAAUUACAGCAAAAAGGGAU-3'   | 5                         |
|             |                   |                  |                    |                |                                  | (PicTar)                  |
|             |                   |                  |                    |                | 3' -UCCGUAUCCUACUG-UUUCCCUU-5'   |                           |
| CDH11       | -21.4             | -0.15            | -                  | -              | 5' -GCUGAACUGACAUAAGGGAAA-3'     | 4                         |
|             |                   |                  |                    |                |                                  | (PicTar)                  |
|             |                   |                  |                    |                | 3' -UCCGUAUCCUACUGUUUCCCUU-5'    |                           |
| SHC1        | -20.4             | -0.37            | -                  | -              | 5' -GGUCUCACUUUAACCAAAGGGAA-3'   | 4                         |
|             |                   |                  |                    |                |                                  | (PicTar)                  |
|             |                   |                  |                    |                | 3' -_UCCGUAUCCUACUGUUUCCCUU-5'   |                           |
| FBN2        | -17.4             | -0.61            | -                  | -              | 5' -AAACUAUGUAAAACAAAAGGGAA...3' | 3                         |
|             |                   |                  |                    |                |                                  | (PicTar)                  |
|             |                   |                  |                    |                | 3' UCCGUAUCCUACUG--UUUCCCUU-5'   |                           |
| IGF2BP3     | -15.7             | -0.03            | -                  | -              | 5' -UAACAUGAGUAACCU-AAGGGAAG-3'  | 3                         |
|             |                   |                  |                    |                |                                  | (PicTar)                  |
|             |                   |                  |                    |                | 3' -- UCCGUAUCCUACUGUUUCCCUU-5'  |                           |
| SPARC       | -22.7             | -                | -                  | -25.5          | 5' -taaatTAGGAAGACAAAAGGGAA-3'   | 2                         |
|             |                   |                  |                    |                |                                  | (PicTar)                  |
|             |                   |                  |                    |                | 3' -uccguAUCCUACUGUUUCCCUU-5'    |                           |
| CDC25B      | -15.4             | -0.05            | -                  | -              | 5' -GUUUUGUUGCCCCAGAAAAGGGAU-3'  | 2                         |
|             |                   |                  |                    |                |                                  | (PicTar)                  |
|             |                   |                  |                    |                | 3' -_UCCGUAUCCUACUGUUUCCCUU-5'   |                           |
| NUAK1       | -                 | -                | -11.36             | -              | 5' -tGGC-TACCACGGGAAAGGGAA-3'    | 4                         |
|             |                   |                  |                    |                | :                                | (miRnada)                 |
|             |                   |                  |                    |                | 3' -uCCGUAUCCUACUGUUUCCCUU-5'    |                           |
| NCDN        | -28.9             | -                | -                  | -              | 5' -accCAGGGCGGGCAGAGGGAA-3'     | 2                         |
|             |                   |                  |                    |                | :    :   :                       | (PicTar)                  |

| Gene Symbol    | PicTar (kcal/mol) | TargetScan Score | miRanda (kcal/mol) | miRBase energy | 3' UTR alignment                           | The Num. of binding sites |
|----------------|-------------------|------------------|--------------------|----------------|--------------------------------------------|---------------------------|
|                |                   |                  |                    |                | 3'-uccGUAUCCUACUG--UUUCCCUU-5'             |                           |
| <b>PRAME</b>   | -                 | -                | -                  | -18.83         | 5'-tcagtgAGGAAAAAAGGGGAA-3'                | 2                         |
|                |                   |                  |                    |                | :                                          | (miRBase)                 |
|                |                   |                  |                    |                | 3'-uccguaUCCUACUGUUUCCCUU-5'               |                           |
| <b>CBX1</b>    | -                 | -                | -17.6              | -              | 5'-tccCAGTGGAGGGGAAAGGGGA-3'               | 2                         |
|                |                   |                  |                    |                | ...      .     .   :             :         | (miRnada)                 |
|                |                   |                  |                    |                | 3'-uccGUAUCCUACUGUUUCCCUU-5'               |                           |
| <b>ERF</b>     | -                 | -                | -                  | -30.05         | 5'-GGGCAAAGTGGTGGTAGGGGAG-3'               | 1                         |
|                |                   |                  |                    |                | :                :   :   :   :   :       : | (miRBase)                 |
|                |                   |                  |                    |                | 3'-UCCGUAUC-CUACUGUUUCCCUU-5'              |                           |
| <b>INHBA</b>   | -                 | -                | -                  | -25.64         | 5'-AGGAATTGGGAGGGAAAGGGAG-3'               | 1                         |
|                |                   |                  |                    |                | :   :             :                        | (miRBase)                 |
|                |                   |                  |                    |                | 3'-UCCGUAUCCUACUGUUUCCCUU-5'               |                           |
| <b>CHST2</b>   | -                 | -                | -                  | -24.7          | 5'-GGGTGGGGTGGAGAAAGGGGA-3'                | 1                         |
|                |                   |                  |                    |                | :     : : :                 :              | (miRBase)                 |
|                |                   |                  |                    |                | 3'-UCCGUAUCCUACUGUUUCCCUU-5'               |                           |
| <b>AURKB</b>   | -                 | -                | -                  | -22.16         | 5'-ATGTATAGGGGAAAGAAGGGGA-3'               | 1                         |
|                |                   |                  |                    |                | :         :   :                            | (miRBase)                 |
|                |                   |                  |                    |                | 3'-UCCGUAUCCUACUGUUUCCCUU-5'               |                           |
| <b>HOXB7</b>   | -                 | -                | -                  | -22.09         | 5'-AGGAAGAGACATGAGAAAGGGAG-3'              | 1                         |
|                |                   |                  |                    |                | :                                          | (miRBase)                 |
|                |                   |                  |                    |                | 3'-UCCGUAUC-CUACUGUUUCCCUU-5'              |                           |
| <b>SLC12A4</b> | -                 | -                | -                  | -22.03         | 5'-cacCATCAGA-GACGAAGGGAA-3'               | 1                         |
|                |                   |                  |                    |                | :                                          | (miRBase)                 |
|                |                   |                  |                    |                | 3'-UCCGUAUCCUACUGUUUCCCUU-5'               |                           |
| <b>MRPS12</b>  | -                 | -                | -                  | -20.42         | 5'-AGTCTGGGGGTGCAAAGGGtg-3'                | 1                         |
|                |                   |                  |                    |                | :     : :                                  | (miRBase)                 |
|                |                   |                  |                    |                | 3'-UCCGUAUCCUACUGUUUCCCUU-5'               |                           |
| <b>PTDSS1</b>  | -                 | -                | -                  | -19.6          | 5'-CAGCGCGGTGTGTTGAAGGGAA-3'               | 1                         |
|                |                   |                  |                    |                | : :   :   : :                              | (miRBase)                 |
|                |                   |                  |                    |                | 3'-UCCGUAUCCUACUGUUUCCCUU-5'               |                           |
| <b>ITGB4</b>   | -                 | -                | -                  | -19.48         | 5'-TCTCTGGGAGGCATGAAGGGGG-3'               | 1                         |
|                |                   |                  |                    |                | :             :   :           : :          | (miRBase)                 |
|                |                   |                  |                    |                | 3'-UCCGUAUCCUAC-UGUUUCCCUU-5'              |                           |
| <b>KLHDC3</b>  | -                 | -                | -                  | -19.47         | 5'-TCTGCTGGGAAGG-GAAGGGAA-3'               | 1                         |
|                |                   |                  |                    |                | :         : :                              | (miRBase)                 |
|                |                   |                  |                    |                | 3'-UCCGUAUCCUACUGUUUCCCUU-5'               |                           |
| <b>GPX7</b>    | -                 | -                | -                  | -18.53         | 5'-tcaaATGGTGCTTCAAAGGGAG-3'               | 1                         |
|                |                   |                  |                    |                | :   :             :                        | (miRBase)                 |
|                |                   |                  |                    |                | 3'-uccgUAUCCUACUGUUUCCCUU-5'               |                           |
| <b>CTSC</b>    | -                 | -                | -                  | -18.02         | 5'-ucCGUAUCCUACUGUUUCCCUU-3'               | 1                         |
|                |                   |                  |                    |                | :                                          | (miRBase)                 |
|                |                   |                  |                    |                | 3'-ctGCATCAGTTGTAAAGGGGAA-5'               |                           |
| <b>LTBP1</b>   | -                 | -                | -16.5              | -              | 5'-GU-GUAAAGGA-----AAAGGGAG-3'             | 1                         |
|                |                   |                  |                    |                | :   :                     :                | (miRnada)                 |

| Gene Symbol   | PicTar (kcal/mol) | TargetScan Score | miRanda (kcal/mol) | miRBase energy | 3' UTR alignment                                                      | The Num. of binding sites |
|---------------|-------------------|------------------|--------------------|----------------|-----------------------------------------------------------------------|---------------------------|
|               |                   |                  |                    |                | 3'-UC.CGUAUCCUACUG.UUUCCCUU-5'                                        |                           |
| <b>MMP9</b>   | -                 | -                | -                  | -15.15         | 5'-ttctgttcttgaggAAAGGGAG-3'                                          | 1                         |
|               |                   |                  |                    |                | :<br>3'-uccguauccuacugUUUCCCUU-5'                                     | (miRBase)                 |
| <b>MMP3</b>   | -                 | -                | -                  | -14.15         | 5'-atctttcccAAGAGAAGGGAA-3'                                           | 1                         |
|               |                   |                  |                    |                | :          <br>3'-uccguauccUACUGUUUCCCUU-5'                           | (miRBase)                 |
| <b>ARPC1B</b> | -                 | -                | -                  | -14.1          | 5'-ggctgctcccTCAAAAAGGGAG-3'                                          | 1                         |
|               |                   |                  |                    |                | :<br>3'-uccguauccuACUGUUUCCCUU-5'                                     | (miRBase)                 |
| <b>FAP</b>    | -                 | -                | -                  | -13.32         | 5'-CTGTGAAAGAAGAGAAAAGGGAG-3'                                         | 1                         |
|               |                   |                  |                    |                | : :                 :<br>3'-UCCGUAUCCUACU-GUUUCCCUU-5'                | (miRBase)                 |
| <b>BIRC2</b>  | -                 | -                | -                  | -12.16         | 5'-AGCCATCTAAAGTAAAAAGGGAA-3'                                         | 1                         |
|               |                   |                  |                    |                | <br>3'-UCCGUAUCCUAC-UGUUUCCCUU-5'                                     | (miRBase)                 |
| <b>BMP1</b>   | -                 | -                | -10.6              | -              | 5'-tGTGTGAAGTAAAAGAGGGAc-3'                                           | 1                         |
|               |                   |                  |                    |                | .   . : :   : . :   .   :         .<br>3'-uCCGUAUCCUACUGUUUCCCUu-5'   | (miRnada)                 |
| <b>EFNB1</b>  | -                 | -                | -                  | -              | 5'AGGCAGGGCTGGACACTGATGGACAGCAGGCAGGGAG 3'                            | 1                         |
|               |                   |                  |                    |                | :           :         :<br>3'UCCGU----AUC-----CUA-CUG-----UUUCCCUU 5' | (miRBase)                 |

**Supporting Table 9. Three cross references.** This table describes three cross-reference tables, ensemblXref3, kgXref, and a core data from HUGO's HGNC were used, when required, to convert each target gene ID to its corresponding HGNC gene symbol (**Methods**).

| Database          | Version | Downloaded file | Downloaded date | Usage                                              | microRNA dataset | URL                                                                                                                             |
|-------------------|---------|-----------------|-----------------|----------------------------------------------------|------------------|---------------------------------------------------------------------------------------------------------------------------------|
| ensemblXref       | hg18    | ensemblXref3    | July-19-2007    | mapping Uniprot entry name to approved gene symbol | miRBase          | <a href="http://hgdownload.cse.ucsc.edu/goldenPath/hg18/database/">http://hgdownload.cse.ucsc.edu/goldenPath/hg18/database/</a> |
|                   |         |                 |                 | mapping Uniprot entry name to approved gene symbol | miRanda          |                                                                                                                                 |
|                   |         |                 |                 | mapping ensembl Id to Uniprot entry name           | miRanda          |                                                                                                                                 |
| "All data export" |         | All data        | July-13-2007    | mapping refseq ID to approved gene symbol          | picTar           | <a href="http://www.genenames.org/data/gdlw_index.html">http://www.genenames.org/data/gdlw_index.html</a>                       |
|                   |         |                 |                 | mapping Uniprot entry name to approved gene symbol | miRanda          |                                                                                                                                 |
|                   |         |                 |                 | mapping Uniprot entry name to approved gene symbol | miRBase          |                                                                                                                                 |
|                   |         |                 |                 | mapping Uniprot entry name to approved gene symbol | miRanda          |                                                                                                                                 |
| kgXref            | hg18    | kgXref          | July-19-2007    | mapping Uniprot entry name to approved gene symbol | miRBase          | <a href="http://hgdownload.cse.ucsc.edu/goldenPath/hg18/database/">http://hgdownload.cse.ucsc.edu/goldenPath/hg18/database/</a> |
|                   |         |                 |                 | mapping Uniprot entry name to approved gene symbol | miRanda          |                                                                                                                                 |
|                   |         |                 |                 | mapping refseq ID to approved gene symbol          | picTar           |                                                                                                                                 |

**Supporting Table 10. Datasets used in the protein-protein interaction network (related to Figure 3).** Seven protein interactions network datasets were downloaded and standardized to two-column lists of pair-wise interactions between SwissProt accession IDs, with an additional column providing the source dataset and references to the literature when available.

| Database | File name                                           | Filtering | Used original ID to be converted swissProt accession number | Used the cross reference to convert original ID to swissProt accession number | Type of interaction (from d/l files) | Download date    | URL                                                                                                     |
|----------|-----------------------------------------------------|-----------|-------------------------------------------------------------|-------------------------------------------------------------------------------|--------------------------------------|------------------|---------------------------------------------------------------------------------------------------------|
| BioGRID  | BIOGRID-ORGANISM-2.0.25.tab                         | Yes       | HGNC Unique ID                                              | HGNC                                                                          | -                                    | March 17, 2007   | <a href="http://www.thebiogrid.org/downloads.php">http://www.thebiogrid.org/downloads.php</a>           |
| Reactome | homo_sapiens.interactions.txt                       | Yes       | swissProt accession number                                  | -                                                                             | 4                                    | October 27, 2006 | <a href="http://reactome.org/download/index.html">http://reactome.org/download/index.html</a>           |
| DIP      | Hsapi20070107                                       | No        | swissProt accession number                                  | -                                                                             | -                                    | January 7, 2007  | <a href="http://dip.doe-mbi.ucla.edu/dip/Download.cgi">http://dip.doe-mbi.ucla.edu/dip/Download.cgi</a> |
| MINT     | Mammalia-mitab                                      | Yes       | swissProt accession number                                  | -                                                                             | 9                                    | December 5, 2006 | <a href="http://mint.bio.uniroma2.it/mint/download.do">http://mint.bio.uniroma2.it/mint/download.do</a> |
| HPRD     | HPRD_Release_6_10012006                             | Yes       | Entrez Gene identifier                                      | HGNC                                                                          | -                                    | December 6, 2006 | <a href="http://www.hprd.org/download">http://www.hprd.org/download</a>                                 |
| BIND     | 20060525.nrints                                     | Yes       | BIND identifier                                             | binddbxref.1                                                                  | -                                    | October 10, 2006 | <a href="http://bond.unleashedinformatics.com">http://bond.unleashedinformatics.com</a>                 |
| KEGG     | Release 4.0 of hsaXXX.xml (XXX = all numbered data) | No        | swissProt accession number                                  | genes_uniprot.list                                                            | -                                    | October, 2006    | <a href="http://www.genome.jp/kegg/">http://www.genome.jp/kegg/</a>                                     |



**Supporting Table 11. Upregulated genes in HNSCC microarrays (GSE6631) analyzed by single protein interaction network** (related to **Figure 3**). The unadjusted *P*-value is assigned to each HNSCC protein by measuring the frequency at which the observed count of protein interaction for that HNSCC protein occurred in the empirical distribution of 10,000 permutation re-sampling of the network (Single Protein Network Modeling in **Methods**). 260 of the upregulated genes could be translated to protein interactions in the protein network (PPIN in **Methods**). Of these, 56 proteins with unadjusted *P*-value <0.05 were prioritized (named proteins in the network presented in **Figure 3**), and their other interactors are detailed in **Table S12** (unnamed grey dots in **Figure 3**).

| Up-regulated gene in HNSCC | Corresponding Swissprot entry name in PPIN | Corresponding Swissprot accession number in PPIN | Observed number of protein inter-action partners | Un-adjusted probability | Gene name                                                            |
|----------------------------|--------------------------------------------|--------------------------------------------------|--------------------------------------------------|-------------------------|----------------------------------------------------------------------|
| COL1A1                     | CO1A1_HUMAN                                | P02452                                           | 11                                               | <0.0001                 | Collagen alpha-1(I) chain precursor (Alpha-1 type I collagen)        |
| COL4A1                     | CO4A1_HUMAN                                | P02462                                           | 8                                                | <0.0001                 | Collagen alpha-1(IV) chain precursor (Arresten)                      |
| FN1                        | FINC_HUMAN                                 | P02751                                           | 11                                               | <0.0001                 | Fibronectin precursor (FN) (Cold-insoluble globulin) (CIG)           |
| COL1A2                     | CO1A2_HUMAN                                | P08123                                           | 10                                               | <0.0001                 | Collagen alpha-2(I) chain precursor (Alpha-2 type I collagen)        |
| COL4A2                     | CO4A2_HUMAN                                | P08572                                           | 8                                                | <0.0001                 | Collagen alpha-2(IV) chain precursor [Contains: Canstatin]           |
| SPARC                      | SPRC_HUMAN                                 | P09486                                           | 6                                                | <0.0001                 | SPARC precursor (Secreted protein acidic and rich in cysteine        |
| MMP9                       | MMP9_HUMAN                                 | P14780                                           | 8                                                | <0.0001                 | Matrix metalloproteinase-9 precursor (EC 3.4.24.35) (MMP-9) (92 kD   |
| BGN                        | PGS1_HUMAN                                 | P21810                                           | 7                                                | <0.0001                 | Biglycan precursor (Bone/cartilage proteoglycan I) (PG-S1)           |
| BSG                        | BASI_HUMAN                                 | P35613                                           | 4                                                | <0.0001                 | Basigin precursor (Leukocyte activation antigen M6) (Collagenas      |
| CKS1B                      | CKS1_HUMAN                                 | P61024                                           | 7                                                | <0.0001                 | Cyclin-dependent kinases regulatory subunit 1 (CKS-1)                |
| COL7A1                     | CO7A1_HUMAN                                | Q02388                                           | 5                                                | <0.0001                 | Collagen alpha-1(VII) chain precursor (Long-chain collagen) (L       |
| LAMB3                      | LAMB3_HUMAN                                | Q13751                                           | 4                                                | <0.0001                 | Laminin subunit beta-3 precursor (Laminin 5 beta 3) (Laminin B1      |
| LAMC2                      | LAMC2_HUMAN                                | Q13753                                           | 5                                                | <0.0001                 | Laminin subunit gamma-2 precursor (Laminin 5 gamma 2 subunit         |
| TGFBI                      | BGH3_HUMAN                                 | Q15582                                           | 6                                                | <0.0001                 | Transforming growth factor-beta-induced protein ig-h3 precursor (Bet |
| CDC2                       | CDC2_HUMAN                                 | P06493                                           | 18                                               | 0.0001                  | Cell division control protein 2 homolog (EC 2.7.11.22) (EC 2.7.11.23 |
| GIN51                      | PSF1_HUMAN                                 | Q14691                                           | 5                                                | 0.0001                  | DNA replication complex GINS protein PSF1                            |
| APP                        | A4_HUMAN                                   | P05067                                           | 10                                               | 0.0002                  | Amyloid beta A4 protein precursor (APP) (ABPP) (Alzheimer diseas     |
| ITGA5                      | ITA5_HUMAN                                 | P08648                                           | 6                                                | 0.0002                  | Integrin alpha-5 precursor (Fibronectin receptor subunit alpha       |
| SPP1                       | OSTP_HUMAN                                 | P10451                                           | 4                                                | 0.0003                  | Osteopontin precursor (Bone sialoprotein-1) (Secreted phosphoprotei  |
| BMP1                       | BMP1_HUMAN                                 | P13497                                           | 4                                                | 0.0003                  | Bone morphogenetic protein 1 precursor (EC 3.4.24.19) (BMP-1         |
| NID1                       | NID1_HUMAN                                 | P14543                                           | 7                                                | 0.0005                  | Nidogen-1 precursor (Entactin)                                       |

| Up-regulated gene in HNSCC | Corresponding Swissprot entry name in PPIN | Corresponding Swissprot accession number in PPIN | Observed number of protein inter-action partners | Un-adjusted probability | Gene name                                                             |
|----------------------------|--------------------------------------------|--------------------------------------------------|--------------------------------------------------|-------------------------|-----------------------------------------------------------------------|
| PLEC1                      | PLEC1_HUMAN                                | Q15149                                           | 5                                                | 0.0011                  | Plectin-1 (PLTN) (PCN) (Hemidesmosomal protein 1) (HD1) (Plectin-11)  |
| LAMA3                      | LAMA3_HUMAN                                | Q16787                                           | 4                                                | 0.0011                  | Laminin subunit alpha-3 precursor (Epiligrin 170 kDa subunit) (E170)  |
| ITGAV                      | ITAV_HUMAN                                 | P06756                                           | 6                                                | 0.0016                  | Integrin alpha-V precursor (Vitronectin receptor subunit alpha) (CD5) |
| ITGA3                      | ITA3_HUMAN                                 | P26006                                           | 5                                                | 0.0017                  | Integrin alpha-3 precursor (Galactoprotein B3) (GAPB3) (VLA-3 alph    |
| CDC20                      | CDC20_HUMAN                                | Q12834                                           | 10                                               | 0.0017                  | Cell division cycle protein 20 homolog (p55CDC)                       |
| ITGB4                      | ITB4_HUMAN                                 | P16144                                           | 4                                                | 0.0019                  | Integrin beta-4 precursor (GP150) (CD104 antigen)                     |
| CD44                       | CD44_HUMAN                                 | P16070                                           | 6                                                | 0.0033                  | CD44 antigen precursor (Phagocytic glycoprotein I) (PGP-1) (HUTCH-I   |
| UBE2C                      | UBE2C_HUMAN                                | O00762                                           | 9                                                | 0.0036                  | Ubiquitin-conjugating enzyme E2 C (EC 6.3.2.19) (Ubiquitin-protei     |
| CCNA2                      | CCNA2_HUMAN                                | P20248                                           | 6                                                | 0.0048                  | Cyclin-A2 (Cyclin-A)                                                  |
| CCNE1                      | CCNE1_HUMAN                                | P24864                                           | 5                                                | 0.0048                  | G1/S-specific cyclin-E1                                               |
| MCM3                       | MCM3_HUMAN                                 | P25205                                           | 6                                                | 0.0048                  | DNA replication licensing factor MCM3 (DNA polymerase alph            |
| HIST1H3A                   | H31_HUMAN                                  | P68431                                           | 4                                                | 0.005                   | Histone H3.1 (H3/a) (H3/b) (H3/c) (H3/d) (H3/f) (H3/h) (H3/i) (H3/j   |
| TNC                        | TENA_HUMAN                                 | P24821                                           | 4                                                | 0.0065                  | Tenascin precursor (TN) (Tenascin-C) (TN-C) (Hexabrachion             |
| CDKN3                      | CDKN3_HUMAN                                | Q16667                                           | 4                                                | 0.007                   | Cyclin-dependent kinase inhibitor 3 (EC 3.1.3.48) (EC 3.1.3.16) (CDK2 |
| LUM                        | LUM_HUMAN                                  | P51884                                           | 3                                                | 0.01                    | Lumican precursor (Keratan sulfate proteoglycan lumican) (KSP         |
| CKS2                       | CKS2_HUMAN                                 | P33552                                           | 3                                                | 0.0112                  | Cyclin-dependent kinases regulatory subunit 2 (CKS-2)                 |
| PLAUR                      | UPAR_HUMAN                                 | Q03405                                           | 5                                                | 0.0137                  | Urokinase plasminogen activator surface receptor precursor (uPAR) (U  |
| EGFR                       | EGFR_HUMAN                                 | P00533                                           | 11                                               | 0.0146                  | Epidermal growth factor receptor precursor (EC 2.7.10.1) (Recepto     |
| CCNB2                      | CCNB2_HUMAN                                | O95067                                           | 3                                                | 0.0186                  | G2/mitotic-specific cyclin-B2                                         |
| SERPINE2                   | GDN_HUMAN                                  | P07093                                           | 3                                                | 0.0188                  | Glia-derived nexin precursor (GDN) (Protease nexin I) (PN-1) (Proteas |
| MCM7                       | MCM7_HUMAN                                 | P33993                                           | 6                                                | 0.0256                  | DNA replication licensing factor MCM7 (CDC47 homolog) (P1.1-MCM3)     |
| BUB1B                      | BUB1B_HUMAN                                | O60566                                           | 7                                                | 0.0261                  | Mitotic checkpoint serine/threonine-protein kinase BUB1 bet           |
| PLAU                       | UROK_HUMAN                                 | P00749                                           | 4                                                | 0.03                    | Urokinase-type plasminogen activator precursor (EC 3.4.21.73) (uPA    |
| AURKA                      | STK6_HUMAN                                 | O14965                                           | 7                                                | 0.0305                  | Serine/threonine-protein kinase 6 (EC 2.7.11.1) (Aurora kinase A      |
| SHC1                       | SHC1_HUMAN                                 | P29353                                           | 11                                               | 0.0309                  | SHC-transforming protein 1 (SH2 domain protein C1) (Src homology      |
| SLC16A3                    | MOT4_HUMAN                                 | O15427                                           | 2                                                | 0.0314                  | Monocarboxylate transporter 4 (MCT 4) (MCT 3) (Solute carrier famil   |
| SLC7A5                     | LAT1_HUMAN                                 | Q01650                                           | 2                                                | 0.0329                  | Large neutral amino acids transporter small subunit 1 (L-type amin    |
| PSMB2                      | PSB2_HUMAN                                 | P49721                                           | 8                                                | 0.033                   | Proteasome subunit beta type 2 (EC 3.4.25.1) (Proteasome component C7 |
| CDC25B                     | MPIP2_HUMAN                                | P30305                                           | 4                                                | 0.0333                  | M-phase inducer phosphatase 2 (EC 3.1.3.48) (Dual specificit          |
| KRT17                      | K1C17_HUMAN                                | Q04695                                           | 2                                                | 0.0341                  | Keratin, type I cytoskeletal 17 (Cytokeratin-17) (CK-17) (Keratin-17  |

| Up-regulated gene in HNSCC | Corresponding Swissprot entry name in PPIN | Corresponding Swissprot accession number in PPIN | Observed number of protein inter-action partners | Un-adjusted probability | Gene name                                                             |
|----------------------------|--------------------------------------------|--------------------------------------------------|--------------------------------------------------|-------------------------|-----------------------------------------------------------------------|
| PKMYT1                     | PMYT1_HUMAN                                | Q99640                                           | 3                                                | 0.0363                  | Membrane-associated tyrosine- and threonine-specific cdc2-inhibitor   |
| STAT1                      | STAT1_HUMAN                                | P42224                                           | 6                                                | 0.0425                  | Signal transducer and activator of transcription 1-alpha/bet          |
| GAA                        | LYAG_HUMAN                                 | P10253                                           | 3                                                | 0.0433                  | Lysosomal alpha-glucosidase precursor (EC 3.2.1.20) (Acid maltase     |
| AURKB                      | AURKB_HUMAN                                | Q96GD4                                           | 7                                                | 0.0445                  | Serine/threonine-protein kinase 12 (EC 2.7.11.1) (Aurora-B) (Aurora   |
| MCM6                       | MCM6_HUMAN                                 | Q14566                                           | 5                                                | 0.0448                  | DNA replication licensing factor MCM6 (p105MCM)                       |
| MFAP2                      | MFAP2_HUMAN                                | P55001                                           | 2                                                | 0.0504                  | Microfibrillar-associated protein 2 precursor (MFAP-2) (Microfibril   |
| SLC16A1                    | MOT1_HUMAN                                 | P53985                                           | 2                                                | 0.0518                  | Monocarboxylate transporter 1 (MCT 1) (Solute carrier family 16 membe |
| PTK2                       | FAK1_HUMAN                                 | Q05397                                           | 6                                                | 0.0522                  | Focal adhesion kinase 1 (EC 2.7.10.2) (FADK 1) (pp125FAK) (Protein    |
| CBLB                       | CBLB_HUMAN                                 | Q13191                                           | 3                                                | 0.0539                  | E3 ubiquitin-protein ligase CBL-B (EC 6.3.2.-) (Signal transductio    |
| PSMD2                      | PSMD2_HUMAN                                | Q13200                                           | 8                                                | 0.0541                  | 26S proteasome non-ATPase regulatory subunit 2 (26S proteasom         |
| CUX1                       | CUTL1_HUMAN                                | P39880                                           | 3                                                | 0.0667                  | Homeobox protein cut-like 1 (CCAAT displacement protein) (CDP)        |
| TGFB1                      | TGFB1_HUMAN                                | P01137                                           | 5                                                | 0.0727                  | Transforming growth factor beta-1 precursor (TGF-beta-1) [Contains    |
| LAMC1                      | LAMC1_HUMAN                                | P11047                                           | 2                                                | 0.0754                  | Laminin subunit gamma-1 precursor (Laminin B2 chain)                  |
| MCM2                       | MCM2_HUMAN                                 | P49736                                           | 5                                                | 0.0755                  | DNA replication licensing factor MCM2 (Minichromosome maintenanc      |
| MDK                        | MK_HUMAN                                   | P21741                                           | 3                                                | 0.0758                  | Midkine precursor (MK) (Neurite outgrowth-promoting protein           |
| SPAG5                      | SPAG5_HUMAN                                | Q96R06                                           | 2                                                | 0.0818                  | Sperm-associated antigen 5 (Astrin) (Mitotic spindle-associate        |
| LAMB1                      | LAMB1_HUMAN                                | P07942                                           | 2                                                | 0.0821                  | Laminin subunit beta-1 precursor (Laminin B1 chain)                   |
| SERPINE1                   | PAI1_HUMAN                                 | P05121                                           | 3                                                | 0.085                   | Plasminogen activator inhibitor 1 precursor (PAI-1) (Endothelia       |
| CD151                      | CD151_HUMAN                                | P48509                                           | 2                                                | 0.0922                  | CD151 antigen (Platelet-endothelial tetraspan antigen 3) (PETA-3      |
| CALD1                      | CALD1_HUMAN                                | Q05682                                           | 2                                                | 0.0975                  | Caldesmon (CDM)                                                       |
| CCNB1                      | CCNB1_HUMAN                                | P14635                                           | 5                                                | 0.1035                  | G2/mitotic-specific cyclin-B1                                         |
| INHBA                      | INHBA_HUMAN                                | P08476                                           | 3                                                | 0.1263                  | Inhibin beta A chain precursor (Activin beta-A chain) (Erythro        |
| FSTL3                      | FSTL3_HUMAN                                | O95633                                           | 2                                                | 0.1293                  | Follistatin-related protein 3 precursor (Follistatin-like 3           |
| CBX1                       | CBX1_HUMAN                                 | P83916                                           | 3                                                | 0.1341                  | Chromobox protein homolog 1 (Heterochromatin protein 1 homolog beta   |
| GMPS                       | GUAA_HUMAN                                 | P49915                                           | 3                                                | 0.1395                  | GMP synthase [glutamine-hydrolyzing] (EC 6.3.5.2) (Glutamin           |
| CENPA                      | CENPA_HUMAN                                | P49450                                           | 2                                                | 0.1429                  | Histone H3-like centromeric protein A (Centromere protein A) (CENP-A  |
| RB1                        | RB_HUMAN                                   | P06400                                           | 9                                                | 0.1443                  | Retinoblastoma-associated protein (PP110) (P105-RB) (RB)              |
| PTPRZ1                     | PTPRZ_HUMAN                                | P23471                                           | 2                                                | 0.1513                  | Receptor-type tyrosine-protein phosphatase zeta precursor             |
| APBB2                      | APBB2_HUMAN                                | Q92870                                           | 2                                                | 0.1513                  | Amyloid beta A4 precursor protein-binding family B member 2 (Fe65-lik |
| TXNRD1                     | TRXR1_HUMAN                                | Q16881                                           | 2                                                | 0.1523                  | Thioredoxin reductase 1, cytoplasmic precursor (EC 1.8.1.9) (TR       |

| Up-regulated gene in HNSCC | Corresponding Swissprot entry name in PPIN | Corresponding Swissprot accession number in PPIN | Observed number of protein inter-action partners | Un-adjusted probability | Gene name                                                             |
|----------------------------|--------------------------------------------|--------------------------------------------------|--------------------------------------------------|-------------------------|-----------------------------------------------------------------------|
| FAP                        | SEPR_HUMAN                                 | Q12884                                           | 2                                                | 0.1559                  | Seprase (EC 3.4.21.-) (Fibroblast activation protein alpha) (Integra  |
| COL6A1                     | CO6A1_HUMAN                                | P12109                                           | 2                                                | 0.1602                  | Collagen alpha-1(VI) chain precursor                                  |
| THBS2                      | TSP2_HUMAN                                 | P35442                                           | 2                                                | 0.1751                  | Thrombospondin-2 precursor                                            |
| TPX2                       | TPX2_HUMAN                                 | Q9ULW0                                           | 2                                                | 0.1754                  | Targeting protein for Xklp2 (Restricted expression proliferation      |
| THY1                       | THY1_HUMAN                                 | P04216                                           | 2                                                | 0.2006                  | Thy-1 membrane glycoprotein precursor (Thy-1 antigen) (CD90 antigen   |
| PDGFA                      | PDGFA_HUMAN                                | P04085                                           | 2                                                | 0.202                   | Platelet-derived growth factor A chain precursor (PDGF A-chain        |
| CALR                       | CALR_HUMAN                                 | P27797                                           | 3                                                | 0.2081                  | Calreticulin precursor (CRP55) (Calregulin) (HACBP) (ERp60) (grp60)   |
| FCGR2A                     | FCG2A_HUMAN                                | P12318                                           | 2                                                | 0.2204                  | Low affinity immunoglobulin gamma Fc region receptor II-a precurs     |
| EXT1                       | EXT1_HUMAN                                 | Q16394                                           | 2                                                | 0.2292                  | Exostosin-1 (EC 2.4.1.224) (EC 2.4.1.225) (Glucuronosyl-N             |
| COL3A1                     | CO3A1_HUMAN                                | P02461                                           | 2                                                | 0.2303                  | Collagen alpha-1(III) chain precursor                                 |
| IMPDH1                     | IMDH1_HUMAN                                | P20839                                           | 3                                                | 0.2421                  | Inosine-5'-monophosphate dehydrogenase 1 (EC 1.1.1.205) (IM           |
| MMP1                       | MMP1_HUMAN                                 | P03956                                           | 2                                                | 0.2455                  | Interstitial collagenase precursor (EC 3.4.24.7) (Matri               |
| IGF1R                      | IGF1R_HUMAN                                | P08069                                           | 4                                                | 0.2674                  | Insulin-like growth factor 1 receptor precursor (EC 2.7.10.1          |
| AP2B1                      | AP2B1_HUMAN                                | P63010                                           | 2                                                | 0.2685                  | AP-2 complex subunit beta-1 (Adapter-related protein complex 2 beta-  |
| CBX3                       | CBX3_HUMAN                                 | Q13185                                           | 2                                                | 0.2709                  | Chromobox protein homolog 3 (Heterochromatin protein 1 homolog gamma  |
| IGFBP7                     | IBP7_HUMAN                                 | Q16270                                           | 2                                                | 0.2799                  | Insulin-like growth factor-binding protein 7 precursor (IGFBP-7) (IBP |
| EXT2                       | EXT2_HUMAN                                 | Q93063                                           | 2                                                | 0.2832                  | Exostosin-2 (EC 2.4.1.224) (EC 2.4.1.225) (Glucuronosyl-N             |
| MMP14                      | MMP14_HUMAN                                | P50281                                           | 2                                                | 0.2883                  | Matrix metalloproteinase-14 precursor (EC 3.4.24.80) (MMP-14          |
| PDGFRB                     | PGFRB_HUMAN                                | P09619                                           | 4                                                | 0.3125                  | Beta-type platelet-derived growth factor receptor precurs             |
| SLC3A2                     | 4F2_HUMAN                                  | P08195                                           | 2                                                | 0.3215                  | 4F2 cell-surface antigen heavy chain (4F2hc) (Lymphocyte activatio    |
| RRM2                       | RIR2_HUMAN                                 | P31350                                           | 3                                                | 0.3685                  | Ribonucleoside-diphosphate reductase M2 subunit (EC 1.17.4.1          |
| ITGA6                      | ITA6_HUMAN                                 | P23229                                           | 2                                                | 0.4216                  | Integrin alpha-6 precursor (VLA-6) (CD49f antigen) [Contains: Integri |
| MYBL2                      | MYBB_HUMAN                                 | P10244                                           | 2                                                | 0.4248                  | Myb-related protein B (B-Myb)                                         |
| RFC5                       | RFC5_HUMAN                                 | P40937                                           | 3                                                | 0.4676                  | Replication factor C subunit 5 (Replication factor C 36 kDa subunit   |
| TAF6                       | TAF6_HUMAN                                 | P49848                                           | 3                                                | 0.4976                  | Transcription initiation factor TFIID subunit 6 (Transcriptio         |
| GTF2E1                     | T2EA_HUMAN                                 | P29083                                           | 3                                                | 0.5548                  | Transcription initiation factor IIE subunit alpha (TFIIE-alpha        |
| MSN                        | MOES_HUMAN                                 | P26038                                           | 2                                                | 0.5633                  | Moesin (Membrane-organizing extension spike protein)                  |
| IRS1                       | IRS1_HUMAN                                 | P35568                                           | 3                                                | 0.6408                  | Insulin receptor substrate 1 (IRS-1)                                  |
| AHR                        | AHR_HUMAN                                  | P35869                                           | 2                                                | 0.6499                  | Aryl hydrocarbon receptor precursor (Ah receptor) (AhR)               |
| SNAPC1                     | SNPC1_HUMAN                                | Q16533                                           | 2                                                | 0.6655                  | snRNA-activating protein complex subunit 1 (SNAPc subunit 1) (snRNA   |

| Up-regulated gene in HNSCC | Corresponding Swissprot entry name in PPIN | Corresponding Swissprot accession number in PPIN | Observed number of protein inter-action partners | Un-adjusted probability | Gene name                                                             |
|----------------------------|--------------------------------------------|--------------------------------------------------|--------------------------------------------------|-------------------------|-----------------------------------------------------------------------|
| RFC4                       | RFC4_HUMAN                                 | P35249                                           | 2                                                | 0.722                   | Replication factor C subunit 4 (Replication factor C 37 kDa subunit   |
| GNAI1                      | GNAI1_HUMAN                                | P63096                                           | 2                                                | 0.7404                  | Guanine nucleotide-binding protein G(i), alpha-1 subunit (Adenylat    |
| HPRT1                      | HPRT_HUMAN                                 | P00492                                           | 3                                                | 0.753                   | Hypoxanthine-guanine phosphoribosyltransferase (EC 2.4.2.8) (HGPRT    |
| AKR1B1                     | ALDR_HUMAN                                 | P15121                                           | 2                                                | 0.7665                  | Aldose reductase (EC 1.1.1.21) (AR) (Aldehyde reductase)              |
| HK2                        | HXK2_HUMAN                                 | P52789                                           | 2                                                | 0.8157                  | Hexokinase-2 (EC 2.7.1.1) (Hexokinase type II) (HK II) (Muscle for    |
| NME4                       | NDKM_HUMAN                                 | O00746                                           | 3                                                | 0.8706                  | Nucleoside diphosphate kinase, mitochondrial precursor (EC 2.7.4.6    |
| POLR2G                     | RPB7_HUMAN                                 | P62487                                           | 5                                                | 0.891                   | DNA-directed RNA polymerase II subunit RPB7 (RNA polymerase II subuni |
| PRPF4                      | PRP4_HUMAN                                 | O43172                                           | 3                                                | 0.9188                  | U4/U6 small nuclear ribonucleoprotein Prp4 (U4/U6 snRNP 60 kD         |
| NCBP2                      | NCBP2_HUMAN                                | P52298                                           | 3                                                | 0.9735                  | Nuclear cap-binding protein subunit 2 (20 kDa nuclear cap-bindin      |
| AGPS                       | ADAS_HUMAN                                 | O00116                                           | 1                                                | 1                       | Alkyldihydroxyacetonephosphate synthase, peroxisomal precurso         |
| PLOD2                      | PLOD2_HUMAN                                | O00469                                           | 1                                                | 1                       | Procollagen-lysine,2-oxoglutarate 5-dioxygenase 2 precurso            |
| APOL1                      | APOL1_HUMAN                                | O14791                                           | 1                                                | 1                       | Apolipoprotein-L1 precursor (Apolipoprotein L-I) (Apolipoprotein L    |
| CASK                       | CSKP_HUMAN                                 | O14936                                           | 1                                                | 1                       | Peripheral plasma membrane protein CASK (EC 2.7.11.1) (hCASK          |
| KIF3B                      | KIF3B_HUMAN                                | O15066                                           | 1                                                | 1                       | Kinesin-like protein KIF3B (Microtubule plus end-directed kinesi      |
| ARPC1B                     | ARC1B_HUMAN                                | O15143                                           | 1                                                | 1                       | Actin-related protein 2/3 complex subunit 1B (ARP2/3 complex 41 kD    |
| LAMA5                      | LAMA5_HUMAN                                | O15230                                           | 1                                                | 1                       | Laminin subunit alpha-5 precursor                                     |
| P4HA2                      | P4HA2_HUMAN                                | O15460                                           | 1                                                | 1                       | Prolyl 4-hydroxylase subunit alpha-2 precursor (EC 1.14.11.2) (4-P    |
| YKT6                       | YKT6_HUMAN                                 | O15498                                           | 1                                                | 1                       | Synaptobrevin homolog YKT6 (EC 2.3.1.-)                               |
| CALU                       | CALU_HUMAN                                 | O43852                                           | 1                                                | 1                       | Calumenin precursor (Crocabin) (IEF SSP 9302)                         |
| NUAK1                      | NUAK1_HUMAN                                | O60285                                           | 1                                                | 1                       | NUAK family SNF1-like kinase 1 (EC 2.7.11.1) (AMPK-related protei     |
| FZD6                       | FZD6_HUMAN                                 | O60353                                           | 1                                                | 1                       | Frizzled-6 precursor (Fz-6) (hFz6)                                    |
| TPST1                      | TPST1_HUMAN                                | O60507                                           | 1                                                | 1                       | Protein-tyrosine sulfotransferase 1 (EC 2.8.2.20) (Tyrosylprotei      |
| TLR2                       | TLR2_HUMAN                                 | O60603                                           | 1                                                | 1                       | Toll-like receptor 2 precursor (Toll/interleukin 1 receptor-lik       |
| B4GALT2                    | B4GT2_HUMAN                                | O60909                                           | 1                                                | 1                       | Beta-1,4-galactosyltransferase 2 (EC 2.4.1.-) (Beta-1,4-GalTase 2     |
| NUP155                     | NU155_HUMAN                                | O75694                                           | 1                                                | 1                       | Nuclear pore complex protein Nup155 (Nucleoporin Nup155) (155 kD      |
| KLF7                       | KLF7_HUMAN                                 | O75840                                           | 1                                                | 1                       | Krueppel-like factor 7 (Ubiquitous krueppel-like factor)              |
| PAK3                       | PAK3_HUMAN                                 | O75914                                           | 1                                                | 1                       | Serine/threonine-protein kinase PAK 3 (EC 2.7.11.1) (p21-activate     |
| TRIO                       | TRIO_HUMAN                                 | O75962                                           | 1                                                | 1                       | Triple functional domain protein (EC 2.7.11.1) (PTPRF-interactin      |
| PFTK1                      | PFTK1_HUMAN                                | O94921                                           | 1                                                | 1                       | Serine/threonine-protein kinase PFTAIR-1 (EC 2.7.11.22)               |
| YIF1A                      | YIF1A_HUMAN                                | O95070                                           | 1                                                | 1                       | Protein YIF1A (YIP1-interacting factor homolog A) (54TmP)             |

| Up-regulated gene in HNSCC | Corresponding Swissprot entry name in PPIN | Corresponding Swissprot accession number in PPIN | Observed number of protein inter-action partners | Un-adjusted probability | Gene name                                                             |
|----------------------------|--------------------------------------------|--------------------------------------------------|--------------------------------------------------|-------------------------|-----------------------------------------------------------------------|
| ZWINT                      | ZWINT_HUMAN                                | O95229                                           | 1                                                | 1                       | ZW10 interactor (ZW10-interacting protein 1) (Zwint-1)                |
| ACTL6A                     | ACL6A_HUMAN                                | O96019                                           | 1                                                | 1                       | Actin-like protein 6A (53 kDa BRG1-associated factor A) (Actin-relate |
| ADA                        | ADA_HUMAN                                  | P00813                                           | 1                                                | 1                       | Adenosine deaminase (EC 3.5.4.4) (Adenosine aminohydrolase)           |
| CST3                       | CYTC_HUMAN                                 | P01034                                           | 1                                                | 1                       | Cystatin-C precursor (Cystatin-3) (Neuroendocrine basic polypeptide   |
| TFRC                       | TFR1_HUMAN                                 | P02786                                           | 1                                                | 1                       | Transferrin receptor protein 1 (TfR1) (TR) (TfR) (Trfr) (CD71 antigen |
| TK1                        | KITH_HUMAN                                 | P04183                                           | 1                                                | 1                       | Thymidine kinase, cytosolic (EC 2.7.1.21)                             |
| ISG15                      | UCRP_HUMAN                                 | P05161                                           | 1                                                | 1                       | Interferon-induced 17 kDa protein precursor [Contains: Ubiquiti       |
| COL5A2                     | CO5A2_HUMAN                                | P05997                                           | 1                                                | 1                       | Collagen alpha-2(V) chain precursor                                   |
| NEFL                       | NFL_HUMAN                                  | P07196                                           | 1                                                | 1                       | Neurofilament light polypeptide (NF-L) (Neurofilament triplet         |
| H1FO                       | H10_HUMAN                                  | P07305                                           | 1                                                | 1                       | Histone H1.0 (Histone H1(0)) (Histone H1')                            |
| RHOC                       | RHOC_HUMAN                                 | P08134                                           | 1                                                | 1                       | Rho-related GTP-binding protein RhoC precursor (H9)                   |
| MMP3                       | MMP3_HUMAN                                 | P08254                                           | 1                                                | 1                       | Stromelysin-1 precursor (EC 3.4.24.17) (Matrix metalloproteinase-3    |
| MMP10                      | MMP10_HUMAN                                | P09238                                           | 1                                                | 1                       | Stromelysin-2 precursor (EC 3.4.24.22) (Matrix metalloproteinase-10   |
| LGALS1                     | LEG1_HUMAN                                 | P09382                                           | 1                                                | 1                       | Galectin-1 (Lectin galactoside-binding soluble 1) (Beta-galactoside   |
| RBP1                       | RET1_HUMAN                                 | P09455                                           | 1                                                | 1                       | Retinol-binding protein I, cellular (Cellular retinol-binding protein |
| TPM1                       | TPM1_HUMAN                                 | P09493                                           | 1                                                | 1                       | Tropomyosin alpha-1 chain (Tropomyosin-1) (Alpha-tropomyosin)         |
| HOXB7                      | HXB7_HUMAN                                 | P09629                                           | 1                                                | 1                       | Homeobox protein Hox-B7 (Hox-2C) (HHO.C1)                             |
| IL8                        | IL8_HUMAN                                  | P10145                                           | 1                                                | 1                       | Interleukin-8 precursor (IL-8) (CXCL8) (Monocyte-derived neutrophi    |
| RRAS                       | RRAS_HUMAN                                 | P10301                                           | 1                                                | 1                       | Ras-related protein R-Ras precursor (p23)                             |
| UMPS                       | PYR5_HUMAN                                 | P11172                                           | 1                                                | 1                       | Uridine 5'-monophosphate synthase (UMP synthase) [Includes: Orotat    |
| TOP2A                      | TOP2A_HUMAN                                | P11388                                           | 1                                                | 1                       | DNA topoisomerase 2-alpha (EC 5.99.1.3) (DNA topoisomerase II, alph   |
| COL11A1                    | COBA1_HUMAN                                | P12107                                           | 1                                                | 1                       | Collagen alpha-1(XI) chain precursor                                  |
| COL6A2                     | CO6A2_HUMAN                                | P12110                                           | 1                                                | 1                       | Collagen alpha-2(VI) chain precursor                                  |
| PTH1LH                     | PTHR_HUMAN                                 | P12272                                           | 1                                                | 1                       | Parathyroid hormone-related protein precursor (PTH-rP) (PTHrP         |
| ACTN1                      | ACTN1_HUMAN                                | P12814                                           | 1                                                | 1                       | Alpha-actinin-1 (Alpha-actinin cytoskeletal isoform) (Non-muscl       |
| P4HA1                      | P4HA1_HUMAN                                | P13674                                           | 1                                                | 1                       | Prolyl 4-hydroxylase subunit alpha-1 precursor (EC 1.14.11.2) (4-P    |
| ACP5                       | PPA5_HUMAN                                 | P13686                                           | 1                                                | 1                       | Tartrate-resistant acid phosphatase type 5 precursor (EC 3.1.3.2) (TR |
| MTHFD2                     | MTDC_HUMAN                                 | P13995                                           | 1                                                | 1                       | Bifunctional methylenetetrahydrofolate dehydrogenase/cyclohydrolase   |
| VEGFA                      | VEGFA_HUMAN                                | P15692                                           | 1                                                | 1                       | Vascular endothelial growth factor A precursor (VEGF-A) (Vascula      |
| TCF3                       | TFE2_HUMAN                                 | P15923                                           | 1                                                | 1                       | Transcription factor E2-alpha (Immunoglobulin enhancer-binding facto  |

| Up-regulated gene in HNSCC | Corresponding Swissprot entry name in PPIN | Corresponding Swissprot accession number in PPIN | Observed number of protein inter-action partners | Un-adjusted probability | Gene name                                                             |
|----------------------------|--------------------------------------------|--------------------------------------------------|--------------------------------------------------|-------------------------|-----------------------------------------------------------------------|
| GJA1                       | CXA1_HUMAN                                 | P17302                                           | 1                                                | 1                       | Gap junction alpha-1 protein (Connexin-43) (Cx43) (Gap junction 43 kD |
| GM2A                       | SAP3_HUMAN                                 | P17900                                           | 1                                                | 1                       | Ganglioside GM2 activator precursor (GM2-AP) (Cerebroside sulfat      |
| IGFBP3                     | IBP3_HUMAN                                 | P17936                                           | 1                                                | 1                       | Insulin-like growth factor-binding protein 3 precursor (IGFBP-3) (IBP |
| FST                        | FST_HUMAN                                  | P19883                                           | 1                                                | 1                       | Follistatin precursor (FS) (Activin-binding protein)                  |
| EFNA1                      | EFNA1_HUMAN                                | P20827                                           | 1                                                | 1                       | Ephrin-A1 precursor (EPH-related receptor tyrosine kinase ligand 1    |
| CDH3                       | CADH3_HUMAN                                | P22223                                           | 1                                                | 1                       | Cadherin-3 precursor (Placental-cadherin) (P-cadherin)                |
| CAD                        | PYR1_HUMAN                                 | P27708                                           | 1                                                | 1                       | CAD protein [Includes: Glutamine-dependent carbamoyl-phosphat         |
| LOX                        | LYOX_HUMAN                                 | P28300                                           | 1                                                | 1                       | Protein-lysine 6-oxidase precursor (EC 1.4.3.13) (Lysyl oxidase)      |
| CCND2                      | CCND2_HUMAN                                | P30279                                           | 1                                                | 1                       | G1/S-specific cyclin-D2                                               |
| HLA-F                      | HLAF_HUMAN                                 | P30511                                           | 1                                                | 1                       | HLA class I histocompatibility antigen, alpha chain F precursor (HLA  |
| PFN2                       | PROF2_HUMAN                                | P35080                                           | 1                                                | 1                       | Profilin-2 (Profilin II)                                              |
| FBN2                       | FBN2_HUMAN                                 | P35556                                           | 1                                                | 1                       | Fibrillin-2 precursor                                                 |
| MYH10                      | MYH10_HUMAN                                | P35580                                           | 1                                                | 1                       | Myosin-10 (Myosin heavy chain 10) (Myosin heavy chain, nonmuscle IIb  |
| FEN1                       | FEN1_HUMAN                                 | P39748                                           | 1                                                | 1                       | Flap endonuclease 1 (EC 3.1.-.-) (Flap structure-specific endonucleas |
| EIF2S3                     | IF2G_HUMAN                                 | P41091                                           | 1                                                | 1                       | Eukaryotic translation initiation factor 2 subunit 3 (Eukaryoti       |
| TNFSF9                     | TNFL9_HUMAN                                | P41273                                           | 1                                                | 1                       | Tumor necrosis factor ligand superfamily member 9 (4-1BB ligand) (4   |
| MAGEA4                     | MAGA4_HUMAN                                | P43358                                           | 1                                                | 1                       | Melanoma-associated antigen 4 (MAGE-4 antigen) (MAGE-X2) (MAGE-41)    |
| MMP13                      | MMP13_HUMAN                                | P45452                                           | 1                                                | 1                       | Collagenase 3 precursor (EC 3.4.24.-) (Matrix metalloproteinase-13    |
| ABCG1                      | ABCG1_HUMAN                                | P45844                                           | 1                                                | 1                       | ATP-binding cassette sub-family G member 1 (White protein homolog     |
| SLC6A8                     | SC6A8_HUMAN                                | P48029                                           | 1                                                | 1                       | Sodium- and chloride-dependent creatine transporter 1 (CT1) (Creatin  |
| HSPA13                     | STCH_HUMAN                                 | P48723                                           | 1                                                | 1                       | Stress 70 protein chaperone microsome-associated 60 kDa protei        |
| MARCKSL1                   | MRP_HUMAN                                  | P49006                                           | 1                                                | 1                       | MARCKS-related protein (MARCKS-like protein 1) (Macrophag             |
| VEGFC                      | VEGFC_HUMAN                                | P49767                                           | 1                                                | 1                       | Vascular endothelial growth factor C precursor (VEGF-C) (Vascula      |
| MRE11A                     | MRE11_HUMAN                                | P49959                                           | 1                                                | 1                       | Double-strand break repair protein MRE11A (MRE11 homolog 1) (MRE1     |
| ERF                        | ERF_HUMAN                                  | P50548                                           | 1                                                | 1                       | ETS domain-containing transcription factor ERF (Ets2 represso         |
| PPT1                       | PPT1_HUMAN                                 | P50897                                           | 1                                                | 1                       | Palmitoyl-protein thioesterase 1 precursor (EC 3.1.2.22) (PPT-1       |
| CAV2                       | CAV2_HUMAN                                 | P51636                                           | 1                                                | 1                       | Caveolin-2                                                            |
| MSH6                       | MSH6_HUMAN                                 | P52701                                           | 1                                                | 1                       | DNA mismatch repair protein MSH6 (MutS-alpha 160 kDa subunit) (G/     |
| HMGA2                      | HMGA2_HUMAN                                | P52926                                           | 1                                                | 1                       | High mobility group protein HMGI-C (High mobility group AT-hoo        |
| CTSC                       | CATC_HUMAN                                 | P53634                                           | 1                                                | 1                       | Dipeptidyl-peptidase 1 precursor (EC 3.4.14.1) (Dipeptidyl-peptidas   |

| Up-regulated gene in HNSCC | Corresponding Swissprot entry name in PPIN | Corresponding Swissprot accession number in PPIN | Observed number of protein inter-action partners | Un-adjusted probability | Gene name                                                             |
|----------------------------|--------------------------------------------|--------------------------------------------------|--------------------------------------------------|-------------------------|-----------------------------------------------------------------------|
| MAPK10                     | MK10_HUMAN                                 | P53779                                           | 1                                                | 1                       | Mitogen-activated protein kinase 10 (EC 2.7.11.24) (Stress-activate   |
| BCAT1                      | BCAT1_HUMAN                                | P54687                                           | 1                                                | 1                       | Branched-chain-amino-acid aminotransferase, cytosolic (EC 2.6.1.42    |
| RAD23A                     | RD23A_HUMAN                                | P54725                                           | 1                                                | 1                       | UV excision repair protein RAD23 homolog A (hHR23A)                   |
| CDH11                      | CAD11_HUMAN                                | P55287                                           | 1                                                | 1                       | Cadherin-11 precursor (Osteoblast-cadherin) (OB-cadherin) (OSF-4)     |
| CDH13                      | CAD13_HUMAN                                | P55290                                           | 1                                                | 1                       | Cadherin-13 precursor (Truncated-cadherin) (T-cadherin) (T-cad        |
| RRAS2                      | RRAS2_HUMAN                                | P62070                                           | 1                                                | 1                       | Ras-related protein R-Ras2 precursor (Ras-like protein TC21           |
| RHOB                       | RHOB_HUMAN                                 | P62745                                           | 1                                                | 1                       | Rho-related GTP-binding protein RhoB precursor (H6)                   |
| HIST1H2BC                  | H2B1C_HUMAN                                | P62807                                           | 1                                                | 1                       | Histone H2B type 1-C/E/F/G/I (H2B.a/g/h/k/l) (H2B.1 A) (H2B/a) (H2B/g |
| IFI35                      | IN35_HUMAN                                 | P80217                                           | 1                                                | 1                       | Interferon-induced 35 kDa protein (IFP 35)                            |
| TMF1                       | TMF1_HUMAN                                 | P82094                                           | 1                                                | 1                       | TATA element modulatory factor (TMF)                                  |
| EFNB1                      | EFNB1_HUMAN                                | P98172                                           | 1                                                | 1                       | Ephrin-B1 precursor (EPH-related receptor tyrosine kinase ligand 2    |
| RUNX1                      | RUNX1_HUMAN                                | Q01196                                           | 1                                                | 1                       | Runt-related transcription factor 1 (Core-binding factor, alpha       |
| LMNB2                      | LMNB2_HUMAN                                | Q03252                                           | 1                                                | 1                       | Lamin-B2                                                              |
| COL10A1                    | COAA1_HUMAN                                | Q03692                                           | 1                                                | 1                       | Collagen alpha-1(X) chain precursor                                   |
| SOX4                       | SOX4_HUMAN                                 | Q06945                                           | 1                                                | 1                       | Transcription factor SOX-4                                            |
| BAX                        | BAXB_HUMAN                                 | Q07814                                           | 1                                                | 1                       | Apoptosis regulator BAX, cytoplasmic isoform beta                     |
| GALNT2                     | GALT2_HUMAN                                | Q10471                                           | 1                                                | 1                       | Polypeptide N-acetylgalactosaminyltransferase 2 (EC 2.4.1.41          |
| PPFIA1                     | LIPA1_HUMAN                                | Q13136                                           | 1                                                | 1                       | Liprin-alpha-1 (Protein tyrosine phosphatase receptor type            |
| FADD                       | FADD_HUMAN                                 | Q13158                                           | 1                                                | 1                       | Protein FADD (FAS-associated death domain protein) (FAS-associatin    |
| PAK2                       | PAK2_HUMAN                                 | Q13177                                           | 1                                                | 1                       | Serine/threonine-protein kinase PAK 2 (EC 2.7.11.1) (p21-activate     |
| STK3                       | STK3_HUMAN                                 | Q13188                                           | 1                                                | 1                       | Serine/threonine-protein kinase 3 (EC 2.7.11.1) (STE20-like kinas     |
| TUSC3                      | TUSC3_HUMAN                                | Q13454                                           | 1                                                | 1                       | Tumor suppressor candidate 3 (Protein N33)                            |
| BIRC2                      | BIRC2_HUMAN                                | Q13490                                           | 1                                                | 1                       | Baculoviral IAP repeat-containing protein 2 (Inhibitor of apoptosi    |
| TPBG                       | TPBG_HUMAN                                 | Q13641                                           | 1                                                | 1                       | Trophoblast glycoprotein precursor (5T4 oncofetal trophoblas          |
| RIN1                       | RIN1_HUMAN                                 | Q13671                                           | 1                                                | 1                       | Ras and Rab interactor 1 (Ras interaction/interference protein 1) (Ra |
| NID2                       | NID2_HUMAN                                 | Q14112                                           | 1                                                | 1                       | Nidogen-2 precursor (NID-2) (Osteonidogen)                            |
| DSG2                       | DSG2_HUMAN                                 | Q14126                                           | 1                                                | 1                       | Desmoglein-2 precursor (HDGC)                                         |
| GNA13                      | GNA13_HUMAN                                | Q14344                                           | 1                                                | 1                       | Guanine nucleotide-binding protein alpha-13 subunit (G alpha-13)      |
| ITPR3                      | ITPR3_HUMAN                                | Q14573                                           | 1                                                | 1                       | Inositol 1,4,5-trisphosphate receptor type 3 (Type 3 inositol 1,4,5   |
| CUL7                       | CUL7_HUMAN                                 | Q14999                                           | 1                                                | 1                       | Cullin-7 (CUL-7)                                                      |



| Up-regulated gene in HNSCC | Corresponding Swissprot entry name in PPIN | Corresponding Swissprot accession number in PPIN | Observed number of protein inter-action partners | Un-adjusted probability | Gene name                                                             |
|----------------------------|--------------------------------------------|--------------------------------------------------|--------------------------------------------------|-------------------------|-----------------------------------------------------------------------|
| TRAM2                      | TRAM2_HUMAN                                | Q15035                                           | 1                                                | 1                       | Translocation-associated membrane protein 2                           |
| PDK1                       | PDK1_HUMAN                                 | Q15118                                           | 1                                                | 1                       | [Pyruvate dehydrogenase [lipoamide]] kinase isozyme 1, mitochondria   |
| TRIP13                     | TRP13_HUMAN                                | Q15645                                           | 1                                                | 1                       | Thyroid receptor-interacting protein 13 (TRIP-13) (Thyroid hormon     |
| BAK1                       | BAK_HUMAN                                  | Q16611                                           | 1                                                | 1                       | Bcl-2 homologous antagonist/killer (Apoptosis regulator BAK) (Bcl-2   |
| FSCN1                      | FSCN1_HUMAN                                | Q16658                                           | 1                                                | 1                       | Fascin (Singed-like protein) (55 kDa actin-bundling protein) (p55)    |
| UBE2S                      | UBE2S_HUMAN                                | Q16763                                           | 1                                                | 1                       | Ubiquitin-conjugating enzyme E2 S (EC 6.3.2.19) (Ubiquitin-protei     |
| HIST2H2BE                  | H2B2E_HUMAN                                | Q16778                                           | 1                                                | 1                       | Histone H2B type 2-E (H2B.q) (H2B/q) (H2B-GL105)                      |
| ALG3                       | ALG3_HUMAN                                 | Q92685                                           | 1                                                | 1                       | Dolichyl-P-Man:Man(5)GlcNAc(2)-PP-dolichyl mannosyltransferas         |
| GGH                        | GGH_HUMAN                                  | Q92820                                           | 1                                                | 1                       | Gamma-glutamyl hydrolase precursor (EC 3.4.19.9) (Gamma-Glu-          |
| PAWR                       | PAWR_HUMAN                                 | Q96I20                                           | 1                                                | 1                       | PRKC apoptosis WT1 regulator protein (Prostate apoptosis response     |
| GPX7                       | GPX7_HUMAN                                 | Q96SL4                                           | 1                                                | 1                       | Glutathione peroxidase 7 precursor (EC 1.11.1.9) (CL683)              |
| KIF2C                      | KIF2C_HUMAN                                | Q99661                                           | 1                                                | 1                       | Kinesin-like protein KIF2C (Mitotic centromere-associated kinesin     |
| FEZ1                       | FEZ1_HUMAN                                 | Q99689                                           | 1                                                | 1                       | Fasciculation and elongation protein zeta 1 (Zygin-1) (Zygin I)       |
| SEMA3C                     | SEM3C_HUMAN                                | Q99985                                           | 1                                                | 1                       | Semaphorin-3C precursor (Semaphorin E) (Sema E)                       |
| KCNS3                      | KCNS3_HUMAN                                | Q9BQ31                                           | 1                                                | 1                       | Potassium voltage-gated channel subfamily S member 3 (Voltage-gate    |
| BTBD2                      | BTBD2_HUMAN                                | Q9BX70                                           | 1                                                | 1                       | BTB/POZ domain-containing protein 2                                   |
| UCK2                       | UCK2_HUMAN                                 | Q9BZX2                                           | 1                                                | 1                       | Uridine-cytidine kinase 2 (EC 2.7.1.48) (UCK 2) (Uridin               |
| SMURF2                     | SMUF2_HUMAN                                | Q9HAU4                                           | 1                                                | 1                       | E3 ubiquitin-protein ligase SMURF2 (EC 6.3.2.-) (Smad ubiquitinatio   |
| MYO10                      | MYO10_HUMAN                                | Q9HD67                                           | 1                                                | 1                       | Myosin-X (Unconventional myosin-10)                                   |
| PDLIM7                     | PDLI7_HUMAN                                | Q9NR12                                           | 1                                                | 1                       | PDZ and LIM domain protein 7 (LIM mineralization protein) (LMP        |
| HOMER3                     | HOME3_HUMAN                                | Q9NSC5                                           | 1                                                | 1                       | Homer protein homolog 3 (Homer-3)                                     |
| SCHIP1                     | SCHI1_HUMAN                                | Q9P0W5                                           | 1                                                | 1                       | Schwannomin-interacting protein 1 (SCHIP-1)                           |
| STK17A                     | ST17A_HUMAN                                | Q9UEE5                                           | 1                                                | 1                       | Serine/threonine-protein kinase 17A (EC 2.7.11.1) (DAP kinase-relate  |
| PROCR                      | EPCR_HUMAN                                 | Q9UNN8                                           | 1                                                | 1                       | Endothelial protein C receptor precursor (Endothelial cell protein    |
| NCDN                       | Q9Y4D9_HUMAN                               | Q9Y4D9                                           | 1                                                | 1                       | Neurochondrin (Fragment)                                              |
| MYO5A                      | MYO5A_HUMAN                                | Q9Y4I1                                           | 1                                                | 1                       | Myosin-Va (Dilute myosin heavy chain, non-muscle) (Myosin-12) (Myosi  |
| LOXL2                      | LOXL2_HUMAN                                | Q9Y4K0                                           | 1                                                | 1                       | Lysyl oxidase homolog 2 precursor (EC 1.4.3.-) (Lysyl oxidase-lik     |
| LSM4                       | LSM4_HUMAN                                 | Q9Y4Z0                                           | 1                                                | 1                       | U6 snRNA-associated Sm-like protein LSM4 (Glycine-rich protein) (GRP) |
| CLIC4                      | CLIC4_HUMAN                                | Q9Y696                                           | 1                                                | 1                       | Chloride intracellular channel protein 4 (Intracellular chloride io   |

**Supporting Table 12. Detailed references for the protein-protein interactions between the top 56 prioritized proteins and their interactors among the 260 proteins derived from the upregulated HSNCC genes in GSE6631 (Network shown in Figure 3, count of interactors in Table S11, Methods).**

| First biomolecule of the interaction |             | Second biomolecule of the interaction |             | Reference(s) in support of the Protein Interaction (Pubmed ids and Source dataset preceded by @ ) |
|--------------------------------------|-------------|---------------------------------------|-------------|---------------------------------------------------------------------------------------------------|
| Protein (Uniprot)                    | Gene (HGNC) | Protein (Uniprot)                     | Gene (HGNC) |                                                                                                   |
| O00762                               | UBE2C       | O14965                                | AURKA       | @REACTOME                                                                                         |
| O00762                               | UBE2C       | O60566                                | BUB1B       | 11535616,11285280,11742988 @REACTOME                                                              |
| O00762                               | UBE2C       | P06493                                | CDC2        | 10679238,11285280,11285280,11859075,14657031 @REACTOME                                            |
| O00762                               | UBE2C       | P14635                                | CCNB1       | 11285280,11859075,14657031 @REACTOME                                                              |
| O00762                               | UBE2C       | P49721                                | PSMB2       | 11285280,12070128,15029244 @REACTOME                                                              |
| O00762                               | UBE2C       | Q12834                                | CDC20       | 11285280,11535616,11742988,12070128 @REACTOME                                                     |
| O00762                               | UBE2C       | Q13200                                | PSMD2       | 11285280,12070128,15029244 @REACTOME                                                              |
| O00762                               | UBE2C       | Q96GD4                                | AURKB       | @REACTOME                                                                                         |
| O14965                               | AURKA       | P49721                                | PSMB2       | @REACTOME                                                                                         |
| O14965                               | AURKA       | Q12834                                | CDC20       | 10377410 @BIOGRID; @REACTOME                                                                      |
| O14965                               | AURKA       | Q13200                                | PSMD2       | @REACTOME                                                                                         |
| O14965                               | AURKA       | Q96GD4                                | AURKB       | @REACTOME                                                                                         |
| O14965                               | AURKA       | Q9ULW0                                | TPX2        | 12177045 @BIOGRID                                                                                 |
| O15427                               | SLC16A3     | P35613                                | BSG         | 10921872 @BIOGRID                                                                                 |
| O60566                               | BUB1B       | P06493                                | CDC2        | 10679238,11285280,11285280 @REACTOME                                                              |
| O60566                               | BUB1B       | P49721                                | PSMB2       | 11285280 @REACTOME                                                                                |
| O60566                               | BUB1B       | P63010                                | AP2B1       | 12419313,16189514 @BIOGRID                                                                        |
| O60566                               | BUB1B       | Q12834                                | CDC20       | 11030144,11274370,11535616,11907259 @BIOGRID;11285280,11535616,11742988 @REACTOME                 |
| O60566                               | BUB1B       | Q13200                                | PSMD2       | 11285280 @REACTOME                                                                                |
| O95067                               | CCNB2       | P06493                                | CDC2        | 1717476 @REACTOME;9926943 @BIOGRID; 9926943 @HPRD; @REACTOME                                      |
| O95067                               | CCNB2       | P30305                                | CDC25B      | @REACTOME                                                                                         |
| P00533                               | EGFR        | P08648                                | ITGA5       | 10888683 @BIOGRID                                                                                 |
| P00533                               | EGFR        | P09619                                | PDGFRB      | 9506992 @BIOGRID                                                                                  |
| P00533                               | EGFR        | P16070                                | CD44        | 12093135 @BIOGRID;12093135 @HPRD                                                                  |
| P00533                               | EGFR        | P24821                                | TNC         | 11470832 @BIOGRID                                                                                 |
| P00533                               | EGFR        | P29353                                | SHC1        | 12577067 @BIOGRID;9544989,8887653,12577067 @HPRD;9544989 @BIOGRID                                 |
| P00533                               | EGFR        | P42224                                | STAT1       | 12070153 @BIOGRID                                                                                 |
| P00533                               | EGFR        | Q04695                                | KRT17       | 12577067 @BIOGRID                                                                                 |
| P00533                               | EGFR        | Q05397                                | PTK2        | 10806474 @BIOGRID                                                                                 |
| P00533                               | EGFR        | Q13191                                | CBLB        | 10086340 @BIOGRID                                                                                 |

| First biomolecule of the interaction |             | Second biomolecule of the interaction |             | Reference(s) in support of the Protein Interaction (Pubmed ids and Source dataset preceded by @ ) |
|--------------------------------------|-------------|---------------------------------------|-------------|---------------------------------------------------------------------------------------------------|
| Protein (Uniprot)                    | Gene (HGNC) | Protein (Uniprot)                     | Gene (HGNC) |                                                                                                   |
| P00533                               | EGFR        | Q15149                                | PLEC1       | 12577067 @BIOGRID; 12577067 @HPRD                                                                 |
| P00749                               | PLAU        | P05121                                | SERPINE1    | 2161846 @BIOGRID;2544876 @REACTOME                                                                |
| P00749                               | PLAU        | P14543                                | NID1        | 1499567 @BIOGRID;1499567 @HPRD                                                                    |
| P00749                               | PLAU        | Q03405                                | PLAUR       | 11501527,16189514,3031025 @BIOGRID;1846368,2156852,3023326,2156852,3023326,1846368 @REACTOME      |
| P01137                               | TGFB1       | P05067                                | APP         | 16189514 @BIOGRID                                                                                 |
| P01137                               | TGFB1       | P06756                                | ITGAV       | 11970960 @BIOGRID                                                                                 |
| P01137                               | TGFB1       | P09486                                | SPARC       | 15034927,16189514 @BIOGRID                                                                        |
| P01137                               | TGFB1       | P21810                                | BGN         | 10383378,16189514,8093006 @BIOGRID                                                                |
| P02452                               | COL1A1      | P02751                                | FN1         | 8468356 @BIOGRID                                                                                  |
| P02452                               | COL1A1      | P08123                                | COL1A2      | 9028946 @REACTOME; @REACTOME                                                                      |
| P02452                               | COL1A1      | P08648                                | ITGA5       | 16189514,1693626 @BIOGRID                                                                         |
| P02452                               | COL1A1      | P09486                                | SPARC       | 16189514,7034958 @BIOGRID                                                                         |
| P02452                               | COL1A1      | P14543                                | NID1        | 9733643 @BIOGRID                                                                                  |
| P02452                               | COL1A1      | P14780                                | MMP9        | 16189514,9878537 @BIOGRID                                                                         |
| P02452                               | COL1A1      | P16070                                | CD44        | 16189514,1730778 @BIOGRID                                                                         |
| P02452                               | COL1A1      | P21810                                | BGN         | 16189514,7852349 @BIOGRID                                                                         |
| P02452                               | COL1A1      | Q02388                                | COL7A1      | 9169408 @BIOGRID                                                                                  |
| P02452                               | COL1A1      | Q15582                                | TGFBI       | 11867580,12034705,16189514 @BIOGRID                                                               |
| P02461                               | COL3A1      | P09486                                | SPARC       | 16189514,2745554 @BIOGRID                                                                         |
| P02462                               | COL4A1      | P02751                                | FN1         | 3997552 @BIOGRID                                                                                  |
| P02462                               | COL4A1      | P05067                                | APP         | 9136074 @BIOGRID                                                                                  |
| P02462                               | COL4A1      | P07093                                | SERPINE2    | 8006028 @BIOGRID                                                                                  |
| P02462                               | COL4A1      | P08572                                | COL4A2      | 12011424 @BIOGRID                                                                                 |
| P02462                               | COL4A1      | P14780                                | MMP9        | 9878537 @BIOGRID                                                                                  |
| P02462                               | COL4A1      | Q02388                                | COL7A1      | 9169408 @BIOGRID                                                                                  |
| P02462                               | COL4A1      | Q15582                                | TGFBI       | 11867580 @BIOGRID                                                                                 |
| P02751                               | FN1         | P08123                                | COL1A2      | 8468356 @BIOGRID                                                                                  |
| P02751                               | FN1         | P08572                                | COL4A2      | 3997552 @BIOGRID                                                                                  |
| P02751                               | FN1         | P08648                                | ITGA5       | 11801679,9211865 @BIOGRID                                                                         |
| P02751                               | FN1         | P14780                                | MMP9        | 11134254 @BIOGRID                                                                                 |
| P02751                               | FN1         | P24821                                | TNC         | 7499434 @BIOGRID                                                                                  |
| P02751                               | FN1         | P26006                                | ITGA3       | 9733622 @BIOGRID                                                                                  |
| P02751                               | FN1         | Q02388                                | COL7A1      | 7963647,9169408 @BIOGRID                                                                          |

| First biomolecule of the interaction |             | Second biomolecule of the interaction |             | Reference(s) in support of the Protein Interaction (Pubmed ids and Source dataset preceded by @ )                                                    |
|--------------------------------------|-------------|---------------------------------------|-------------|------------------------------------------------------------------------------------------------------------------------------------------------------|
| Protein (Uniprot)                    | Gene (HGNC) | Protein (Uniprot)                     | Gene (HGNC) |                                                                                                                                                      |
| P02751                               | FN1         | Q15582                                | TGFBI       | 11867580,12034705 @BIOGRID                                                                                                                           |
| P03956                               | MMP1        | P35613                                | BSG         | 10706100,16189514 @BIOGRID                                                                                                                           |
| P04085                               | PDGFA       | P09486                                | SPARC       | 1311092 @BIOGRID                                                                                                                                     |
| P04216                               | THY1        | P06756                                | ITGAV       | 15897908 @HPRD                                                                                                                                       |
| P05067                               | APP         | P08123                                | COL1A2      | 7688497 @BIOGRID                                                                                                                                     |
| P05067                               | APP         | P08572                                | COL4A2      | 9136074 @BIOGRID                                                                                                                                     |
| P05067                               | APP         | P14543                                | NID1        | 11376898 @BIOGRID; @HPRD                                                                                                                             |
| P05067                               | APP         | P21810                                | BGN         | 16189514,7793988 @BIOGRID;7793988 @HPRD                                                                                                              |
| P05067                               | APP         | P27797                                | CALR        | 11378243,16189514 @BIOGRID                                                                                                                           |
| P05067                               | APP         | P29353                                | SHC1        | 11877420,9045663 @HPRD;11877420,16189514,9045663 @BIOGRID                                                                                            |
| P05067                               | APP         | Q92870                                | APBB2       | 14527950,16189514,8855266 @BIOGRID;8855266,14527950 @HPRD                                                                                            |
| P05121                               | SERPINE1    | Q03405                                | PLAUR       | 2544876 @REACTOME                                                                                                                                    |
| P06400                               | RB1         | P20248                                | CCNA2       | @BIND                                                                                                                                                |
| P06400                               | RB1         | P24864                                | CCNE1       | @BIND                                                                                                                                                |
| P06400                               | RB1         | P33993                                | MCM7        | 16189514,9566894 @BIOGRID; @BIND                                                                                                                     |
| P06400                               | RB1         | P61024                                | CKS1B       | @BIND                                                                                                                                                |
| P06400                               | RB1         | Q16667                                | CDKN3       | @BIND                                                                                                                                                |
| P06493                               | CDC2        | P14635                                | CCNB1       | 10362260,1833185,10973963 @DIP;10395539,1384126,1717476,1828290,7799941,8440392,12411508,10827953,8119945,9670027,9679058 @REACTOME;2570636 @BIOGRID |
| P06493                               | CDC2        | P20248                                | CCNA2       | 10924145 @BIOGRID;1833185 @DIP; @REACTOME                                                                                                            |
| P06493                               | CDC2        | P24864                                | CCNE1       | 1388288 @BIOGRID;1833068 @DIP                                                                                                                        |
| P06493                               | CDC2        | P30305                                | CDC25B      | 10827953,12411508,8119945,8440392,1828290 @REACTOME;9585407,9733650,9268380,9141461,8440392,12107172 @HPRD                                           |
| P06493                               | CDC2        | P33552                                | CKS2        | 2227411 @HPRD                                                                                                                                        |
| P06493                               | CDC2        | P39880                                | CUX1        | 11584018 @HPRD                                                                                                                                       |
| P06493                               | CDC2        | P49721                                | PSMB2       | 11285280 @REACTOME                                                                                                                                   |
| P06493                               | CDC2        | P61024                                | CKS1B       | 16189514 @BIOGRID                                                                                                                                    |
| P06493                               | CDC2        | Q12834                                | CDC20       | 10679238,11285280,11285280,12791267 @REACTOME                                                                                                        |
| P06493                               | CDC2        | Q13200                                | PSMD2       | 11285280 @REACTOME                                                                                                                                   |
| P06493                               | CDC2        | Q15149                                | PLEC1       | 8626512 @HPRD                                                                                                                                        |
| P06493                               | CDC2        | Q16667                                | CDKN3       | 8127873 @BIOGRID;8242750 @DIP                                                                                                                        |
| P06493                               | CDC2        | Q96R06                                | SPAG5       | 11549262 @BIOGRID                                                                                                                                    |
| P06493                               | CDC2        | Q99640                                | PKMYT1      | 10373560,10504341,9001210,9268380,12912980 @HPRD;10504341 @BIOGRID; @REACTOME                                                                        |
| P06756                               | ITGAV       | P10451                                | SPP1        | 10835423 @BIOGRID                                                                                                                                    |

| First biomolecule of the interaction |             | Second biomolecule of the interaction |             | Reference(s) in support of the Protein Interaction (Pubmed ids and Source dataset preceded by @ ) |
|--------------------------------------|-------------|---------------------------------------|-------------|---------------------------------------------------------------------------------------------------|
| Protein (Uniprot)                    | Gene (HGNC) | Protein (Uniprot)                     | Gene (HGNC) |                                                                                                   |
| P06756                               | ITGAV       | P14543                                | NID1        | 9686320 @HPRD                                                                                     |
| P06756                               | ITGAV       | Q05397                                | PTK2        | 11927607 @BIOGRID                                                                                 |
| P07093                               | SERPINE2    | P08572                                | COL4A2      | 8006028 @BIOGRID                                                                                  |
| P08069                               | IGF1R       | P29353                                | SHC1        | 8776723 @BIOGRID;8776723 @HPRD; @BIND                                                             |
| P08123                               | COL1A2      | P09486                                | SPARC       | 7034958 @BIOGRID                                                                                  |
| P08123                               | COL1A2      | P14780                                | MMP9        | 9878537 @BIOGRID                                                                                  |
| P08123                               | COL1A2      | P16070                                | CD44        | 1730778 @BIOGRID                                                                                  |
| P08123                               | COL1A2      | P21810                                | BGN         | 7852349 @BIOGRID                                                                                  |
| P08123                               | COL1A2      | P51884                                | LUM         | 10734230 @BIOGRID                                                                                 |
| P08123                               | COL1A2      | Q15582                                | TGFBI       | 11867580,12034705 @BIOGRID                                                                        |
| P08195                               | SLC3A2      | Q01650                                | SLC7A5      | 11311135,9829974 @BIOGRID                                                                         |
| P08572                               | COL4A2      | P14780                                | MMP9        | 9878537 @BIOGRID                                                                                  |
| P08572                               | COL4A2      | P21810                                | BGN         | 11259413 @BIOGRID                                                                                 |
| P08572                               | COL4A2      | Q15582                                | TGFBI       | 11867580 @BIOGRID                                                                                 |
| P08648                               | ITGA5       | P10451                                | SPP1        | 16189514,7592829 @BIOGRID                                                                         |
| P08648                               | ITGA5       | P24821                                | TNC         | 9314546 @BIOGRID                                                                                  |
| P09619                               | PDGFRB      | P29353                                | SHC1        | 16189514,8195171 @BIOGRID; @BIND                                                                  |
| P10244                               | MYBL2       | P20248                                | CCNA2       | 10871850 @BIOGRID                                                                                 |
| P10253                               | GAA         | P15121                                | AKR1B1      | @KEGG                                                                                             |
| P10253                               | GAA         | P52789                                | HK2         | @KEGG                                                                                             |
| P10451                               | SPP1        | P16070                                | CD44        | 10657301,12377945,16189514 @BIOGRID                                                               |
| P11047                               | LAMC1       | P14543                                | NID1        | 9733643 @HPRD                                                                                     |
| P12318                               | FCGR2A      | P29353                                | SHC1        | 10382761,8940017 @HPRD;10382761,16189514,8940017 @BIOGRID                                         |
| P13497                               | BMP1        | Q13751                                | LAMB3       | 10806203 @HPRD                                                                                    |
| P13497                               | BMP1        | Q13753                                | LAMC2       | 10806203 @BIOGRID;10806203 @HPRD                                                                  |
| P13497                               | BMP1        | Q16787                                | LAMA3       | 10806203 @BIOGRID;10806203 @HPRD                                                                  |
| P14543                               | NID1        | Q13753                                | LAMC2       | 11733994 @HPRD                                                                                    |
| P14635                               | CCNB1       | P30305                                | CDC25B      | 10827953,12411508,8119945,8440392,1828290 @REACTOME                                               |
| P14635                               | CCNB1       | Q12834                                | CDC20       | 11285280,12791267 @REACTOME                                                                       |
| P14780                               | MMP9        | P16070                                | CD44        | 10652271,16189514 @BIOGRID                                                                        |
| P14780                               | MMP9        | P35442                                | THBS2       | 10900205 @BIOGRID                                                                                 |
| P16144                               | ITGB4       | P23229                                | ITGA6       | 9660880 @BIOGRID                                                                                  |
| P16144                               | ITGB4       | P29353                                | SHC1        | 11044453 @BIOGRID                                                                                 |
| P16144                               | ITGB4       | Q15149                                | PLEC1       | 11328943 @BIOGRID                                                                                 |

| First biomolecule of the interaction |             | Second biomolecule of the interaction |             | Reference(s) in support of the Protein Interaction (Pubmed ids and Source dataset preceded by @ ) |
|--------------------------------------|-------------|---------------------------------------|-------------|---------------------------------------------------------------------------------------------------|
| Protein (Uniprot)                    | Gene (HGNC) | Protein (Uniprot)                     | Gene (HGNC) |                                                                                                   |
| P20248                               | CCNA2       | P61024                                | CKS1B       | @BIND                                                                                             |
| P20248                               | CCNA2       | Q12834                                | CDC20       | 10679238 @BIOGRID                                                                                 |
| P21741                               | MDK         | P42224                                | STAT1       | 9452495,16189514 @BIOGRID                                                                         |
| P21810                               | BGN         | P55001                                | MFAP2       | 11723132 @HPRD                                                                                    |
| P24864                               | CCNE1       | P61024                                | CKS1B       | @BIND                                                                                             |
| P24864                               | CCNE1       | Q99640                                | PKMYT1      | @REACTOME                                                                                         |
| P25205                               | MCM3        | P33993                                | MCM7        | 16189514,7601140,8631321,10464337 @BIOGRID;10884341,12364596 @REACTOME                            |
| P25205                               | MCM3        | P42224                                | STAT1       | 11248027,16189514 @BIOGRID                                                                        |
| P25205                               | MCM3        | P49736                                | MCM2        | 10884341,12364596 @REACTOME;16189514 @BIOGRID                                                     |
| P25205                               | MCM3        | Q14566                                | MCM6        | 10884341,12364596 @REACTOME;16189514 @BIOGRID                                                     |
| P25205                               | MCM3        | Q14691                                | GINS1       | @REACTOME                                                                                         |
| P26006                               | ITGA3       | P27797                                | CALR        | 11327697 @BIOGRID                                                                                 |
| P26006                               | ITGA3       | P48509                                | CD151       | 14676841 @HPRD                                                                                    |
| P26006                               | ITGA3       | Q16787                                | LAMA3       | 9950675,11278628 @BIOGRID                                                                         |
| P26038                               | MSN         | Q15149                                | PLEC1       | 11441066 @BIOGRID;11441066 @HPRD                                                                  |
| P29353                               | SHC1        | P35568                                | IRS1        | 7499194 @BIOGRID                                                                                  |
| P29353                               | SHC1        | Q05397                                | PTK2        | 11980671,16189514 @BIOGRID                                                                        |
| P29353                               | SHC1        | Q05682                                | CALD1       | 10559276,16189514 @BIOGRID                                                                        |
| P29353                               | SHC1        | Q13191                                | CBLB        | 9614102,16189514 @BIOGRID                                                                         |
| P33552                               | CKS2        | P61024                                | CKS1B       | 2227411 @HPRD                                                                                     |
| P33993                               | MCM7        | P49736                                | MCM2        | 10748114,12207017,16189514,10567526,8798650 @BIOGRID;10884341,12364596 @REACTOME                  |
| P33993                               | MCM7        | Q14566                                | MCM6        | 10567526,10748114,12207017,12694531,8798650 @BIOGRID; @REACTOME                                   |
| P33993                               | MCM7        | Q14691                                | GINS1       | @REACTOME                                                                                         |
| P35613                               | BSG         | P53985                                | SLC16A1     | 10921872 @BIOGRID                                                                                 |
| P42224                               | STAT1       | Q03405                                | PLAUR       | @BIND                                                                                             |
| P42224                               | STAT1       | Q05397                                | PTK2        | 11278462,16189514 @BIOGRID                                                                        |
| P49450                               | CENPA       | P68431                                | HIST1H3J    | 15282608 @BIOGRID                                                                                 |
| P49721                               | PSMB2       | Q12834                                | CDC20       | 11285280, 12070128,15469984 @REACTOME                                                             |
| P49721                               | PSMB2       | Q13200                                | PSMD2       | @REACTOME                                                                                         |
| P49721                               | PSMB2       | Q96GD4                                | AURKB       | @REACTOME                                                                                         |
| P49736                               | MCM2        | Q14566                                | MCM6        | 10884341,12364596 @REACTOME;12694531,16189514 @BIOGRID;@ BIND                                     |
| P49736                               | MCM2        | Q14691                                | GINS1       | @REACTOME                                                                                         |
| P50281                               | MMP14       | P51884                                | LUM         | 15466200 @BIOGRID                                                                                 |
| P61024                               | CKS1B       | Q16667                                | CDKN3       | @BIND                                                                                             |

| First biomolecule of the interaction |             | Second biomolecule of the interaction |             | Reference(s) in support of the Protein Interaction (Pubmed ids and Source dataset preceded by @ ) |
|--------------------------------------|-------------|---------------------------------------|-------------|---------------------------------------------------------------------------------------------------|
| Protein (Uniprot)                    | Gene (HGNC) | Protein (Uniprot)                     | Gene (HGNC) |                                                                                                   |
| P68431                               | HIST1H3J    | P83916                                | CBX1        | 11882902 @BIOGRID;11882902 @HPRD                                                                  |
| P68431                               | HIST1H3J    | Q96GD4                                | AURKB       | 10949293 @HPRD                                                                                    |
| Q02388                               | COL7A1      | Q13753                                | LAMC2       | 9989793 @BIOGRID                                                                                  |
| Q03405                               | PLAUR       | Q12884                                | FAP         | 12376466 @BIOGRID                                                                                 |
| Q12834                               | CDC20       | Q13200                                | PSMD2       | 11285280,12070128,15469984 @REACTOME                                                              |
| Q12834                               | CDC20       | Q96GD4                                | AURKB       | @REACTOME                                                                                         |
| Q13200                               | PSMD2       | Q96GD4                                | AURKB       | @REACTOME                                                                                         |
| Q13751                               | LAMB3       | Q13753                                | LAMC2       | 10964684 @HPRD                                                                                    |
| Q13751                               | LAMB3       | Q16787                                | LAMA3       | 7775432 @HPRD                                                                                     |
| Q14566                               | MCM6        | Q14691                                | GINS1       | @REACTOME                                                                                         |

**Supporting Table 13. Primer sets used in real-time qRT-PCR for the determination of miR-204 target mRNA expression (related to Figure 2B-C, and Figures S4-S5).**

| Gene    | GenBank accession | Forward                        | Reverse                       |
|---------|-------------------|--------------------------------|-------------------------------|
| ARPC1B  | BC002988          | cggatCACATCAAGAAGCCCATCcG      | GCAGCCAGCAGCACATTGTT          |
| ATP2B1  | NM_001682         | ATTGATGACACTGATGCCGAAGA        | cgtaacGGGTGGAGGACTGGAGTTAcG   |
| BMP1    | AK291620          | cggtaACGTCCCTGGACCTGTACcG      | CCATCTCGGACCTCCACATAGTC       |
| CDC25B  | NM_021873         | ACGAGACCGTGCTGTCAACG           | cggcGGAAGAACTCCTTGTAGCcG      |
| CDH11   | NM_001797         | CAGTACACGTTGATGGCTCAGG         | cggagGGTCTCGTGCAGGAACTCcG     |
| CTSC    | BC109386          | CCAACTGCACCTATCTTGACCTG        | cgatgtATAACCGAGCAGTTGACATcG   |
| EBN2    | NM_004519         | CCCTACTCGGACCGAATCTCC          | cgcgGAGGTGTGTCACTGTCTCGcG     |
| EFNB1   | NM_004429         | GCACCCTGTCTACATCGTCCA          | cggcACCTTGTAGTAGATGTTCCGcG    |
| FAP     | NM_004460         | AATCAACTGTGATGGCAAGAGC         | cggaacCACATTATCATCTGCTGTTCCcG |
| HMGA2   | NM_003483         | cggctGTCTCTTCCCTTCCAAGCcG      | GGGTTGGGATCAGGAGTTGC          |
| IGF2BP3 | NM_006547         | cgggCCATGACTCCTCCCTACCcG       | TGGCACCGACTGATAGAGCTG         |
| INHBA   | NM_002192         | ATTGGAAGGAGGGCAGAAATGA         | cggagGGCAAACGTGATGATCTCcG     |
| ITGB4   | NM_001005619      | CAGAGAAGCAGGTGGAACAGAGG        | cggcGCAGTGAGGGTGTAGTAGCcG     |
| LTBP1   | NM_000627         | cggtcCCCTACTTCATCCAAGACcG      | CCGCATTCCTCAGCCTGTAAC         |
| MMP3    | NM_002422         | GTTCCGCCTGTCTCAAGATGAT         | cggaaGTTCTGGAGGGACAGGTTCCcG   |
| MMP9    | AF538844          | cggttAGTCAAGATGACATCTGAACcG    | CCCTTGCACAGGAAGAAGCTC         |
| MY010   | AF060223          | cgggtTACTTCATGCAGCTTCAGACCcG   | GCAGCACTTGTAGAAGGTGGTCA       |
| SHC1    | NM_183001         | GCTGCATCCCAACGACAAAG           | cggtaTCCACACAACCCATGTACcG     |
| SOX4    | NM_003107         | ATGTCCCTGGGCAGCTTCAGT          | cgggCGAAGTTAAAATCCAGGTCCcG    |
| SPARC   | NM_003118         | GAATTTGATGATGGTGCAGAGGA        | cggaaGTTCTGGCAGGGATTTTCcG     |
| TBP     | NM_003194         | cgaagtTGACCTAAAGACCATTGCACTTcG | CTGGTTCGTGGCTCTCTTATC         |
| TRPM3   | NM_206948         | cggacTCATTGGAAGAGATGTTGTCcG    | CAGTGAGCTTGCTCATGGGATT        |
| AURKB   | NM_004217         | GCTTTGCTATGAGCTGCTGGTG         | cgcTATAGGTCCACCTTGACGATGcG    |
| BIRC2   | NM_001166         | cgggTGTCTACATATTCAACTTCCcG     | ACCAGCACGAGCAAGACTCCT         |
| HOXB7   | NM_004502         | cggagCCTTTGAGCAGAACCTCTCcG     | GTCAGTTCCTGAGCTTCCGCATC       |
| ERF     | NM_006494         | CCGCCACCACAGATCAAGGT           | cgagtcCACCTCTACCTCCTCCGACTcG  |



**Supporting Table 14. List of Abbreviations referred in the manuscript.**

| <b>Abbreviation</b> | <b>Expanded description</b>                                                                 |
|---------------------|---------------------------------------------------------------------------------------------|
| APRC1B              | Actin related Protein 2/3 complex, subunit 1B                                               |
| AURKB               | Aurora Kinase B                                                                             |
| BIND                | Biomolecular Interaction Network Database                                                   |
| BioGRID             | General Repository for Interaction Datasets                                                 |
| BMC                 | Basement Membrane Complex                                                                   |
| BMP1                | Bone Morphogenetic Protein 1                                                                |
| BP                  | Biological Processes                                                                        |
| BSA                 | Bovine Serum Albumin                                                                        |
| CAGR                | Cancer Associated Genomic Regions                                                           |
| CDC25B              | Cell Division Cycle 25 homolog B                                                            |
| CDH11               | Cadherin 11, type 2, OB-cadherin                                                            |
| Ct                  | PCR Cycle Treshold                                                                          |
| CTSC                | Carbohydrate Sulfotransferase 2                                                             |
| DIP                 | Database of Interacting Proteins                                                            |
| ECM                 | Extracellular Matrix                                                                        |
| EGFR                | Epidermal Growth Factor Receptor                                                            |
| FAP                 | Fibroblast Activation Protein, Alpha                                                        |
| FDR                 | False Discovery Rate                                                                        |
| GFP                 | Green Fluorescence Protein                                                                  |
| GO                  | Gene Ontology                                                                               |
| GUSB                | Glucuronidase, Beta                                                                         |
| HNSCC               | Squamous Cell Carcinoma of the Head and Neck                                                |
| HPRD                | Human Proteome Reference Database                                                           |
| HPRT1               | Hypoxanthine Phosphoribosyltransferase 1                                                    |
| HUGO                | Human Genome Organization                                                                   |
| IACUC               | Institutional Animal Care and Use Committee (according to U.S. federal law)                 |
| ID                  | Identifier                                                                                  |
| IMRE                | Imputed microRNA Regulation based on Weighted Rank Expression and Putative microRNA Targets |
| IQR                 | Inter Quartile Range                                                                        |
| ITGB4               | Integrin, Beta 4                                                                            |
| JSQ3                | Head and Neck Cancer Cell Line                                                              |
| KEGG                | Kyoto Encyclopedia of Genes and Genomes                                                     |
| LOH                 | Loss of Heterozygosity                                                                      |
| LSM                 | Lexico-Semantic Mapping                                                                     |
| MF                  | Molecular Functions                                                                         |
| MINT                | Molecular INTeraction database                                                              |
| miRNOME             | Five complementary microRNA target datasets integrated together                             |
| MMP9                | Matrix Metallopeptidase 9                                                                   |
| MTT                 | MTT Cell Proliferation assay                                                                |
| OMIM                | Online Mendelian Inheritance in Man                                                         |
| OncoMIM             | Cancer-related Clinical Terms and MIM Genes                                                 |
| OPP                 | Optimized Partial Mapping                                                                   |

| <b>Abbreviation</b> | <b>Expanded description</b>                                    |
|---------------------|----------------------------------------------------------------|
| PCR                 | Polymerase Chain Reaction                                      |
| PPIA                | Peptidylprolyl Isomerase A (cyclophilin A)                     |
| PPIN                | Protein-Protein Interaction Network                            |
| qPCR                | Quantitative PCR                                               |
| RM                  | Regional Minimum                                               |
| RoL                 | Review of Literature                                           |
| RRM                 | Refined Regional Minimum                                       |
| SAM                 | Significant Analysis of Microarray                             |
| SDRRM               | Significant Descendants of Refined Regional Minimum            |
| SE                  | Standard Error                                                 |
| SHC1                | SHC transforming protein 1                                     |
| SNOMED              | Systematized Nomenclature of Medicine                          |
| SQ38                | Head and Neck Cancer Cell Line [Cancer Res, 1992; 52(19):5299] |
| TRPM3               | Transient Receptor Potential Melastatin 3 cation channel       |
| WRE                 | Weighted Rank Expression                                       |
