# Supplementary material for: Network Modeling Identifies Molecular Functions Targeted by miR-204 to Suppress Head and Neck Tumor Metastasis
Source: PLOS journal article supplement (doi:10.1371/journal.pcbi.1000730), 2010-04-01
Supplement: S3 (10.1371/journal.pcbi.1000730.s003) [file journal.pcbi.1000730.s003]

301 Moved Permanently

# Moved Permanently

The document has moved here.

---

Apache Server at www.ploscompbiol.org Port 80
